# Supplementary material for: Radical addition reaction between chromenols and toluene derivatives initiated by Brønsted acid catalyst under light irradiation
Source: Royal Society of Chemistry journal article supplement (doi:10.1039/d1qo00657f), 2021-01-01
Supplement: d1qo00657f1.pdf [file d1qo00657f1.pdf]

## Electronic Supplementary Information

### Radical Addition Reaction between Chromenols and Toluene Derivatives Initiated by Brønsted Acid Catalyst under Light Irradiation

Jun Kikuchi, Shota Kodama, Masahiro Terada\*

e-mail: mterada@tohoku.ac.jp

Department of Chemistry, Graduate School of Science, Tohoku University,  
Aoba-ku, Sendai 980-8578, Japan.

#### Contents

1. General Information
2. Preparation of substrates
3. Preparation of catalyst
4. Radical addition reaction between chromenol and toluene derivatives
5. Enantioselective radical addition reaction using chiral phosphoric acid catalyst
6. Additional screening
7. UV-Vis absorption spectroscopy
8. Stern-Volmer fluorescence quenching experiments
9. Light ON/OFF Experiment
10. Theoretical studies
11. X-ray crystallographic analysis
12. NMR spectra
13. HPLC chart

## 1. General Information

All reactions were carried out under argon atmosphere in flame-dried glassware. Dichloromethane ( $\text{CH}_2\text{Cl}_2$ ), and toluene were supplied from KANTO Chemical Co., Inc. as “Dehydrated solvent system”. Other solvents and reagents were purchased from commercial suppliers and used without further purification. Photo-reactions were carried out using Techno Sigma-PER-AMP. Purification of reaction products was carried out by flash column chromatography using silica gel 60 N (Merck 40-63  $\mu\text{m}$ ). Analytical thin layer chromatography (TLC) was performed on Merck precoated TLC plates (silica gel 60 GF 254, 0.25 mm).  $^1\text{H}$  NMR spectra were recorded on a JEOL ECA-600 (600 MHz) spectrometer. Chemical shifts are reported in ppm from tetramethylsilane or solvent resonance as the internal standard ( $\text{CDCl}_3$ : 7.26 ppm, TMS: 0.00 ppm,  $\text{C}_6\text{D}_6$ : 7.16 ppm).  $^{13}\text{C}$  NMR spectra were recorded on a JEOL ECA-600 (151 MHz) spectrometer with complete proton decoupling. Chemical shifts are reported in ppm from the solvent resonance as the internal standard ( $\text{CDCl}_3$ : 77.0 ppm,  $\text{C}_6\text{D}_6$ : 128.06 ppm).  $^{31}\text{P}$  NMR spectra were recorded on a JEOL JNM-ECA600 (243 MHz) spectrometer with complete proton decoupling. Chemical shifts are reported in ppm with 85%  $\text{H}_3\text{PO}_4$  solution as an external standard (0.0 ppm in  $\text{CDCl}_3$ ).  $^{19}\text{F}$  NMR spectra were recorded on JEOL ECA-600 (565 MHz) spectrometer with complete proton decoupling. Chemical shifts are reported in ppm from the  $\text{C}_6\text{H}_5\text{CF}_3$  (-67.2 ppm) resonance as the external standard. Infrared spectra were recorded on a Jasco FT/IR-4100 spectrometer. Mass spectra analysis using ESI ionization method was performed on a Bruker Daltonics solariX 9.4T spectrometer at the Research and Analytical Center for Giant Molecules, Graduate School of Science, Tohoku University. X-ray crystallography analysis was carried out using a Rigaku XtaLAB mini diffractometer using graphite monochromated Mo-K $\alpha$  radiation at the Research and Analytical Center for Giant Molecules, Graduate School of Science, Tohoku University. UV/Vis absorption spectra were recorded on a JASCO V650DS spectrometer. Fluorescence spectra were recorded on a HITACHI F-4500.

## 2. Preparation of substrates

Representative procedure for the synthesis of novel chromenols<sup>1</sup>

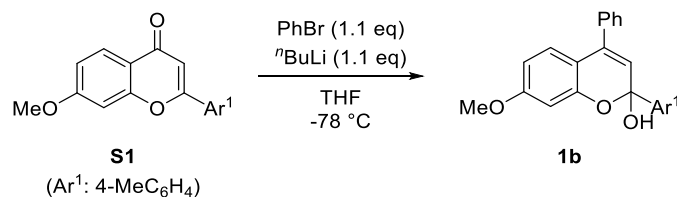

To a solution of PhBr (414.5 mg, 2.64 mmol) in THF (10.6 ml) was added <sup>n</sup>BuLi (1.6 M in hexane, 1.7 mL, 2.64 mmol) at -78 °C. The resulting mixture was stirred for 30 min at -78 °C. To a solution of **S1** (639.1 mg, 2.4 mmol) in THF (24 mL) was added a resulting PhLi solution at -78 °C. After stirring for 2 h at -78 °C, the reaction mixture was quenched by water, and then extracted with EtOAc. The combined organic layers were dried over Na<sub>2</sub>SO<sub>4</sub>, filtered, and concentrated. The residue was purified by flash column chromatography on silica gel (hexane/EtOAc/Et<sub>3</sub>N = 7/1/0.01) to give **1b** (586.9 mg, 1.7 mmol, 71% yield) as a yellow solid.

### 2-(4-methylphenyl)-7-methoxy-4-phenyl-2H-chromen-2-ol (**1b**)

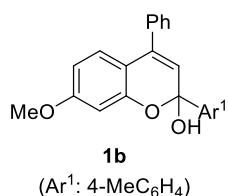

Yellow solid (586.9 mg, 1.7 mmol, 71% yield); R<sub>f</sub> = 0.51 (hexane/EtOAc = 4/1); <sup>1</sup>H NMR (600 MHz, C<sub>6</sub>D<sub>6</sub>) δ 7.60 (d, *J* = 8.4 Hz, 2H), 7.41-7.36 (m, 5H), 7.21 (d, *J* = 8.4 Hz, 2H), 7.11 (d, *J* = 9.0 Hz, 1H), 6.70 (d, *J* = 2.4 Hz, 1H), 6.53 (dd, *J* = 9.0 Hz, 2.4 Hz, 1H), 5.75 (s, 1H), 3.80 (s, 3H), 3.35 (brs, 1H), 2.36 (s, 3H); <sup>13</sup>C NMR (151 MHz, C<sub>6</sub>D<sub>6</sub>) δ 161.7, 154.0, 141.4, 138.3, 138.0, 136.6, 129.2, 129.1, 128.7, 128.2, 127.3, 126.5, 122.6, 114.2, 108.5, 102.9, 97.7, 55.0, 21.1; IR (ATR) 3370, 3027, 2955, 2835, 1613, 1505, 1444, 1357, 1275, 1199, 1160, 1113, 1031, 991, 822, 747 cm<sup>-1</sup>; HRMS (ESI) *m/z*: [M+Na]<sup>+</sup> Calcd for C<sub>23</sub>H<sub>20</sub>NaO<sub>3</sub> 367.1310, found: 367.1304.

### 2-(4-bromophenyl)-7-methoxy-4-phenyl-2H-chromen-2-ol (**1c**)

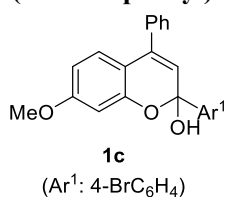

Yellow solid (458.4 mg, 1.1 mmol, 56% yield); R<sub>f</sub> = 0.51 (hexane/EtOAc = 4/1); <sup>1</sup>H NMR (600 MHz, CDCl<sub>3</sub>) δ 7.60 (d, *J* = 8.4 Hz, 2H), 7.53 (d, *J* = 8.4 Hz, 2H), 7.42-7.37 (m, 5H), 7.12 (d, *J* = 9.0 Hz, 1H), 6.70 (d, *J* = 2.4 Hz, 1H), 6.55 (dd, *J* = 8.4 Hz, 2.4 Hz, 1H), 5.71 (s, 1H), 3.82 (s, 3H), 3.35 (brs, 1H); <sup>13</sup>C NMR (151 MHz, CDCl<sub>3</sub>) δ 161.3, 152.5, 142.0, 137.2, 137.1, 131.4, 128.7, 128.4, 128.3, 127.7, 127.1, 122.7, 120.7, 113.3, 108.4, 102.3, 96.9, 55.5; IR (ATR) 3384, 3055, 2955, 2836, 1613, 1504, 1487, 1444, 1395, 1358, 1323, 1288, 1252, 1199, 1161, 1122, 1072, 1009, 830 cm<sup>-1</sup>; HRMS (ESI) *m/z*: [M+Na]<sup>+</sup> Calcd for C<sub>22</sub>H<sub>17</sub>BrNaO<sub>3</sub> 431.0259, found: 431.0253.

<sup>1</sup> M. Terada, T. Yamanaka and Y. Toda, *Chem. Eur. J.* 2013, **19**, 13658–13662.

### 7-methoxy-4-phenyl-2-(4-(trifluoromethyl)phenyl)-2H-chromen-2-ol (1d)

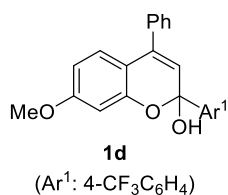

Yellow solid (652.5 mg, 1.6 mmol, 78% yield); R<sub>f</sub> = 0.50 (hexane/EtOAc = 4/1); <sup>1</sup>H NMR (600 MHz, CDCl<sub>3</sub>) δ 7.85 (d, *J* = 8.4 Hz, 2H), 7.67 (d, *J* = 8.4 Hz, 2H), 7.43-7.38 (m, 5H), 7.13 (d, *J* = 9.0 Hz, 1H), 6.71 (d, *J* = 2.4 Hz, 1H), 6.56 (dd, *J* = 9.0 Hz, 2.4 Hz, 1H), 5.71 (s, 1H), 3.82 (s, 3H), 3.42 (br, 1H); <sup>13</sup>C NMR (151 MHz, CDCl<sub>3</sub>) δ 161.4, 152.5, 146.7, 137.4, 137.2, 130.7 (q, *J* = 33.2 Hz), 128.7, 128.5, 128.3, 127.2, 126.4, 125.3 (q, *J* = 2.9 Hz), 124.1 (q, *J* = 272 Hz), 120.5, 113.3, 108.5, 102.4, 96.8, 55.5; <sup>19</sup>F NMR (565 MHz, CDCl<sub>3</sub>) δ -62.5; IR (ATR) 3357, 2955, 1613, 1505, 1325, 1275, 1164, 1125, 1068, 1019, 846, 749 cm<sup>-1</sup>; HRMS (FD+) *m/z*: [M] Calcd for C<sub>23</sub>H<sub>17</sub>F<sub>3</sub>O<sub>3</sub> 398.1130, found:398.1128.

### 2-(3-bromophenyl)-7-methoxy-4-phenyl-2H-chromen-2-ol (1e)

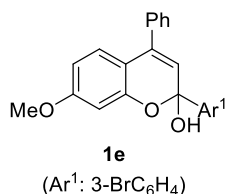

Yellow solid (424.4 mg, 1.0 mmol, 61% yield); R<sub>f</sub> = 0.55 (hexane/EtOAc = 4/1); <sup>1</sup>H NMR (600 MHz, CDCl<sub>3</sub>) δ 7.89 (t, *J* = 1.8 Hz, 1H), 7.65 (d, *J* = 7.8 Hz, 1H), 7.48 (d, *J* = 8.4 Hz, 1H), 7.42-7.35 (m, 5H), 7.28 (t, *J* = 8.4 Hz, 1H), 7.12 (d, *J* = 9.0 Hz, 1H), 6.71 (d, *J* = 2.4 Hz, 1H), 6.55 (dd, *J* = 9.0 Hz, 2.4 Hz, 1H), 5.71 (s, 1H), 3.82 (s, 3H), 3.33 (brs, 1H); <sup>13</sup>C NMR (151 MHz, CDCl<sub>3</sub>) δ 161.2, 152.5, 145.2, 137.2, 137.1, 131.5, 129.9, 129.6, 129.2, 128.7, 128.4, 128.3, 127.1, 124.6, 122.4, 120.6, 113.3, 108.4, 102.4, 96.6, 55.5; IR (ATR) 3360, 3055, 2955, 2835, 1613, 1504, 1444, 1358, 1323, 1288, 1252, 1199, 1161, 1122, 1072, 1030, 845 cm<sup>-1</sup>; HRMS (FD+) *m/z*: [M] Calcd for C<sub>22</sub>H<sub>17</sub>BrNaO<sub>3</sub> 408.0361, found: 408.0360.

### 2-(2-methylphenyl)-7-methoxy-4-phenyl-2H-chromen-2-ol (1f)

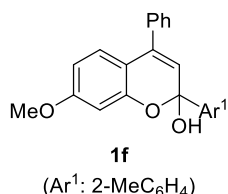

Yellow solid (529.0 mg, 1.5 mmol, 64% yield); R<sub>f</sub> = 0.53 (hexane/EtOAc = 4/1); <sup>1</sup>H NMR (600 MHz, C<sub>6</sub>D<sub>6</sub>) δ 8.06 (dd, *J* = 7.8 Hz, 1.2 Hz, 1H), 7.25-7.22 (m, 2H), 7.19-7.15 (m, 3H), 7.15-7.10 (m, 3H), 7.05 (d, *J* = 6.0 Hz, 1H), 6.73 (d, *J* = 2.4 Hz, 1H), 6.51 (dd, *J* = 9.0 Hz, 2.4 Hz, 1H), 5.54 (s, 1H), 3.25 (s, 3H), 2.75 (brs, 1H), 2.40 (s, 3H); <sup>13</sup>C NMR (151 MHz, CDCl<sub>3</sub>) δ 161.2, 152.8, 140.1, 137.5, 137.3, 136.9, 131.9, 128.8, 128.7, 128.4, 128.1, 127.1, 125.6, 125.4, 120.3, 113.3, 108.2, 102.2, 96.9, 55.4, 21.2; IR (ATR) 3357, 3063, 3008, 2965, 1613, 1541, 1444, 1357, 1275, 1198, 1162, 1110, 1032, 749 cm<sup>-1</sup>; HRMS (FD+) *m/z*: [M] Calcd for C<sub>23</sub>H<sub>20</sub>O<sub>3</sub> 344.1412, found:344.1411.

### 7-methoxy-2-phenyl-4-(p-tolyl)-2H-chromen-2-ol (1g)

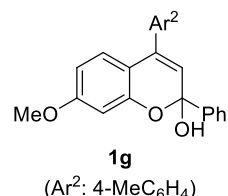

Yellow solid (702.6 mg, 2.0 mmol, 68% yield); R<sub>f</sub> = 0.35 (hexane/EtOAc = 4/1); <sup>1</sup>H NMR (600 MHz, C<sub>6</sub>D<sub>6</sub>) δ 7.80 (dm, *J* = 7.2 Hz, 2H), 7.26 (d, *J* = 8.4 Hz, 1H), 7.22 (d, *J* = 7.8 Hz, 2H), 7.19 (t, *J* = 7.8 Hz, 1H), 7.11 (t, *J* = 7.2 Hz, 1H), 6.98 (d, *J* = 8.4 Hz, 2H), 6.81 (d, *J* = 2.4 Hz, 1H), 6.54 (d, *J* = 8.4 Hz, 1H), 5.72 (s, 1H), 3.27 (s, 3H), 2.87 (br, 1H), 2.14 (s, 3H); <sup>13</sup>C NMR (151 MHz, C<sub>6</sub>D<sub>6</sub>) δ 161.8, 154.0, 144.2, 137.8, 136.7, 135.3, 129.4, 129.2, 128.42, 128.36, 127.4, 126.5, 122.0, 114.3, 108.5, 102.9, 97.7, 55.0, 21.2; IR (ATR) 3381, 3026, 2934, 1613, 1504, 1448, 1356, 1273, 1199, 1121, 1032, 816, 765, 700 cm<sup>-1</sup>; HRMS (ESI) *m/z*: [M+Na]<sup>+</sup> Calcd for C<sub>23</sub>H<sub>20</sub>NaO<sub>3</sub> 367.1310, found: 367.1304.

#### 4-(4-chlorophenyl)-7-methoxy-2-phenyl-2H-chromen-2-ol (1h)

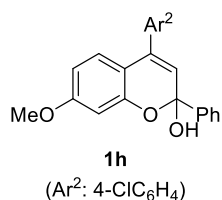

Yellow solid (488.9 mg, 1.3 mmol, 67% yield);  $R_f = 0.37$  (hexane/EtOAc = 4/1); <sup>1</sup>H NMR (600 MHz, C<sub>6</sub>D<sub>6</sub>)  $\delta$  7.77 (dd,  $J = 8.4$  Hz, 1.2 Hz, 2H), 7.19 (t,  $J = 7.8$  Hz, 2H), 7.12 (tt,  $J = 7.2$  Hz, 1.2 Hz, 1H), 7.08 (dt,  $J = 8.4$  Hz, 1.8 Hz, 2H), 7.00 (d,  $J = 8.4$  Hz, 1H), 6.91 (d,  $J = 9.0$  Hz, 2H), 6.80 (d,  $J = 2.4$  Hz, 1H), 6.54 (dd,  $J = 8.4$  Hz, 2.4 Hz, 1H), 5.54 (s, 1H), 3.27 (s, 3H), 2.75 (br, 1H); <sup>13</sup>C NMR (151 MHz, CDCl<sub>3</sub>)  $\delta$  161.3, 152.8, 143.0, 135.9, 135.7, 134.1, 130.1, 128.6, 128.5, 128.3, 126.7, 125.7, 121.5, 113.2, 108.2, 102.5, 97.1, 55.4; IR (ATR) 3408, 3060, 2959, 2837, 1612, 1566, 1504, 1489, 1448, 1354, 1275, 1199, 1160, 1089, 1014, 820, 741, 700 cm<sup>-1</sup>; HRMS (ESI)  $m/z$ : [M+Na]<sup>+</sup> Calcd for C<sub>22</sub>H<sub>17</sub>ClNaO<sub>3</sub> 387.0764, found: 387.0758.

#### 7-methoxy-4-(4-methoxyphenyl)-2-phenyl-2H-chromen-2-ol (1i)

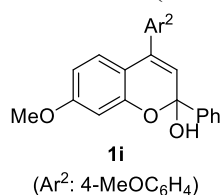

Yellow solid (800.1 mg, 2.2 mmol, 74% yield);  $R_f = 0.27$  (hexane/EtOAc = 4/1); <sup>1</sup>H NMR (600 MHz, C<sub>6</sub>D<sub>6</sub>)  $\delta$  7.74-7.72 (m, 2H), 7.42 (t,  $J = 7.8$  Hz, 2H), 7.38-7.33 (m, 3H), 7.16 (d,  $J = 9.0$  Hz, 1H), 6.94 (d,  $J = 9.0$  Hz, 2H), 6.71 (d,  $J = 2.4$  Hz, 1H), 6.55 (dd,  $J = 9.0$  Hz, 2.4 Hz, 1H), 5.74 (s, 1H), 3.84 (s, 3H), 3.82 (s, 3H), 3.35 (brs, 1H); <sup>13</sup>C NMR (151 MHz, C<sub>6</sub>D<sub>6</sub>)  $\delta$  161.8, 160.1, 154.0, 144.3, 136.4, 130.4, 128.42, 128.36, 127.4, 126.5, 121.8, 114.5, 114.2, 108.6, 102.9, 97.7, 55.0, 54.9, one carbon was not found due to overlapping; IR (ATR) 3401, 3066, 3006, 2960, 2835, 1613, 1564, 1504, 1448, 1355, 1318, 1275, 1198, 1161, 1124, 1027, 1006, 809 cm<sup>-1</sup>; HRMS (FD)  $m/z$ : [M] Calcd for C<sub>23</sub>H<sub>20</sub>O<sub>4</sub> 360.1362, found 360.1361.

#### 7-methoxy-2-phenyl-4-(3-(trifluoromethyl)phenyl)-2H-chromen-2-ol (1j)

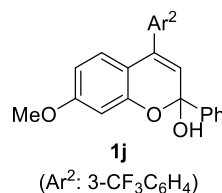

Yellow solid (541.8 mg, 1.4 mmol, 68% yield);  $R_f = 0.49$  (hexane/EtOAc = 4/1); <sup>1</sup>H NMR (600 MHz, CDCl<sub>3</sub>)  $\delta$  7.72 (d,  $J = 7.2$  Hz, 2H), 7.67 (s, 1H), 7.64 (d,  $J = 8.4$  Hz, 1H), 7.58 (d,  $J = 7.2$  Hz, 1H), 7.52 (t,  $J = 7.8$  Hz, 1H), 7.42 (t,  $J = 7.8$  Hz, 2H), 7.36 (t,  $J = 7.8$  Hz, 1H), 7.01 (d,  $J = 8.4$  Hz, 1H), 6.72 (d,  $J = 3.0$  Hz, 1H), 6.55 (dd,  $J = 9.0$  Hz, 2.4 Hz, 1H), 5.77 (s, 1H), 3.81 (s, 3H), 3.45 (brs, 1H); <sup>13</sup>C NMR (151 MHz, CDCl<sub>3</sub>)  $\delta$  161.4, 152.8, 142.9, 138.4, 135.6, 132.1, 130.9 (q,  $J = 31.9$  Hz), 128.9, 128.6, 128.4, 126.5, 125.7, 125.6 (q,  $J = 2.9$  Hz), 124.9 (q,  $J = 2.9$  Hz), 122.3 (q,  $J = 273$  Hz), 122.1, 113.0, 108.4, 102.6, 97.1, 55.5; <sup>19</sup>F NMR (565 MHz, CDCl<sub>3</sub>)  $\delta$  -62.5; IR (ATR) 3407, 3066, 2938, 2838, 1613, 1567, 1505, 1444, 1325, 1252, 1160, 1122, 1073, 1008, 804, 739 cm<sup>-1</sup>; HRMS (FD<sup>+</sup>)  $m/z$ : [M] Calcd for C<sub>23</sub>H<sub>17</sub>F<sub>3</sub>O<sub>3</sub> 421.1027, found: 421.1022.

#### 4-(3-bromophenyl)-7-methoxy-2-phenyl-2H-chromen-2-ol (1k)

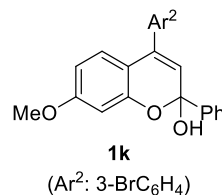

Yellow solid (442.0 mg, 1.1 mmol, 54% yield);  $R_f = 0.48$  (hexane/EtOAc = 4/1); <sup>1</sup>H NMR (600 MHz, C<sub>6</sub>D<sub>6</sub>)  $\delta$  7.75 (d,  $J = 7.2$  Hz, 2H), 7.46 (s, 1H), 7.26 (d,  $J = 7.8$  Hz, 1H), 7.19 (t,  $J = 8.4$  Hz, 2H), 7.12 (t,  $J = 7.2$  Hz, 1H), 6.98-6.95 (m, 2H), 6.78 (d,  $J = 2.4$  Hz, 1H), 6.72 (t,  $J = 7.8$  Hz, 1H), 6.45 (dd,  $J = 8.4$  Hz, 2.4 Hz, 1H), 5.48 (s, 1H), 3.26 (s, 3H), 2.73 (brs, 1H); <sup>13</sup>C NMR (151 MHz, CDCl<sub>3</sub>)  $\delta$  161.3, 152.8, 142.9, 139.6, 135.5, 131.7, 131.2, 129.9, 128.6, 128.4, 127.4, 126.7, 125.7, 122.5, 121.8, 113.1, 108.3, 102.5, 97.1, 55.5; IR (ATR) 3388, 3063, 3006, 2963, 2835, 1613, 1563, 1504, 1472, 1449, 1416, 1355, 1319, 1275, 1260, 1199, 1161, 1125, 1032, 1005, 810, 764, 750 cm<sup>-1</sup>; HRMS (FD<sup>+</sup>)  $m/z$ : [M]<sup>+</sup> Calcd for C<sub>22</sub>H<sub>17</sub>BrO<sub>3</sub> 408.0361, found: 408.0358.

### 7-methoxy-2-phenyl-4-(*o*-tolyl)-2H-chromen-2-ol (1l)

Yellow solid (743.9 mg, 2.2 mmol, 72% yield);  $R_f = 0.40$  (hexane/EtOAc = 4/1);  $^1\text{H NMR}$  (600 MHz,  $\text{CDCl}_3$ , mixture of two rotamers)  $\delta$  7.73-7.70 (m, 2H), 7.43-7.39 (m, 2H), 7.37-7.33 (m, 1H), 7.30-7.06 (m, 4H), 6.71-6.67 (m, 2H), 6.48-6.45 (m, 1H), 5.67-5.65 (m, 1H), 3.81-3.79 (m, 3H), 3.47-3.33 (m, 1H), 2.32-2.05 (m, 3H);  $^{13}\text{C NMR}$  (151 MHz,  $\text{CDCl}_3$ , mixture of two rotamers)  $\delta$  161.1, 152.4, 152.1, 143.21, 143.17, 136.9, 136.8, 136.4, 136.24, 136.21, 135.9, 133.1, 130.0, 129.5, 129.3, 128.5, 128.4, 128.32, 128.29, 128.1, 127.9, 126.8, 126.6, 125.8, 125.72, 125.69, 125.64, 121.4, 113.7, 113.6, 108.3, 108.1, 102.2, 102.0, 97.5, 97.3, 55.4, 19.7, some carbons were not found due to overlapping; IR (ATR) 3420, 3060, 3015, 2951, 2836, 1613, 1504, 1448, 1356, 1273, 1199, 1121, 1032, 814, 765, 700  $\text{cm}^{-1}$ ; HRMS (ESI)  $m/z$ :  $[\text{M}+\text{Na}]^+$  Calcd for  $\text{C}_{23}\text{H}_{20}\text{NaO}_3$  367.1310, found: 367.1305.

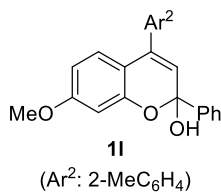

### 5-methoxy-2,4-diphenyl-2H-chromen-2-ol (1n)

Yellow solid (463 mg, 1.4 mmol, 70% yield);  $R_f = 0.39$  (hexane/EtOAc = 4/1);  $^1\text{H NMR}$  (600 MHz,  $\text{CDCl}_3$ )  $\delta$  8.00 (dd,  $J = 8.4$  Hz, 1.8 Hz, 2H), 7.55 (tt,  $J = 7.2$  Hz, 1.2 Hz, 1H), 7.49 (s, 1H), 7.46-7.41 (m, 4H), 7.37-7.32 (m, 3H), 7.20 (t,  $J = 8.4$  Hz, 1H), 6.68 (dd,  $J = 8.4$  Hz, 1.2 Hz, 1H), 6.43 (dd,  $J = 8.4$  Hz, 0.6 Hz, 1H), 6.11 (brs, 1H), 3.49 (s, 3H);  $^{13}\text{C NMR}$  (151 MHz,  $\text{CDCl}_3$ )  $\delta$  193.3, 157.5, 154.6, 146.6, 140.2, 137.5, 133.1, 130.0, 129.2, 128.8, 128.5, 128.4, 127.0, 126.2, 116.0, 110.2, 103.7, 55.6; IR (ATR) 3336, 3057, 3020, 2937, 2836, 2372, 2350, 1595, 1489, 1466, 1448, 1437, 1362, 1264, 1218, 1177, 1087, 1041, 1020  $\text{cm}^{-1}$ ; HRMS (ESI)  $m/z$ :  $[\text{M}+\text{Na}]^+$  Calcd for  $\text{C}_{22}\text{H}_{18}\text{NaO}_3$  353.1154, found: 353.1149.

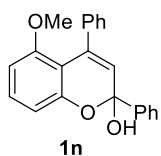

### 7-methyl-2,4-diphenyl-2H-chromen-2-ol (1o)

Yellow solid (434 mg, 1.4 mmol, 69% yield);  $R_f = 0.50$  (hexane/EtOAc = 4/1);  $^1\text{H NMR}$  (600 MHz,  $\text{CDCl}_3$ )  $\delta$  7.70 (d,  $J = 8.4$  Hz, 2H), 7.21-7.18 (m, 2H), 7.13-7.02 (m, 7H), 6.92 (s, 1H), 6.56 (d,  $J = 7.8$  Hz, 1H), 5.68 (s, 1H), 3.54 (s, 1H), 2.02 (s, 3H);  $^{13}\text{C NMR}$  (151 MHz,  $\text{CDCl}_3$ )  $\delta$  152.4, 144.2, 140.4, 138.1, 136.7, 129.3, 128.7, 128.4, 126.5, 126.2, 124.0, 122.5, 118.4, 97.3, 21.4, some carbons were not found due to overlapping; IR (ATR) 3527, 3393, 3058, 2920, 2279, 1563, 1490, 1447, 1417, 1355, 1329, 1309, 1219, 1169, 1154, 1123, 1076, 1010, 920  $\text{cm}^{-1}$ ; HRMS (ESI)  $m/z$ :  $[\text{M}+\text{Na}]^+$  Calcd for  $\text{C}_{22}\text{H}_{18}\text{NaO}_2$  337.1204, found: 337.1200.

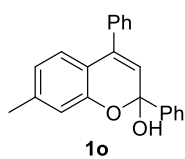

### 7-fluoro-2,4-diphenyl-2H-chromen-2-ol (1p)

Yellow solid (471 mg, 1.5 mmol, 74% yield);  $R_f = 0.49$  (hexane/EtOAc = 4/1);  $^1\text{H NMR}$  (600 MHz,  $\text{CDCl}_3$ )  $\delta$  7.60-7.57 (m, 2H), 7.11-7.02 (m, 10H), 6.94 (dd,  $J = 9.0$  Hz, 6.6 Hz, 1H), 6.82 (dd,  $J = 10.8$  Hz, 3.0 Hz, 1H), 6.40 (dt,  $J = 7.8$  Hz, 2.4 Hz, 1H), 5.58 (s, 1H), 2.67 (s, 1H);  $^{13}\text{C NMR}$  (151 MHz,  $\text{CDCl}_3$ )  $\delta$  164.0 (d,  $J = 248.7$  Hz), 153.8 (d,  $J = 13.0$  Hz), 147.7, 136.2, 129.1, 128.5, 128.4, 127.7, 127.6, 126.3, 123.8, 117.5, 108.6 (d,  $J = 21.7$  Hz), 105.3 (d,  $J = 26.0$  Hz), 97.6, some carbons were not found due to overlapping;  $^{19}\text{F NMR}$  (565 MHz,  $\text{CDCl}_3$ )  $\delta$  -110.3 to -110.4 (m); IR (ATR) 3544, 3370, 3059, 2354, 1810, 1581, 1498,

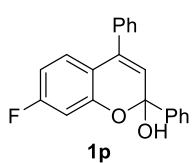

1491, 1447, 1355, 1313, 1273, 1218, 1175, 1144, 1107, 1078, 995  $\text{cm}^{-1}$ ; HRMS (ESI)  $m/z$ :  $[\text{M}+\text{Na}]^+$  Calcd for  $\text{C}_{21}\text{H}_{15}\text{FNaO}_2$  341.0954, found: 341.0949.

### 3. Preparation of Catalyst

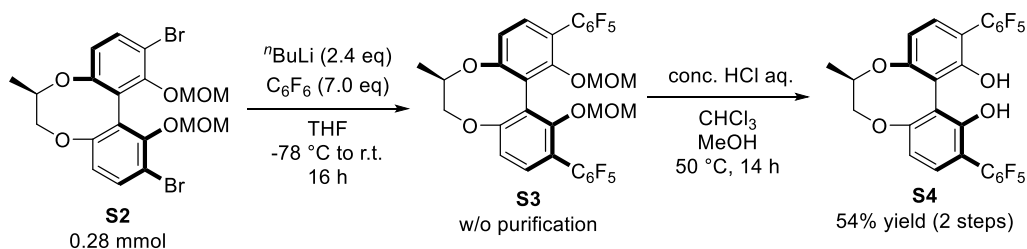

To a solution of **S2** (141.2 mg, 0.28 mmol) in THF (1.4 mL),  $n\text{BuLi}$  (1.6 M in hexane, 0.42 mL, 0.67 mmol) was added slowly at  $-78\text{ }^\circ\text{C}$ , and the reaction mixture was stirred at  $-78\text{ }^\circ\text{C}$  for 1 h. To the resulting solution was added  $\text{C}_6\text{F}_6$  (4.2 M in THF, 0.48 mL, 2.0 mmol) at  $-78\text{ }^\circ\text{C}$ . The reaction mixture allowed warming at room temperature and stirred for 12 h. The reaction was quenched with saturated  $\text{NH}_4\text{Cl}$  aq. and the aqueous layer was extracted with  $\text{CH}_2\text{Cl}_2$ . The combined organic extracts were washed with brine, dried over  $\text{Na}_2\text{SO}_4$  and concentrated under reduced pressure after filtration. The residual crude product was used for next step without purification.

To the solution of crude **S3** in MeOH (4.7 mL) and  $\text{CH}_2\text{Cl}_2$  (4.7 mL) was added conc HCl aq. (0.2 mL) at room temperature. The reaction mixture was stirred for 14 h at  $50\text{ }^\circ\text{C}$ . After cooling to  $0\text{ }^\circ\text{C}$ , saturated  $\text{NaHCO}_3$  solution (5.0 mL) was added. The resulting mixture was extracted with  $\text{CH}_2\text{Cl}_2$ , and the combined extracts were washed with brine, dried over  $\text{Na}_2\text{SO}_4$  and concentrated under reduced pressure after filtration. The residual crude product was chromatographed on silica gel (hexane/EtOAc = 4:1 to hexane/ $\text{CH}_2\text{Cl}_2$  = 1:2) to give the product **S4** as white solid (89.3 mg, 54% yield).

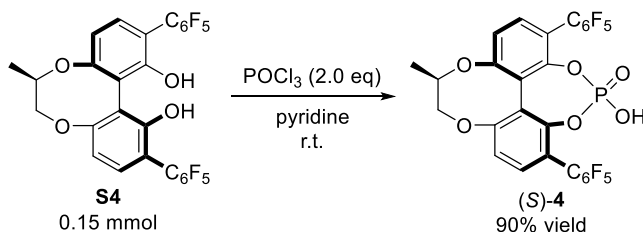

To the solution of **S4** (88.6 mg, 0.15 mmol) in pyridine (1.5 mL) was slowly added  $\text{POCl}_3$  (46.0 mg, 0.3 mmol). The reaction mixture was stirred at room temperature for 12 h. To the resulting solution was added  $\text{H}_2\text{O}$  (1.0 mL) at room temperature, and then the reaction mixture was stirred for additional 30 min. After cooling to  $0\text{ }^\circ\text{C}$ , 6 M HCl aq. (2.0 mL) was added and aqueous layer was extracted with  $\text{CH}_2\text{Cl}_2$ . The combined extracts were washed with 6 M HCl aq., dried over  $\text{Na}_2\text{SO}_4$  and concentrated under reduced pressure. The residual crude product was chromatographed on silica gel ( $\text{CH}_2\text{Cl}_2/\text{MeOH}$  = 5:1). The obtained product was dissolved in  $\text{Et}_2\text{O}$ , washed with 6 M HCl aq. (x3), dried over  $\text{Na}_2\text{SO}_4$  and concentrated under reduced pressure to give the product **1c** as white solid (88.1 mg, 90% yield).



**(R)-6-methyl-2,11-bis(6,6,6,6-pentafluoro-6l8-hexa-1,3,5-triyn-1-yl)-6,7-dihydrodibenzo[e,g][1,4]dioxocine-1,12-diol (S4)**

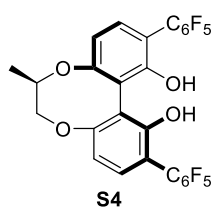

White solid (89.3 mg, 0.15 mmol, 54% yield);  $[\alpha]^{25.3}_D = +64.5$  ( $c = 0.5$ ,  $\text{CHCl}_3$ , >99% ee);  $R_f = 0.38$  (hexane/EtOAc = 4/1);  $^1\text{H NMR}$  (600 MHz,  $\text{CDCl}_3$ )  $\delta$  7.31 (t,  $J = 9.0$  Hz, 2H), 6.95 (dd,  $J = 8.4$  Hz, 4.2 Hz, 2H), 5.60 (s, 1H), 5.57 (s, 1H), 4.45 (dd,  $J = 12.0$  Hz, 3.6 Hz, 1H), 4.39-4.32 (m, 1H), 3.81 (dd,  $J = 12.0$  Hz, 10.2 Hz, 1H), 1.37 (d,  $J = 6.6$  Hz, 3H);  $^{13}\text{C NMR}$  (151 MHz,  $\text{CDCl}_3$ )  $\delta$  161.3, 160.8, 150.9, 150.8, 144.4 (dm,  $J = 251.6$  Hz), 140.7 (dm,  $J = 258.8$  Hz), 137.6 (dm,  $J = 250.1$  Hz),

133.2, 116.1, 116.0, 115.54, 115.49, 112.2-111.8 (m), 81.8, 79.0, 16.8, some carbon were not found due to overlapping;  $^{19}\text{F NMR}$  (565 MHz,  $\text{CDCl}_3$ )  $\delta$  -139.3 to -139.5 (m, 2F), -139.8 to -140.0 (m, 2F), -154.8 to -154.9 (m, 2F), -162.1 to -162.4 (m, 4F); IR (ATR) 3299, 2983, 2937, 1654, 1603, 1582, 1522, 1496, 1450, 1408, 1323, 1283, 1255, 1218, 1167, 1133, 1060, 1049, 1026, 984, 916, 863, 825  $\text{cm}^{-1}$ ; HRMS (FD+)  $m/z$ : [M] Calcd for  $\text{C}_{27}\text{H}_{12}\text{F}_{10}\text{O}_4$  590.0576, found: 590.0574.

**(6R,12aS)-14-hydroxy-6-methyl-2,11-bis(6,6,6,6-pentafluoro-6l8-hexa-1,3,5-triyn-1-yl)-6,7-dihydro-1,12-(epoxyphosphanoxy)dibenzo[e,g][1,4]dioxocine 14-oxide ((S)-4)**

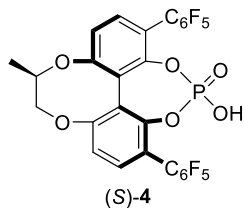

White solid (88.1 mg, 0.14 mmol, 90% yield);  $[\alpha]^{25.0}_D = +7.2$  ( $c = 1.0$ ,  $\text{CHCl}_3$ , >99% ee);  $R_f = 0.56$  (EtOAc);  $^1\text{H NMR}$  (600 MHz,  $\text{CDCl}_3$ )  $\delta$  7.40 (t,  $J = 9.0$  Hz, 2H), 7.25 (ddd,  $J = 8.4$  Hz, 3.6 Hz, 1.2 Hz, 2H), 4.87 (brs, 1H), 4.54 (dd,  $J = 12.0$  Hz, 3.0 Hz, 1H), 4.45-4.38 (m, 1H), 3.88 (dd,  $J = 11.4$  Hz, 10.8 Hz, 1H), 1.44 (d,  $J = 6.0$  Hz);  $^{13}\text{C NMR}$  (151 MHz,  $\text{CDCl}_3$ )  $\delta$  160.6, 160.3, 145.8 (t,  $J = 7.1$  Hz), 144.3 (dm,  $J = 257.3$  Hz), 141.4 (dm,  $J = 252.9$  Hz), 137.7 (dm,  $J = 250.1$  Hz), 137.4 (dm,

$J = 261.7$  Hz), 133.1, 133.0, 120.9, 120.8, 120.1, 120.0, 115.8, 115.7, 110.1 (t,  $J = 17.4$  Hz), 80.8, 78.2, 17.1, some carbon were not found due to overlapping;  $^{31}\text{P NMR}$  (243 MHz,  $\text{CDCl}_3$ )  $\delta$  2.49;  $^{19}\text{F NMR}$  (565 MHz,  $\text{CDCl}_3$ )  $\delta$  -138.4 to -138.7 (m, 2F), -140.7 to -140.9 (m, 2F), -154.2 to -154.4 (m, 2F), -162.2 to -162.5 (m, 2F), -162.7 to -162.9 (m, 2F); IR (ATR) 2983, 2931, 1608, 1570, 1524, 1496, 1452, 1414, 1277, 1226, 1122, 1053, 1029, 991, 927, 893, 864, 836  $\text{cm}^{-1}$ ; HRMS (FD+)  $m/z$ : [M] Calcd for  $\text{C}_{27}\text{H}_{11}\text{F}_{10}\text{O}_6\text{P}$  652.0134, found: 652.0129.

#### 4. Radical addition reaction between chromenol and toluene derivatives

Representative procedure for the radical addition reaction of **1** with **2**

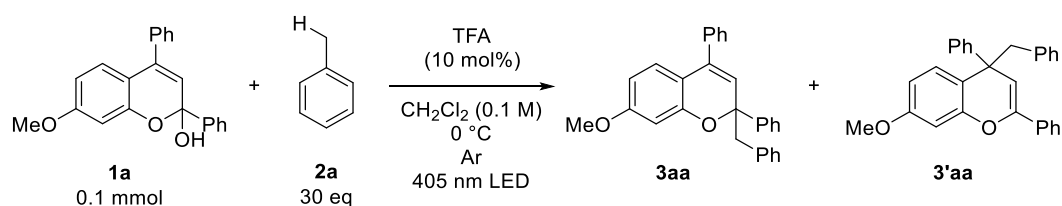

To a mixture of **1a** (33.0 mg, 0.1 mmol) and **2a** (276.4 mg, 3.0 mmol) was added TFA (10 mol%, 1.1 mg, 0.01 mmol) in CH<sub>2</sub>Cl<sub>2</sub> (1.0 ml) at -0 °C under argon atmosphere. The resulting mixture was stirred at 0 °C for 2 h under LED irradiation (405 nm). The reaction was quenched with sat. NaHCO<sub>3</sub> aq., and the aqueous phase was extracted with EtOAc. The combined organic phases were dried over Na<sub>2</sub>SO<sub>4</sub>, and evaporated. The residue was purified by column chromatography (hexane/EtOAc = 10/1) to give a corresponding product as a mixture of regioisomers (32.8 mg, 81% yield, **3aa/3'aa** = 95/5).

#### 2-benzyl-7-methoxy-2,4-diphenyl-2H-chromene (**3aa**)

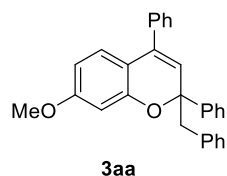

Colorless oil (32.8 mg, 0.08 mmol, 81% yield, **3aa/3'aa** = 95/5);  $R_f$  = 0.41 (hexane/EtOAc = 10/1); <sup>1</sup>H NMR (600 MHz, CDCl<sub>3</sub>) δ 7.45-7.42 (m, 2H), 7.40-7.33 (m, 3H), 7.32-7.27 (m, 4H), 7.22 (tt,  $J$  = 7.8 Hz, 1.8 Hz), 7.16-7.13 (m, 3H), 7.00-7.96 (m, 2H), 6.82 (d,  $J$  = 8.4 Hz, 1H), 6.59 (d,  $J$  = 2.4 Hz, 1H), 6.32 (dd,  $J$  = 8.4 Hz, 2.4 Hz, 1H), 5.91 (s, 1H), 3.79 (s, 3H), 3.39-3.34 (m, 2H); <sup>13</sup>C NMR (151 MHz, CDCl<sub>3</sub>) δ 160.7, 154.6, 144.4, 138.5, 135.92, 135.89, 130.9, 128.7, 128.3, 127.9, 127.7, 127.6, 127.2, 126.6, 126.3, 125.8, 123.6, 115.9, 106.5, 102.5, 81.3, 55.4, 48.8; IR (ATR) 3083, 3058, 3027, 3003, 2935, 2834, 1611, 1567, 1503, 1493, 1444, 1355, 1314, 1271, 1196, 1124, 1075, 1031, 1000, 912, 837, 808, 758, 737 cm<sup>-1</sup>; HRMS (ESI)  $m/z$ : [M+Na]<sup>+</sup> Calcd for C<sub>29</sub>H<sub>24</sub>NaO<sub>2</sub> 427.1674, Found 427.1669.

#### 2-benzyl-7-methoxy-4-phenyl-2-(*p*-tolyl)-2H-chromene (**3ba**)

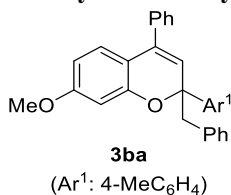

Colorless oil (30.6 mg, 0.07 mmol, 73% yield, **3ba/3'ba** = 93/7);  $R_f$  = 0.39 (hexane/EtOAc = 10/1); <sup>1</sup>H NMR (600 MHz, CDCl<sub>3</sub>) δ 7.39-7.30 (m, 7H), 7.16-7.14 (m, 3H), 7.09 (d,  $J$  = 7.8 Hz, 2H), 7.01-6.99 (m, 2H), 6.80 (d,  $J$  = 8.4 Hz, 1H), 6.57 (d,  $J$  = 2.4 Hz, 1H), 6.30 (dd,  $J$  = 8.4 Hz, 3.0 Hz, 1H), 5.89 (s, 1H), 3.79 (s, 3H), 3.37 (d,  $J$  = 13.8 Hz, 1H), 3.33 (d,  $J$  = 13.8 Hz, 1H), 2.31 (s, 3H); <sup>13</sup>C NMR (151 MHz, CDCl<sub>3</sub>) δ 160.6, 154.6, 141.4, 138.6, 136.7, 136.0, 135.8, 130.9, 128.7, 128.6, 128.2, 127.65, 127.57, 126.5, 126.3, 125.7, 123.7, 115.9, 106.4, 102.5, 81.2, 55.3, 48.8, 21.1; IR (ATR) 3082, 3058, 3028, 2919, 2836, 2356, 1567, 1504, 1443, 1356, 1318, 1276, 1217, 1198, 1159, 1125, 1075, 994, 837 cm<sup>-1</sup>; HRMS (FD+)  $m/z$ : [M] Calcd for C<sub>30</sub>H<sub>26</sub>O<sub>2</sub> 418.1933, Found: 418.1932.

### 2-benzyl-2-(4-bromophenyl)-7-methoxy-4-phenyl-2H-chromene (3ca)

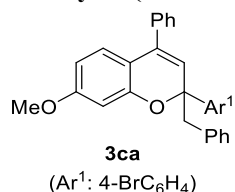

Colorless oil (29.5 mg, 0.06 mmol, 61% yield, **3ca/3'ca** = 95/5); R<sub>f</sub> = 0.48 (hexane/EtOAc = 10/1); <sup>1</sup>H NMR (600 MHz, CDCl<sub>3</sub>) δ 7.41-7.35 (m, 5H), 7.32-7.28 (m, 4H), 7.18-7.15 (m, 3H), 6.99-6.95 (m, 2H), 6.83 (d, *J* = 8.4 Hz), 6.58 (d, *J* = 2.4 Hz, 1H), 6.34 (dd, *J* = 8.4 Hz, 3.0 Hz, 1H), 5.88 (s, 1H), 3.80 (s, 3H), 3.35 (d, *J* = 13.8 Hz, 1H), 3.32 (d, *J* = 13.8 Hz, 1H); <sup>13</sup>C NMR (151 MHz, CDCl<sub>3</sub>) δ 160.8, 154.3, 143.4, 138.3, 136.4, 135.4, 130.94, 130.89, 128.7, 128.3, 127.9, 127.7, 126.7, 126.5, 122.8, 121.2, 115.9, 106.7, 102.6, 80.8, 55.4, 48.6; IR (ATR) 3480, 3409m 2921, 2853, 1612, 1522, 1455, 1412, 1275, 1160, 1198, 1160, 1111, 1073, 1010, 818, 700 cm<sup>-1</sup>; HRMS (ESI) m/z: [M+Na]<sup>+</sup> Calcd for C<sub>29</sub>H<sub>23</sub>BrNaO<sub>2</sub> 505.0779, Found: 505.0773.

### 2-benzyl-7-methoxy-4-phenyl-2-(4-(trifluoromethyl)phenyl)-2H-chromene (3da)

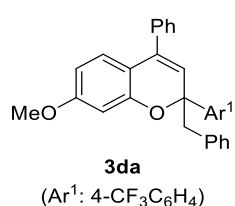

Colorless oil (28.4 mg, 0.06 mmol, 60% yield, **3da/3'da** = 90/10); R<sub>f</sub> = 0.40 (hexane/EtOAc = 10/1); <sup>1</sup>H NMR (600 MHz, CDCl<sub>3</sub>) δ 7.53 (m, 4H), 7.40-7.34 (m, 3H), 7.31-7.29 (m, 2H), 7.18-7.15 (m, 3H), 6.98-6.95 (m, 2H), 6.84 (d, *J* = 8.4 Hz, 1H), 6.61 (d, *J* = 2.4 Hz, 1H), 6.35 (dd, *J* = 8.4 Hz, 2.4 Hz, 1H), 5.92 (s, 1H), 3.80 (s, 3H), 3.37 (d, *J* = 13.8 Hz, 1H), 3.35 (d, *J* = 13.8 Hz, 1H); <sup>13</sup>C NMR (151 MHz, CDCl<sub>3</sub>) δ 160.9, 154.3, 148.5, 138.2, 136.7, 135.3, 130.9, 129.2 (q, *J* = 33.2 Hz), 128.7, 128.3, 127.9, 127.7, 126.8, 126.6, 126.2, 124.9 (q, *J* = 2.9 Hz), 124.1 (q, *J* = 273.3 Hz), 122.7, 115.7, 106.8, 102.6, 80.9, 55.4, 48.7; <sup>19</sup>F NMR (565 MHz, CDCl<sub>3</sub>) δ -62.3; IR (ATR) 3063, 3029, 2936, 1613, 1567, 1504, 1444, 1408, 1323, 1275, 1160, 1122, 1068, 1033, 841, 764, 700 cm<sup>-1</sup>; HRMS (FD+) m/z: [M] Calcd for C<sub>30</sub>H<sub>23</sub>F<sub>3</sub>O<sub>2</sub> 472.1650, Found: 472.1649.

### 2-benzyl-2-(3-bromophenyl)-7-methoxy-4-phenyl-2H-chromene (3ea)

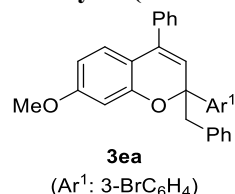

Colorless oil (30.0 mg, 0.06 mmol, 62% yield, **3ea/3'ea** = 97/3); R<sub>f</sub> = 0.43 (hexane/EtOAc = 10/1); <sup>1</sup>H NMR (600 MHz, CDCl<sub>3</sub>) δ 7.58 (t, *J* = 1.8 Hz, 1H), 7.441-7.32 (m, 5H), 7.32-7.29 (m, 2H), 7.18-7.16 (m, 3H), 7.14 (t, *J* = 7.8 Hz, 1H), 7.00-6.96 (m, 2H), 6.84 (d, *J* = 9.0 Hz, 1H), 6.60 (d, *J* = 3.0 Hz, 1H), 6.35 (dd, *J* = 9.0 Hz, 2.4 Hz, 1H), 5.85 (s, 1H), 3.80 (s, 3H), 3.34-3.32 (m, 2H); <sup>13</sup>C NMR (151 MHz, CDCl<sub>3</sub>) δ 160.9, 154.3, 146.9, 138.3, 136.5, 135.4, 130.9, 130.3, 129.5, 129.0, 128.7, 128.3, 127.9, 127.7, 126.7, 126.6, 124.5, 122.7, 122.2, 115.7, 106.8, 102.6, 80.8, 55.4, 48.7; IR (ATR) 3028, 2992, 2952, 2918, 2835, 1611, 1563, 1502, 1468, 1356, 1316, 1275, 1197, 1161, 1126, 1032, 763, 749, 699 cm<sup>-1</sup>; HRMS (ESI) m/z: [M+Na]<sup>+</sup> Calcd for C<sub>29</sub>H<sub>23</sub>BrNaO<sub>2</sub> 505.0779, Found: 505.0774.

### 2-benzyl-7-methoxy-4-phenyl-2-(*o*-tolyl)-2H-chromene (3fa)

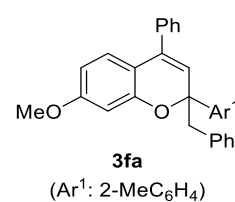

Colorless oil (35.6 mg, 0.09 mmol, 85% yield, **3fa/3'fa** = 93/7); R<sub>f</sub> = 0.44 (hexane/EtOAc = 10/1); <sup>1</sup>H NMR (600 MHz, CDCl<sub>3</sub>) δ 7.41 (d, *J* = 7.8 Hz, 1H), 7.39-7.33 (m, 3H), 7.31-7.28 (m, 2H), 7.16-7.12 (m, 5H), 7.07-7.02 (m, 3H), 6.77 (d, *J* = 7.8 Hz, 1H), 6.56 (d, *J* = 2.4 Hz, 1H), 6.29 (dd, *J* = 8.4 Hz, 2.4 Hz, 1H), 5.87 (s, 1H), 3.77 (s, 3H), 3.52 (d, *J* = 13.8 Hz, 1H), 3.46 (d, *J* = 13.8 Hz, 1H), 2.64 (s, 3H); <sup>13</sup>C NMR (151 MHz, CDCl<sub>3</sub>) δ 160.6, 154.8, 141.9, 138.7, 136.13, 136.12, 135.4, 132.4, 131.0, 128.7, 128.3, 127.64, 127.58, 127.51, 127.3, 126.6, 126.4, 125.2, 123.5, 116.0, 106.4, 102.2, 82.6, 55.3, 46.9, 22.3; IR (ATR) 3059, 3027, 2958, 2931, 2835, 1613, 1567, 1504, 1455, 1443, 1357, 1314, 1285, 1196, 1160, 1125, 1075,

1032, 988, 910, 836, 804, 762, 734, 700, 671, 648  $\text{cm}^{-1}$ ; HRMS (ESI)  $m/z$ :  $[\text{M}+\text{Na}]^+$  Calcd for  $\text{C}_{30}\text{H}_{26}\text{NaO}_2$  441.1830, Found: 441.1825.

### 2-benzyl-7-methoxy-2-phenyl-4-(*p*-tolyl)-2H-chromene (3ga)

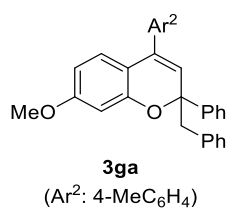

Colorless oil (37.7 mg, 0.09 mmol, 86% yield, **3ga**/**3'ga** = 96/4);  $R_f$  = 0.42 (hexane/EtOAc = 10/1);  $^1\text{H}$  NMR (600 MHz,  $\text{CDCl}_3$ )  $\delta$  7.43 (d,  $J$  = 8.4 Hz, 2H), 7.28 (t,  $J$  = 7.2 Hz, 2H), 7.23-7.17 (m, 5H), 7.15-7.12 (m, 3H), 6.99-6.95 (m, 2H), 6.83 (d,  $J$  = 8.4 Hz, 1H), 6.58 (d,  $J$  = 2.4 Hz, 1H), 6.31 (dd,  $J$  = 8.4 Hz, 2.4 Hz, 1H), 5.90 (s, 1H), 3.79 (s, 3H), 3.36-3.34 (m, 2H), 2.39 (s, 3H);  $^{13}\text{C}$  NMR (151 MHz,  $\text{CDCl}_3$ )  $\delta$  160.6, 154.6, 144.5, 137.5, 135.9, 135.8, 135.6, 130.9, 128.9, 128.6, 127.9, 127.6, 127.1, 126.6, 126.3, 125.8, 123.2, 116.0, 106.5, 102.5, 81.3, 55.4, 48.9, 21.2; IR (ATR) 3057, 3004, 2921, 1611, 1501, 1445, 1275, 1261, 1197, 1160, 1125, 1032, 814  $\text{cm}^{-1}$ ; HRMS (FD+)  $m/z$ :  $[\text{M}]$  Calcd for  $\text{C}_{30}\text{H}_{26}\text{O}_2$  418.1933, Found: 418.1931.

### 2-benzyl-4-(4-chlorophenyl)-7-methoxy-2-phenyl-2H-chromene (3ha)

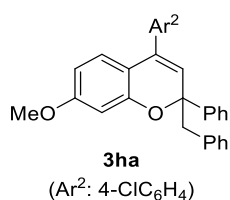

Colorless oil (39.9 mg, 0.09 mmol, 91% yield, **3ha**/**3'ha** = 93/7);  $R_f$  = 0.39 (hexane/EtOAc = 10/1);  $^1\text{H}$  NMR (600 MHz,  $\text{CDCl}_3$ )  $\delta$  7.43-7.41 (m, 2H), 7.34 (dt,  $J$  = 9.0 Hz, 2.4 Hz, 2H), 7.29 (tt,  $J$  = 7.8 Hz, 1.8 Hz, 2H), 7.25-7.21 (m, 3H), 7.16-7.14 (m, 3H), 6.99-6.95 (m, 2H), 6.76 (d,  $J$  = 9.0 Hz, 1H), 6.59 (d,  $J$  = 2.4 Hz, 1H), 6.32 (dd,  $J$  = 9.0 Hz, 2.4 Hz, 1H), 5.90 (s, 1H), 3.80 (s, 3H), 3.40-3.30 (m, 1H);  $^{13}\text{C}$  NMR (151 MHz,  $\text{CDCl}_3$ )  $\delta$  160.9, 154.6, 144.2, 136.9, 135.8, 135.0, 133.6, 130.9, 130.1, 128.5, 127.9, 127.6, 127.2, 126.4, 126.3, 125.7, 123.9, 115.5, 106.6, 102.7, 81.3, 55.4, 48.8; IR (ATR) 3061, 3029, 2931, 2835, 1612, 1504, 1489, 1444, 1353, 1316, 1275, 1197, 1160, 1125, 1089, 1032, 1014, 1001, 911, 837, 749, 699  $\text{cm}^{-1}$ ; HRMS (ESI)  $m/z$ :  $[\text{M}+\text{Na}]^+$  Calcd for  $\text{C}_{29}\text{H}_{23}\text{ClNaO}_2$  461.1284, Found: 461.1279.

### 2-benzyl-7-methoxy-4-(4-methoxyphenyl)-2-phenyl-2H-chromene (3ia)

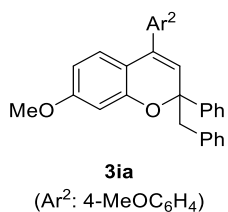

White solid (13.0 mg, 0.03 mmol, 29% yield, **3ia**/**3'ia** = 95/5);  $R_f$  = 0.73 (hexane/EtOAc = 4/1);  $^1\text{H}$  NMR (600 MHz,  $\text{CDCl}_3$ )  $\delta$  7.43 (d,  $J$  = 7.2 Hz, 2H), 7.28 (t,  $J$  = 7.2 Hz, 2H), 7.25 (dt,  $J$  = 8.4 Hz, 2.4 Hz, 2H), 7.21 (t,  $J$  = 7.2 Hz, 1H), 7.16-7.12 (m, 3H), 6.99-6.95 (m, 2H), 6.91 (dt,  $J$  = 9.0 Hz, 2.4 Hz, 2H), 6.84 (d,  $J$  = 8.4 Hz, 1H), 6.59 (d,  $J$  = 2.4 Hz, 1H), 6.32 (dd,  $J$  = 9.0 Hz, 3.0 Hz, 1H), 5.88 (s, 1H), 3.84 (s, 3H), 3.79 (s, 3H), 3.36-3.34 (m, 2H);  $^{13}\text{C}$  NMR (151 MHz,  $\text{CDCl}_3$ )  $\delta$  160.7, 159.2, 154.7, 144.5, 136.0, 135.5, 130.9, 129.9, 127.9, 127.6, 127.1, 126.6, 126.3, 125.8, 123.0, 116.2, 113.7, 106.5, 102.6, 81.3, 55.4, 55.3, 48.9; IR (ATR) 2936, 2878, 2356, 1739, 1510, 1453, 1254, 1162, 1111, 1031, 830  $\text{cm}^{-1}$ ; HRMS (FD+)  $m/z$ :  $[\text{M}]$  Calcd for  $\text{C}_{30}\text{H}_{26}\text{O}_3$  434.1882, Found: 434.1880.

### 2-benzyl-7-methoxy-2-phenyl-4-(3-(trifluoromethyl)phenyl)-2H-chromene (3ja)

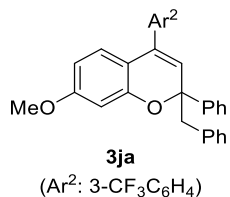

Colorless oil (42.5 mg, 0.09 mmol, 90% yield, **3ja**/**3'ja** = 94/6);  $R_f$  = 0.46 (hexane/EtOAc = 10/1);  $^1\text{H}$  NMR (600 MHz,  $\text{CDCl}_3$ )  $\delta$  7.61 (d,  $J$  = 6.6 Hz, 1H), 7.55 (s, 1H), 7.51-7.46 (m, 2H), 7.45-7.42 (m, 2H), 7.31 (t,  $J$  = 7.2 Hz, 2H), 7.23 (tt,  $J$  = 7.8 Hz, 1.2 Hz, 1H), 7.17-7.15 (m, 3H), 7.01-6.98 (m, 2H), 6.71 (d,  $J$  = 8.4 Hz, 1H), 6.61 (d,  $J$  = 2.4 Hz, 1H), 6.33 (dd,  $J$  = 8.4 Hz, 3.0 Hz, 1H), 5.93 (s,

1H), 3.80 (s, 3H), 3.39-3.35 (m, 2H); <sup>13</sup>C NMR (151 MHz, CDCl<sub>3</sub>) δ 161.1, 154.6, 144.2, 139.4, 135.8, 134.9, 132.1, 130.9, 130.8 (q, *J* = 33.2 Hz), 128.8, 128.0, 127.6, 127.3, 126.5, 126.2, 125.7, 125.4 (q, *J* = 4.4 Hz), 124.6, 124.5 (q, *J* = 2.9 Hz), 124.1 (q, *J* = 254.6 Hz), 115.2, 106.7, 102.7, 81.4, 55.4, 48.8; <sup>19</sup>F NMR (565 MHz, CDCl<sub>3</sub>) δ -62.4; IR (ATR) 3063, 3030, 2935, 2916, 2837, 1613, 1504, 1443, 1327, 1276, 1259, 1161, 1125, 1032, 910, 806, 750, 700 cm<sup>-1</sup>; HRMS (ESI) *m/z*: [M+Na]<sup>+</sup> Calcd for C<sub>30</sub>H<sub>23</sub>F<sub>3</sub>NaO<sub>2</sub> 495.1548, Found: 495.1542.

### 2-benzyl-4-(3-bromophenyl)-7-methoxy-2-phenyl-2H-chromene (3ka)

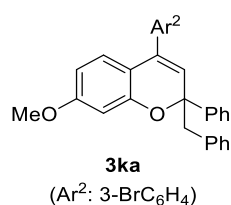

Colorless oil (32.9 mg, 0.07 mmol, 68% yield, **3ka/3'ka** = 96/4); R<sub>f</sub> = 0.45 (hexane/EtOAc = 10/1); <sup>1</sup>H NMR (600 MHz, CDCl<sub>3</sub>) δ 7.49-7.45 (m, 2H), 7.44-7.41 (m, 2H), 7.30 (t, *J* = 7.8 Hz, 2H), 7.25-7.21 (m, 3H), 7.17-7.14 (3H), 6.99-6.96 (m, 2H), 6.77 (d, *J* = 8.4 Hz, 1H), 6.59 (d, *J* = 3.0 Hz, 1H), 6.34 (dd, *J* = 8.4 Hz, 2.4 Hz, 1H), 5.91 (s, 1H), 3.80 (s, 3H), 3.38-3.32 (m, 2H); <sup>13</sup>C NMR (151 MHz, CDCl<sub>3</sub>) δ 160.9, 154.6, 144.2, 140.6, 135.8, 134.8, 131.6, 130.9, 130.8, 129.8, 128.0, 127.6, 127.4, 127.3, 126.4, 126.3, 125.7, 124.3, 122.3, 115.3, 106.7, 102.7, 81.3, 55.4, 48.8; IR (ATR) 3060, 3028, 2954, 2927, 2835, 1612, 1564, 1504, 1472, 1444, 1352, 1275, 1197, 1160, 1128, 1032, 910, 750, 698 cm<sup>-1</sup>; HRMS (FD<sup>+</sup>) *m/z*: [M] Calcd for C<sub>29</sub>H<sub>23</sub>BrO<sub>2</sub> 482.0881, Found: 482.0880.

### 2-benzyl-7-methoxy-2-phenyl-4-(*o*-tolyl)-2H-chromene (3la)

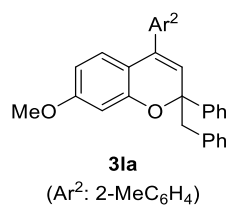

Colorless oil (28.0 mg, 0.07 mmol, 67% yield, **3la/3'la** = 98/2); R<sub>f</sub> = 0.45 (hexane/EtOAc = 10/1); <sup>1</sup>H NMR (600 MHz, CDCl<sub>3</sub>, mixture of two rotamers) δ 7.53-7.43 (m, 2H), 7.34-7.28 (m, 2H), 7.26-7.22 (m, 2H), 7.21-7.15 (m, 5H), 7.13-7.09 (m, 2H), 7.04-7.01 (m, 1H), 6.60-6.57 (m, 1H), 6.40-6.35 (m, 1H), 6.26-6.21 (m, 1H), 5.79-5.77 (m, 1H), 3.78-3.76 (m, 3H), 3.45-3.23 (m, 2H), 2.05-1.82 (m, 3H); <sup>13</sup>C NMR (151 MHz, CDCl<sub>3</sub>, mixture of two rotamers) δ 160.8, 160.7, 154.1, 154.0, 145.4, 144.8, 138.01, 137.93, 136.63, 136.61, 136.0, 135.4, 135.2, 130.9, 130.8, 129.9, 129.8, 129.6, 129.4, 128.1, 127.9, 127.8, 127.7, 127.6, 127.2, 127.1, 126.4, 126.2, 125.7, 125.6, 125.5, 123.6, 123.5, 115.8, 115.7, 106.5, 106.4, 102.3, 102.2, 81.6, 81.5, 55.35, 55.30, 49.5, 48.9, 19.6, 19.3; IR (ATR) 3059, 3027, 2958, 2931, 2835, 1613, 1567, 1504, 1455, 1443, 1357, 1314, 1285, 1196, 1160, 1125, 1032, 910, 836, 762, 734, 700 cm<sup>-1</sup>; HRMS (FD<sup>+</sup>) *m/z*: [M] Calcd for C<sub>30</sub>H<sub>26</sub>O<sub>2</sub> 418.1933, Found: 418.1933.

### 2-benzyl-6-methoxy-2,4-diphenyl-2H-chromene (3ma) and 4-benzyl-6-methoxy-2,4-diphenyl-4H-chromene (3'ma)

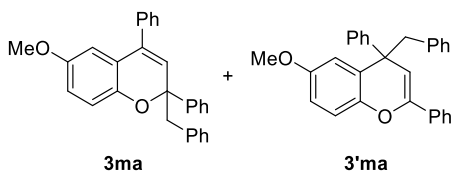

Colorless oil (racemic reaction: 28.3 mg, 0.07 mmol, 70% yield, **3ma/3'ma** = 64/36, enantioselective reaction: 14.2 mg, 0.035 mmol, 35% yield, **3ma/3'ma** = 74/26); [α]<sub>D</sub><sup>25.1</sup> = +4.5 (*c* = 0.4, CHCl<sub>3</sub>, **3ma** = 60% ee, **3'ma** = 26% ee); R<sub>f</sub> = 0.42 (hexane/EtOAc = 10/1); <sup>1</sup>H NMR (600 MHz, CDCl<sub>3</sub>) **3ma**: δ 7.58-7.53 (m, 1H), 7.43-7.41 (m, 2H), 7.41-7.30 (m, 4H), 7.27 (m, 1H), 7.21 (tt, *J* = 7.8 Hz, 1.8 Hz, 1H), 7.16-7.13 (m, 3H), 6.97-6.94 (m, 3H), 6.81-6.78 (m, 1H), 6.71 (dd, *J* = 9.0 Hz, 3.6 Hz, 1H), 6.47 (d, *J* = 3.6 Hz, 1H), 6.11 (s, 1H), 3.61 (s, 3H), 3.36-3.34 (m, 2H); **3'ma**: δ 7.58-7.53 (m, 1H), 7.40-7.30 (m, 7H), 7.29-7.25 (m, 4H), 7.25-7.22 (m, 1H), 7.09-7.01 (m, 3H), 6.69 (dd, *J* = 9.0 Hz, 3.0 Hz, 1H), 6.58 (d, *J* = 2.4 Hz, 1H), 5.27 (s, 1H), 3.71 (s, 3H), 3.64-3.61 (m, 1H), 3.38-3.36 (m, 1H); <sup>13</sup>C NMR (151 MHz, CDCl<sub>3</sub>) (for mixture of regioisomers) δ 155.2, 153.6, 149.4, 147.8, 147.2, 145.8, 144.2, 138.2, 137.6,

136.3, 135.9, 134.4, 130.9, 130.6, 128.8, 128.4, 128.3, 128.2, 127.9, 127.8, 127.6, 127.34, 127.29, 127.1, 126.4, 126.1, 125.9, 124.8, 123.3, 117.5, 116.9, 114.4, 113.6, 113.3, 111.5, 103.3, 80.6, 55.6, 48.7, 47.8, 46.2; IR (ATR) 3059, 3029, 2917, 2832, 1601, 1575, 1487, 1446, 1427, 1264, 1181, 1051, 699  $\text{cm}^{-1}$ ; HRMS (FD<sup>+</sup>) m/z: [M]<sup>+</sup> Calcd for C<sub>29</sub>H<sub>24</sub>O<sub>2</sub> 404.1776, Found: 404.1776.

### 2-benzyl-7-methyl-2,4-diphenyl-2H-chromene (3oa) and 4-benzyl-7-methyl-2,4-diphenyl-4H-chromene (3'oa)

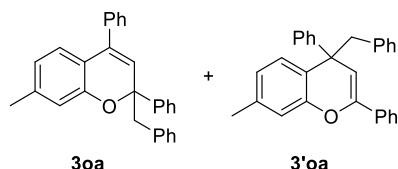

Colorless oil (26.4 mg, 0.07 mmol, 68% yield, **3oa/3'oa** = 80/20);  $R_f$  = 0.43 (hexane/EtOAc = 10/1); <sup>1</sup>H NMR (600 MHz, CDCl<sub>3</sub>) **3oa**:  $\delta$  7.55 (t,  $J$  = 7.2 Hz, 1H), 7.43 (d,  $J$  = 7.2 Hz, 2H), 7.39-7.30 (m, 5H), 7.28 (t,  $J$  = 7.8 Hz, 2H), 7.21 (t,  $J$  = 7.2 Hz, 1H), 7.16-7.13 (m, 2H), 7.00-6.97 (m, 2H), 6.85 (s, 1H), 6.78 (d,  $J$  = 7.8 Hz, 1H), 6.57 (d,  $J$  = 7.8 Hz, 1H), 5.99 (s, 1H), 3.37-3.35 (m, 2H), 2.30 (s, 3H); **3'oa**:  $\delta$  7.45-7.41 (m, 1H), 7.40-7.30 (m, 5H), 7.23 (d,  $J$  = 7.2 Hz, 2H), 7.22-7.19 (m, 1H), 7.16-7.13 (m, 2H), 7.06 (d,  $J$  = 7.2 Hz, 1H), 7.03 (d,  $J$  = 7.2 Hz, 2H), 6.95 (d,  $J$  = 7.8 Hz, 1H), 6.80 (d,  $J$  = 9.6 Hz, 1H), 6.77-6.57 (m, 1H), 6.69 (s, 1H), 5.31 (s, 1H), 3.58 (d,  $J$  = 13.2 Hz, 1H), 3.38 (d,  $J$  = 12.6 Hz, 1H), 2.28 (s, 3H); <sup>13</sup>C NMR (151 MHz, CDCl<sub>3</sub>) (for mixture of regioisomers)  $\delta$  153.2, 151.0, 149.8, 144.5, 139.7, 138.5, 137.8, 137.4, 136.1, 136.0, 134.4, 130.9, 130.6, 128.8, 128.3, 128.2, 127.93, 127.86, 127.7, 127.6, 127.3, 127.1, 126.3, 126.2, 126.0, 125.8, 125.5, 125.3, 124.7, 124.2, 121.5, 119.9, 117.5, 116.5, 104.2, 80.9, 48.9, 47.8, 21.4, 21.0, some carbon were not found due to overlapping; IR (ATR) 3059, 3029, 2921, 2856, 2350, 1575, 1541, 1495, 1445, 1410, 1375, 1331, 1306, 1267, 1219, 1148, 1075, 1028  $\text{cm}^{-1}$ ; HRMS (ESI) m/z: [M+Na]<sup>+</sup> Calcd for C<sub>29</sub>H<sub>24</sub>NaO 411.1725, Found: 411.1721.

### 2-benzyl-7-fluoro-2,4-diphenyl-2H-chromene (3pa) and 4-benzyl-7-fluoro-2,4-diphenyl-4H-chromene (3'pa)

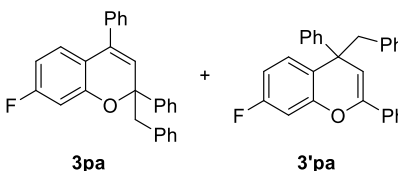

Colorless oil (20.0 mg, 0.05 mmol, 51% yield, **3pa/3'pa** = 70/30);  $R_f$  = 0.42 (hexane/EtOAc = 10/1); <sup>1</sup>H NMR (600 MHz, CDCl<sub>3</sub>) **3pa**:  $\delta$  7.43 (d,  $J$  = 8.4 Hz, 2H), 7.40-7.27 (m, 7H), 7.24 (tt,  $J$  = 7.2 Hz, 1.2 Hz, 1H), 7.17-7.14 (m, 3H), 7.00-6.97 (m, 2H), 6.83 (dd,  $J$  = 7.8 Hz, 6.6 Hz, 1H), 6.75-6.70 (m, 1H), 6.44 (dt,  $J$  = 8.4 Hz, 2.4 Hz, 1H), 5.99 (s, 1H), 3.38 (d,  $J$  = 13.8 Hz, 1H), 3.34 (d,  $J$  = 13.8 Hz, 1H); **3'pa**:  $\delta$  7.55-7.51 (m, 4H), 7.40-7.27 (m, 7H), 7.08 (tt,  $J$  = 7.2 Hz, 1.8 Hz, 1H), 7.03 (t,  $J$  = 7.8 Hz, 2H), 7.00-6.97 (m, 1H), 6.75-6.71 (m, 2H), 6.57 (dd,  $J$  = 9.6 Hz, 2.4 Hz, 1H), 5.33 (s, 1H), 3.54 (d,  $J$  = 12.6 Hz, 1H), 3.38 (d,  $J$  = 12.6 Hz, 1H); <sup>13</sup>C NMR (151 MHz, CDCl<sub>3</sub>) (for mixture of regioisomers)  $\delta$  163.2 (d,  $J$  = 247.2 Hz), 161.5 (d,  $J$  = 245.8 Hz), 154.7 (d,  $J$  = 11.6 Hz), 152.0 (d,  $J$  = 13.0 Hz), 149.33, 147.5, 144.1, 138.1, 137.3, 135.6, 135.5, 133.8, 130.9, 130.6, 130.3 (d,  $J$  = 8.8 Hz), 128.7, 128.5, 128.4, 128.3, 128.2, 128.0, 127.95, 127.93, 127.7, 127.4, 126.8 (d,  $J$  = 10.1 Hz), 126.5, 126.2, 125.7, 125.1, 124.7, 122.0 (d,  $J$  = 2.9 Hz), 118.8 (d,  $J$  = 2.9 Hz), 110.6 (d,  $J$  = 21.7 Hz), 107.6 (d,  $J$  = 21.6 Hz), 104.5 (d,  $J$  = 24.4 Hz), 104.4, 103.2 (d,  $J$  = 24.6 Hz), 81.7, 49.0, 48.0, some carbon were not found due to overlapping; <sup>19</sup>F NMR (565 MHz, CDCl<sub>3</sub>) **3pa**:  $\delta$  -111.2 to -111.2 (m); **3'pa**:  $\delta$  -114.3 to -114.5 (m); IR (ATR) 3060, 3030, 2925, 2309, 1541, 1497, 1447, 1423, 1354, 1330, 1311, 1270, 1219, 1146, 1110, 1073, 1025  $\text{cm}^{-1}$ ; HRMS (ESI) m/z: [M+Na]<sup>+</sup> Calcd for C<sub>28</sub>H<sub>21</sub>FNaO 415.1474, Found: 415.1470.

### 7-methoxy-2-(4-methylbenzyl)-2,4-diphenyl-2H-chromene (3ab)

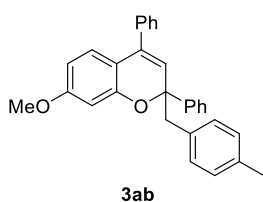

3ab

Colorless oil (35.2 mg, 0.08 mmol, 84% yield, **3ab/3'ab** = 92/8);  $R_f$  = 0.50 (hexane/EtOAc = 10/1);  $^1\text{H NMR}$  (600 MHz,  $\text{CDCl}_3$ )  $\delta$  7.44 (d,  $J$  = 7.2 Hz), 7.40-7.34 (m, 3H), 7.33-7.30 (m, 2H), 7.28 (t,  $J$  = 7.2 Hz, 2H), 7.21 (t,  $J$  = 7.8 Hz, 1H), 6.95 (d,  $J$  = 7.8 Hz, 2H), 6.86-6.81 (m, 3H), 6.59 (d,  $J$  = 2.4 Hz, 1H), 6.32 (dd,  $J$  = 8.4 Hz, 2.4 Hz, 1H), 5.92 (s, 1H), 3.79 (s, 3H), 3.36-3.33 (m, 2H), 2.27 (s, 3H);  $^{13}\text{C NMR}$  (151 MHz,  $\text{CDCl}_3$ )  $\delta$  160.7, 154.6, 144.5, 138.6, 135.9, 135.8, 132.8, 130.8, 128.8, 128.33, 128.25, 127.9, 127.7, 127.1, 126.6, 125.9, 123.7, 116.0, 106.5, 102.6, 81.3, 55.4, 48.4, 21.0; IR (ATR) 3051, 3026, 3003, 2919, 2835, 1611, 1567, 1504, 1444, 1356, 1314, 1286, 1270, 1197, 1160, 1125, 1033  $\text{cm}^{-1}$ ; HRMS (ESI)  $m/z$ :  $[\text{M}+\text{Na}]^+$   $\text{C}_{30}\text{H}_{26}\text{NaO}_2$  441.1830, Found 441.1825.

### 7-methoxy-2-(3-methylbenzyl)-2,4-diphenyl-2H-chromene (3ac)

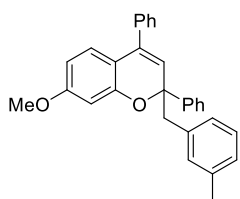

3ac

Colorless oil (36.0 mg, 0.09 mmol, 86% yield, **3ac/3'ac** = 98/2);  $R_f$  = 0.50 (hexane/EtOAc = 10/1);  $^1\text{H NMR}$  (600 MHz,  $\text{CDCl}_3$ )  $\delta$  7.46-7.43 (m, 2H), 7.39-7.34 (m, 3H), 7.33-7.27 (m, 4H), 7.22 (tt,  $J$  = 7.2 Hz, 1.2 Hz, 1H), 7.03 (t,  $J$  = 7.8 Hz, 1H), 6.96 (d,  $J$  = 7.2 Hz, 1H), 6.81 (d,  $J$  = 8.4 Hz, 1H), 6.77 (d,  $J$  = 8.4 Hz, 2H), 6.59 (d,  $J$  = 2.4 Hz, 1H), 6.32 (dd,  $J$  = 8.4 Hz, 2.4 Hz, 1H), 5.91 (s, 1H), 3.79 (s, 3H), 3.34 (d,  $J$  = 13.8 Hz, 1H), 3.31 (d,  $J$  = 13.8 Hz, 1H), 2.21 (s, 3H);  $^{13}\text{C NMR}$  (151 MHz,  $\text{CDCl}_3$ )  $\delta$  160.7, 154.7, 144.5, 138.6, 137.0, 135.9, 135.7, 131.9, 128.8, 128.3, 127.9, 127.8, 127.7, 127.4, 127.13, 127.06, 126.5, 125.9, 123.6, 115.9, 106.5, 102.5, 81.3, 55.4, 48.8, 21.3; IR (ATR) 3057, 3026, 2921, 2835, 1610, 1504, 1491, 1444, 1274, 1197, 1159, 1125, 1072, 1032, 765, 700  $\text{cm}^{-1}$ ; HRMS (ESI)  $m/z$ :  $[\text{M}+\text{Na}]^+$  Calcd for  $\text{C}_{30}\text{H}_{26}\text{NaO}_2$  441.1830, Found 441.1825.

### 7-methoxy-2-(2-methylbenzyl)-2,4-diphenyl-2H-chromene (3ad)

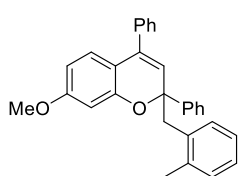

3ad

Colorless oil (36.8 mg, 0.09 mmol, 88% yield, **3ad/3'ad** = 95/5);  $R_f$  = 0.52 (hexane/EtOAc = 10/1);  $^1\text{H NMR}$  (600 MHz,  $\text{CDCl}_3$ )  $\delta$  7.42 (d,  $J$  = 7.2 Hz, 2H), 7.40-7.35 (m, 3H), 7.34-7.31 (m, 2H), 7.27 (t,  $J$  = 7.2 Hz, 2H), 7.22 (t,  $J$  = 7.2 Hz, 1H), 7.10-7.00 (m, 4H), 6.79 (d,  $J$  = 9.0 Hz, 1H), 6.56 (d,  $J$  = 2.4 Hz, 1H), 6.29 (dd,  $J$  = 8.4 Hz, 2.4 Hz, 1H), 5.97 (s, 1H), 3.78 (s, 3H), 3.42 (d,  $J$  = 13.8 Hz, 1H), 3.36 (d,  $J$  = 13.8 Hz, 1H), 2.07 (s, 3H);  $^{13}\text{C NMR}$  (151 MHz,  $\text{CDCl}_3$ )  $\delta$  160.7, 154.6, 144.9, 138.6, 137.9, 135.9, 134.3, 131.8, 130.0, 128.7, 128.3, 127.9, 127.7, 127.2, 126.5, 125.8, 125.0, 123.6, 115.7, 106.4, 102.4, 81.7, 55.4, 45.7, 20.0; IR (ATR) 3058, 3022, 2956, 2931, 2864, 2835, 1611, 1567, 1504, 1491, 1462, 1444, 1356, 1313, 1274, 1197, 1159, 1124, 1071, 1031, 992, 842, 808, 757, 719, 699  $\text{cm}^{-1}$ ; HRMS (ESI)  $m/z$ :  $[\text{M}+\text{Na}]^+$  Calcd for  $\text{C}_{30}\text{H}_{26}\text{NaO}_2$  441.1830, Found 441.1825.

### 2-(3,5-dimethylbenzyl)-7-methoxy-2,4-diphenyl-2H-chromene (3ae)

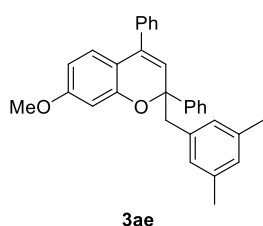

3ae

Colorless oil (30.3 mg, 0.07 mmol, 70% yield, **3ae/3'ae** = 97/3);  $R_f$  = 0.51 (hexane/EtOAc = 10/1);  $^1\text{H NMR}$  (600 MHz,  $\text{CDCl}_3$ )  $\delta$  7.46-7.43 (m, 2H), 7.40-7.34 (m, 3H), 7.33-7.27 (m, 4H), 7.22 (tt,  $J$  = 7.2 Hz, 1.8 Hz, 1H), 6.81 (d,  $J$  = 8.4 Hz, 1H), 6.78 (m, 1H), 6.58 (d,  $J$  = 2.4 Hz, 1H), 6.55 (m, 2H), 6.31 (dd,  $J$  = 9.0 Hz, 2.4 Hz, 1H), 5.90 (s, 1H), 3.79 (s, 3H), 3.30 (d,  $J$  = 13.2 Hz, 1H), 3.26 (d,  $J$  = 13.2 Hz, 1H), 2.17 (s, 6H);  $^{13}\text{C NMR}$  (151 MHz,  $\text{CDCl}_3$ )  $\delta$  160.6,

154.7, 144.5, 138.6, 136.8, 135.8, 135.5, 128.9, 128.8, 128.2, 127.9, 127.8, 127.7, 127.1, 126.5, 125.9, 123.6, 116.0, 106.5, 102.5, 81.3, 55.3, 48.7, 21.2; IR (ATR) 3056, 3024, 2916, 2835, 1567, 1504, 1491, 1463, 1443, 1355, 1314, 1284, 1269, 1196, 1125, 1073, 1032, 848, 738, 718, 699  $\text{cm}^{-1}$ ; HRMS (ESI)  $m/z$ :  $[M+Na]^+$  Calcd for  $\text{C}_{31}\text{H}_{28}\text{NaO}_2$  455.1987, Found: 455.1981.

**7-methoxy-2,4-diphenyl-2-(1-phenylethyl)-2H-chromene (3af) and 7-methoxy-2,4-diphenyl-4-(1-phenylethyl)-4H-chromene (3'af)**

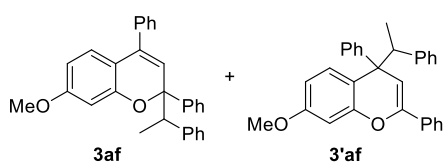

Colorless oil (34.7 mg, 0.08 mmol, 83% yield, **3af/3'af** = 86/14, **3af** : 51/49 dr, **3'af**: 51/49 dr);  $R_f$  = 0.45 (hexane/EtOAc = 10/1);  $^1\text{H}$  NMR (600 MHz,  $\text{CDCl}_3$ )

**3af** (for mixture of diastereomers)  $\delta$  7.40-7.00 (m, 30H), 6.83 (d,  $J$  = 8.4 Hz, 1H), 6.71 (d,  $J$  = 8.4 Hz, 1H), 6.65-6.63 (m, 1H), 6.62-6.60 (m, 1H), 6.31 (dt,  $J$  = 9.0 Hz, 2.4 Hz, 1H), 6.26 (dt,  $J$  = 8.4 Hz, 2.4 Hz, 1H), 5.98 (s, 1H), 5.87 (s, 1H), 3.79 (s, 3H), 3.78 (s, 3H), 3.39-3.34 (m, 2H), 1.43 (d,  $J$  = 7.2 Hz, 3H), 1.41 (d,  $J$  = 7.2 Hz, 3H); **3'af** (for mixture of diastereomers)  $\delta$  7.70 (d,  $J$  = 7.2 Hz, 2H), 7.66 (d,  $J$  = 7.8 Hz, 2H), 7.63 (d,  $J$  = 7.8 Hz, 2H), 7.48 (d,  $J$  = 7.2 Hz, 2H), 7.45-7.03 (m, 19H), 6.97 (t,  $J$  = 7.8 Hz, 2H), 6.92 (d,  $J$  = 8.4 Hz, 1H), 6.89 (d,  $J$  = 7.2 Hz, 2H), 6.67 (d,  $J$  = 8.4 Hz, 1H), 6.58 (t,  $J$  = 2.4 Hz, 1H), 6.47 (dt,  $J$  = 8.4 Hz, 2.4 Hz, 1H), 6.18 (t,  $J$  = 2.4 Hz, 1H), 5.69 (s, 1H), 5.43 (s, 1H), 3.80 (s, 3H), 3.65 (s, 3H), 2.96-2.91 (m, 1H), 2.82-2.77 (m, 1H), 1.30 (d,  $J$  = 7.2 Hz, 3H), 1.28 (d,  $J$  = 6.6 Hz, 3H);  $^{13}\text{C}$  NMR (151 MHz,  $\text{CDCl}_3$ ) (for mixture of regioisomers and their diastereomers)  $\delta$  160.74, 160.68, 158.9, 158.4, 154.8, 154.7, 152.7, 150.7, 149.3, 147.8, 147.6, 147.5, 145.8, 144.8, 143.7, 142.7, 142.6, 141.8, 141.5, 138.7, 135.8, 135.4, 134.5, 134.2, 129.8, 129.7, 129.5, 129.3, 128.74, 128.72, 128.4, 128.3, 128.24, 128.18, 128.0, 127.9, 127.80, 127.76, 127.68, 127.65, 127.59, 127.52, 127.33, 127.30, 126.93, 126.89, 126.7, 126.5, 126.4, 126.3, 126.14, 126.05, 125.99, 125.93, 125.89, 125.7, 124.9, 124.7, 123.9, 123.0, 119.4, 117.3, 115.7, 115.6, 110.2, 106.4, 106.1, 103.6, 102.5, 102.3, 100.8, 100.3, 100.1, 83.7, 83.3, 55.4, 55.3, 51.2, 50.6, 48.7, 48.5, 48.4, 48.0, 47.2, 46.4, 17.9, 17.8, 16.3, 15.7, some carbon could not be assigned due to presence of regioisomers and their diastereomers; IR (ATR) 3082, 3058, 3027, 2968, 2934, 2907, 2876, 2830, 2249, 1568, 1541, 1492, 1374, 1322, 1275, 1218, 1197, 1160, 1072, 1032, 1020, 987  $\text{cm}^{-1}$ ; HRMS (ESI)  $m/z$ :  $[M+Na]^+$  Calcd for  $\text{C}_{30}\text{H}_{26}\text{NaO}_2$  441.1830, Found: 441.1825.

**7-methoxy-2,4-diphenyl-2-(2-phenylpropan-2-yl)-2H-chromene (3ag)**

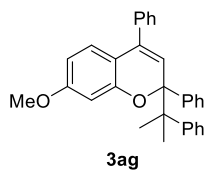

Colorless oil (31.6 mg, 0.07 mmol, 73% yield, **3ag/3'ag** = 91/9);  $R_f$  = 0.42 (hexane/EtOAc = 10/1);  $^1\text{H}$  NMR (600 MHz,  $\text{CDCl}_3$ )  $\delta$  7.39-7.33 (m, 4H), 7.28 (d,  $J$  = 8.4 Hz, 2H), 7.19-7.15 (m, 3H), 7.13-7.09 (m, 5H), 7.06 (d,  $J$  = 6.6 Hz, 2H), 6.72 (d,  $J$  = 9.0 Hz, 1H), 6.56 (t,  $J$  = 3.0 Hz, 1H), 6.24 (dt,  $J$  = 8.4 Hz, 2.4 Hz, 1H), 6.12 (s, 1H), 3.77 (s, 3H), 1.56 (s, 3H), 1.52 (s, 3H);  $^{13}\text{C}$  NMR (151 MHz,  $\text{CDCl}_3$ )  $\delta$

160.6, 154.7, 144.4, 142.2, 138.9, 135.8, 129.1, 128.8, 128.3, 128.1, 127.6, 126.8, 126.4, 126.1, 122.9, 115.8, 106.1, 102.5, 85.1, 55.3, 46.3, 24.8, 24.4; IR (ATR) 3056, 3027, 2959, 2933, 2835, 2370, 1782, 1569, 1504, 1463, 1443, 1386, 1357, 1307, 1274, 1197, 1160, 1123, 1033, 1014, 970  $\text{cm}^{-1}$ ; HRMS (ESI)  $m/z$ :  $[M+Na]^+$  Calcd for  $\text{C}_{31}\text{H}_{28}\text{NaO}_2$  455.1987, Found: 455.1982.



### 2-(4-isopropylbenzyl)-7-methoxy-2,4-diphenyl-2H-chromene (3ah)

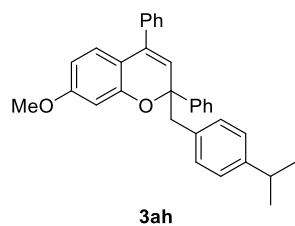

Colorless oil (39.7 mg, 0.09 mmol, 89% yield, **3ah/3'ah** = 92/8);  $R_f$  = 0.40 (hexane/EtOAc = 10/1);  $^1\text{H NMR}$  (600 MHz,  $\text{CDCl}_3$ )  $\delta$  7.47-7.44 (m, 2H), 7.39-7.33 (m, 3H), 7.32-7.27 (m, 4H), 7.22 (tt,  $J$  = 7.8 Hz, 1.2 Hz, 1H), 7.00 (d,  $J$  = 7.8 Hz, 2H), 6.91 (d,  $J$  = 8.4 Hz, 2H), 6.80 (d,  $J$  = 8.4 Hz, 1H), 6.59 (d,  $J$  = 2.4 Hz, 1H), 6.31 (dd,  $J$  = 8.4 Hz, 2.4 Hz, 1H), 5.91 (s, 1H), 3.79 (s, 3H), 3.35 (d,  $J$  = 13.8 Hz, 1H), 3.31 (d,  $J$  = 13.8 Hz, 1H), 2.82 (sep, 7.2 Hz, 1H), 1.19 (d,  $J$  = 7.2 Hz, 6H);  $^{13}\text{C NMR}$  (151 MHz,  $\text{CDCl}_3$ )  $\delta$  160.7, 154.7, 146.8, 144.6, 138.6, 135.9, 133.2, 130.8, 128.8, 128.2, 127.9, 127.7, 127.1, 126.5, 125.9, 125.7, 123.7, 115.9, 106.4, 102.6, 81.4, 55.4, 48.5, 33.6, 23.98, 23.96; IR (ATR) 3079, 3056, 2959, 2929, 1611, 1567, 1505, 1462, 1444, 1315, 1275, 1197, 1160, 1125, 1033, 910, 749, 700  $\text{cm}^{-1}$ ; HRMS (ESI)  $m/z$ :  $[\text{M}+\text{Na}]^+$  Calcd for  $\text{C}_{32}\text{H}_{30}\text{NaO}_2$  469.2143, Found: 469.2138.

### 2-(4-bromobenzyl)-7-methoxy-2,4-diphenyl-2H-chromene (3ai)

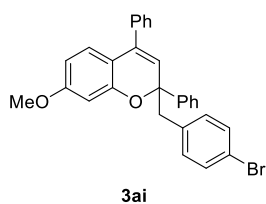

Colorless oil (10.2 mg, 0.02 mmol, 21% yield, **3ai/3'ai** = 95/5);  $R_f$  = 0.40 (hexane/EtOAc = 10/1);  $^1\text{H NMR}$  (600 MHz,  $\text{CDCl}_3$ )  $\delta$  7.42 (d,  $J$  = 7.2 Hz, 2H), 7.40-7.33 (m, 3H), 7.32 (d,  $J$  = 1.2 Hz, 1H), 7.32-7.30 (m, 1H), 7.29 (s, 1H), 7.28-7.27 (m, 1H), 7.27-7.25 (m, 1H), 7.22 (tt,  $J$  = 7.2 Hz, 1.2 Hz, 1H), 6.85-6.82 (m, 3H), 6.57 (d,  $J$  = 2.4 Hz, 1H), 6.34 (dd,  $J$  = 9.0 Hz, 2.4 Hz, 1H), 5.88 (s, 1H), 3.79 (s, 3H), 3.32 (d,  $J$  = 13.2 Hz, 1H), 3.28 (d,  $J$  = 13.8 Hz, 1H);  $^{13}\text{C NMR}$  (151 MHz,  $\text{CDCl}_3$ )  $\delta$  160.8, 154.4, 144.0, 138.4, 136.2, 134.9, 132.5, 130.7, 128.7, 128.3, 128.0, 127.8, 127.3, 126.7, 125.7, 123.3, 120.5, 115.8, 106.6, 102.6, 81.0, 55.4, 48.1; IR (ATR) 3058, 3027, 2933, 2835, 1611, 1504, 1488, 1444, 1274, 1197, 1160, 1125, 1071, 1032, 1012, 759, 699  $\text{cm}^{-1}$ ; HRMS (ESI)  $m/z$ :  $[\text{M}+\text{Na}]^+$  Calcd for  $\text{C}_{29}\text{H}_{23}\text{BrNaO}_2$  505.0779, Found: 505.0773.

### 2-(4-fluorobenzyl)-7-methoxy-2,4-diphenyl-2H-chromene (3aj)

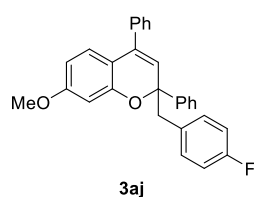

Colorless oil (34.6 mg, 0.08 mmol, 82% yield, **3aj/3'aj** = 96/4);  $R_f$  = 0.40 (hexane/EtOAc = 10/1);  $^1\text{H NMR}$  (600 MHz,  $\text{CDCl}_3$ )  $\delta$  7.42 (dd,  $J$  = 8.4 Hz, 1.2 Hz, 2H), 7.40-7.33 (m, 3H), 7.32-7.27 (m, 4H), 7.22 (tt,  $J$  = 7.2 Hz, 1.8 Hz, 1H), 6.95-6.91 (m, 2H), 6.85-6.81 (m, 3H), 6.58 (d,  $J$  = 3.0 Hz, 1H), 6.32 (dd,  $J$  = 9.0 Hz, 2.4 Hz, 1H), 5.89 (s, 1H), 3.80 (s, 3H), 3.33 (d,  $J$  = 13.8 Hz, 1H), 3.31 (d,  $J$  = 13.8 Hz, 1H);  $^{13}\text{C NMR}$  (151 MHz,  $\text{CDCl}_3$ )  $\delta$  161.7 (d,  $J$  = 244.3 Hz), 160.8, 154.5, 144.2, 138.4, 136.1, 132.3 (d,  $J$  = 7.2 Hz), 131.6 (d,  $J$  = 2.9 Hz), 128.7, 128.3, 128.0, 127.8, 127.2, 126.7, 125.7, 123.4, 115.8, 114.4 (21.7 Hz), 106.5, 102.6, 81.1, 55.4, 48.0;  $^{19}\text{F NMR}$  (565 MHz,  $\text{CDCl}_3$ )  $\delta$  -116.7 to -116.8; IR (ATR) 3057, 3027, 3002, 2929, 2854, 1724, 1610, 1567, 1508, 1444, 1356, 1313, 1286, 1271, 1257, 1221, 1197, 1159, 1032, 835, 700  $\text{cm}^{-1}$ ; HRMS (ESI)  $m/z$ :  $[\text{M}+\text{Na}]^+$  Calcd for  $\text{C}_{29}\text{H}_{23}\text{FNaO}_2$  445.1580, Found: 445.1574.

## 5. Enantioselective radical addition reaction using chiral phosphoric acid catalyts

Procedure for the enantioselective radical addition reaction between chromenol **1m** and toluene **2a** catalyzed by chiral phosphoric acid (*S*)-**4**.

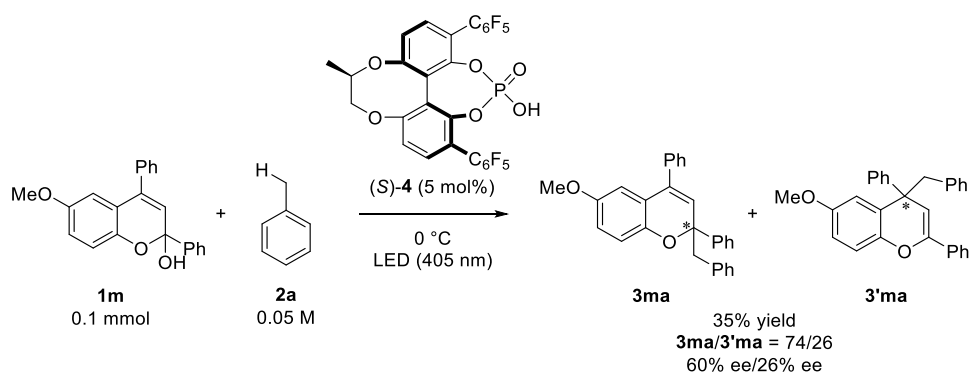

To a mixture of **1m** (0.1 mmol) and (*S*)-**4** (5 mol%) was added toluene (1.0 ml) under argon atmosphere. The reaction mixture was stirred -75 °C for 12 h under LED irradiation (405 nm). The reaction mixture was purified by flash column chromatography (Hexane/ EtOAc = 10/1) to give a mixture of **3ma** and **3'ma** (14.2 mg, 35% yield, **3ma/3'ma** = 74/26, ee of **3ma** = 60%, ee of **3'ma** = 26%). The enantiomeric excess was determined by chiral stationary phase HPLC analysis (CHIRALPAK AD-3 (hexane:*i*PrOH = 99/1, 1.0 mL/min, 30 °C, 254 nm) 14.7 min (minor of **3ma**), 17.4 min (major of **3ma**), 18.8 min (minor of **3'ma**), 21.5 min (major of **3'ma**)).

## 6. Additional screening

### 6-1. The reaction of benzopyrylium cation salts $1^+a^+X^-$

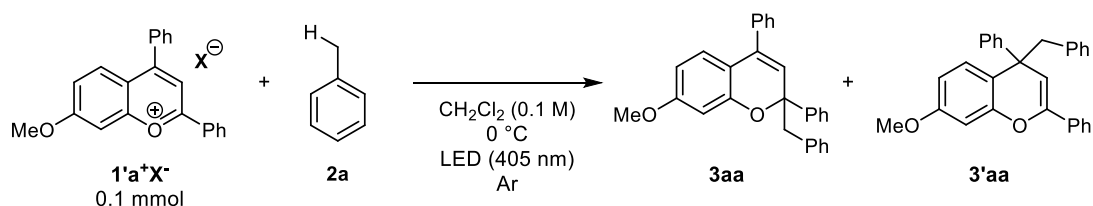

| entry | $1^+a^+X^-$ | time (h) | yield (%) <sup>a</sup> | <b>3aa/3'aa</b> |
|-------|-------------|----------|------------------------|-----------------|
| 1     | $X = BF_4$  | 3        | <1                     | -               |
| 2     | $X = ClO_4$ | 3        | <1                     | -               |
| 3     | $X = OTf$   | 3        | 3                      | 89/11           |

<sup>a</sup> NMR yield.

### 6-2. Screening of chiral phosphoric acids for enantioselective reaction

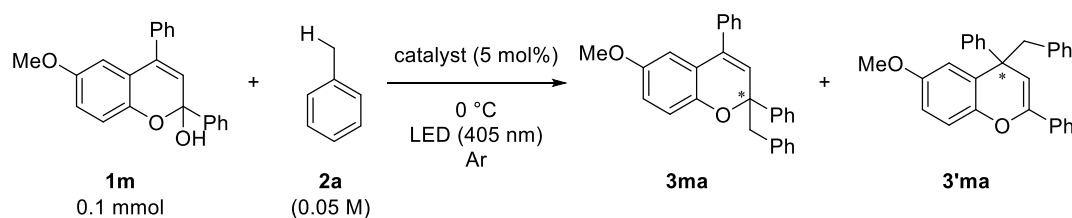

| entry | catalyst                | time (h) | yield(%) <sup>a</sup> | <b>3ma/3'ma</b> | ee (%) of <b>3ma/3'ma</b> |
|-------|-------------------------|----------|-----------------------|-----------------|---------------------------|
| 1     | ( <i>R</i> )- <b>5a</b> | 6        | <1                    | -               | -                         |
| 2     | ( <i>R</i> )- <b>5b</b> | 6        | 44                    | 86/14           | -33/-47                   |
| 3     | ( <i>R</i> )- <b>6</b>  | 2.5      | 67                    | 43/57           | -21/-8                    |
| 4     | ( <i>R</i> )- <b>7</b>  | 1.5      | 80                    | 66/34           | -15/-10                   |
| 5     | ( <i>S</i> )- <b>4</b>  | 1        | 72                    | 67/33           | 31/25                     |

<sup>a</sup> NMR yield

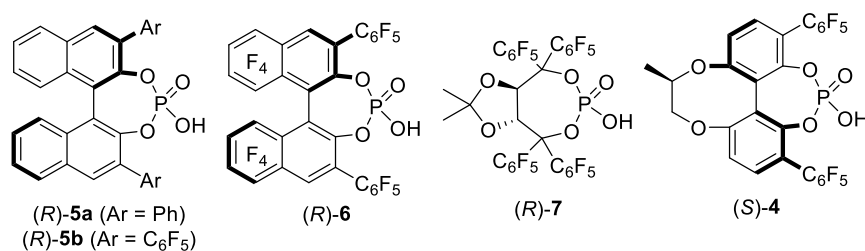

In the case of using (*R*)-**5** (especially in using (*R*)-**5a**), the degradation of the catalysts was observed probably due to the oxidation of catalysts. In contrast, no degradation of the catalysts was observed when (*R*)-**6**, (*R*)-**7**, and (*S*)-**4** were used in this reaction conditions.

### 6-3. Investigation of reaction conditions

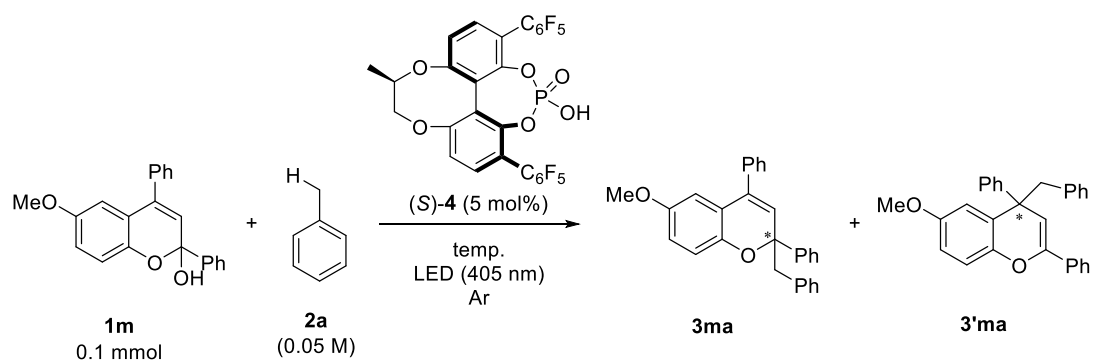

| entry          | temp. (°C) | time (h) | yield (%) | 3ma/3'ma | ee (%) of 3ma/3'ma |
|----------------|------------|----------|-----------|----------|--------------------|
| 1              | 0          | 1        | 72        | 67/33    | 31/25              |
| 2 <sup>a</sup> | -20        | 2        | 68        | 68/32    | -40/-17            |
| 3              | -40        | 6        | 57        | 74/26    | 55/25              |
| 4              | -50        | 9        | 56        | 75/25    | 54/25              |
| 5              | -75        | 12       | 35        | 74/26    | 60/26              |

<sup>a</sup> (R)-4 was used.

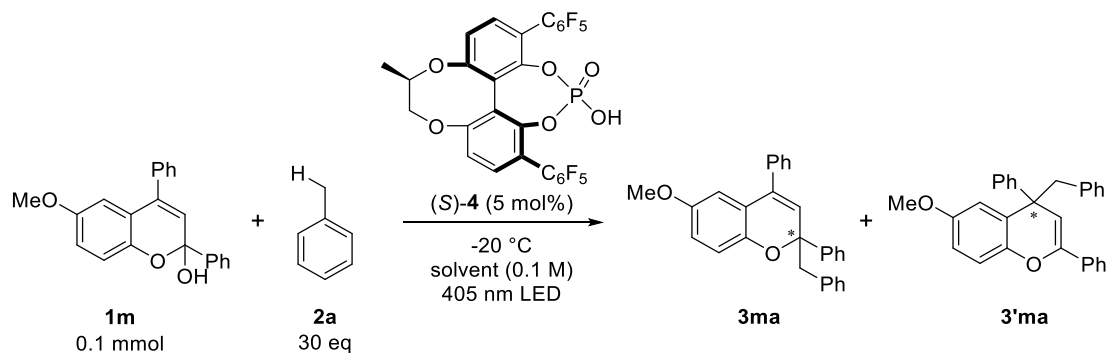

| entry | solvent                         | time (h) | yield (%) | 3ma/3'ma | ee (%) of 3ma/3'ma |
|-------|---------------------------------|----------|-----------|----------|--------------------|
| 1     | CH <sub>2</sub> Cl <sub>2</sub> | 2        | 37        | 62/38    | 15/6               |
| 2     | THF                             | 3        | 62        | 68/32    | 36/22              |
| 3     | MTBE                            | 9        | 23        | 70/30    | 32/21              |
| 4     | MeCN                            | 7        | 10        | 56/44    | 17/11              |

### 6-4. Enantioselective reaction of 1a

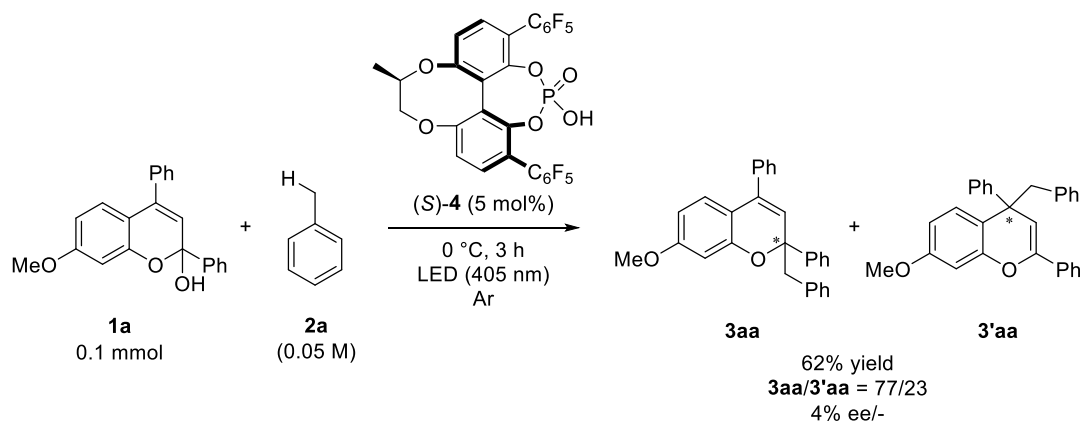

## 7. UV-Vis absorption spectroscopy

To a solution of **1a** or **1i** in  $\text{CH}_2\text{Cl}_2$  ( $1.0 \times 10^{-5}$  M) was added 1.0 equiv of TFA, and then a UV/Vis spectra was recorded (Figure S1). The spectra data indicates that the treatment of TFA enables the formation of the benzopyrylium cation intermediates. As shown in Figure S1c, the introduction of the methoxy group leads to a redshift in the absorption spectra of the generated benzopyrylium cation intermediate.

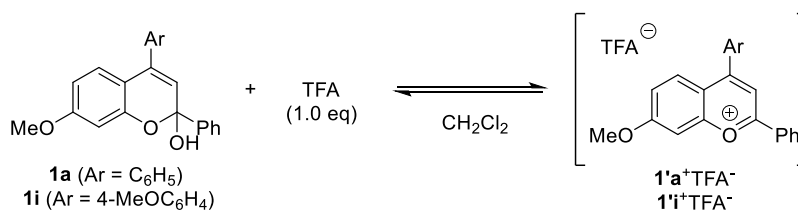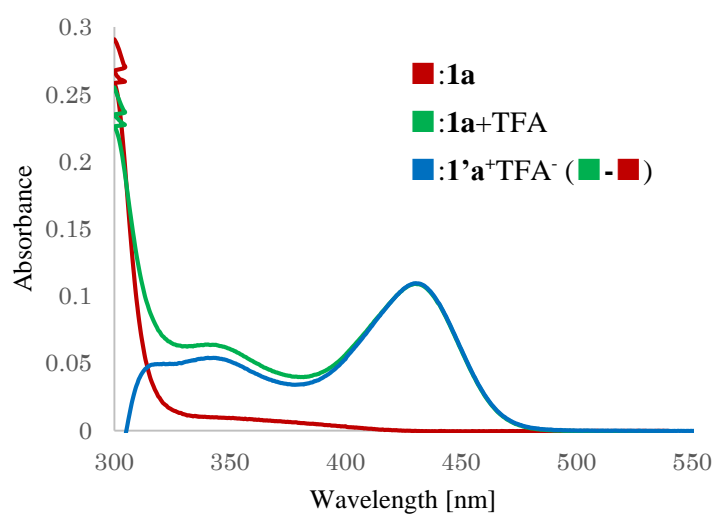

**Figure S1a.** UV/Vis spectroscopy analysis of **1'a<sup>+</sup>TFA<sup>-</sup>**

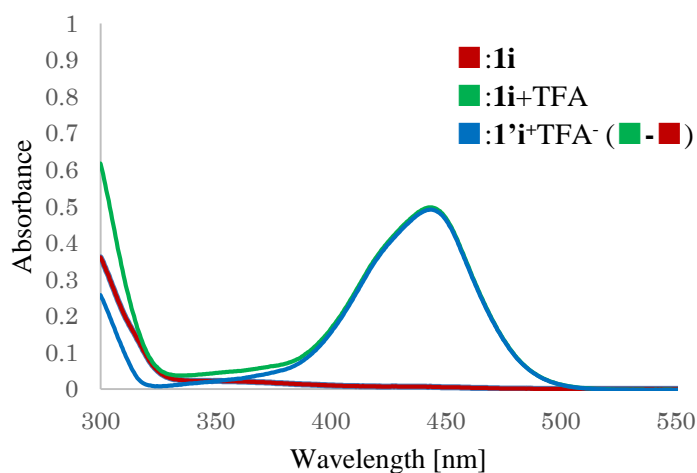

**Figure S1b.** UV/Vis spectroscopy analysis of **1'i<sup>+</sup>TFA<sup>-</sup>**

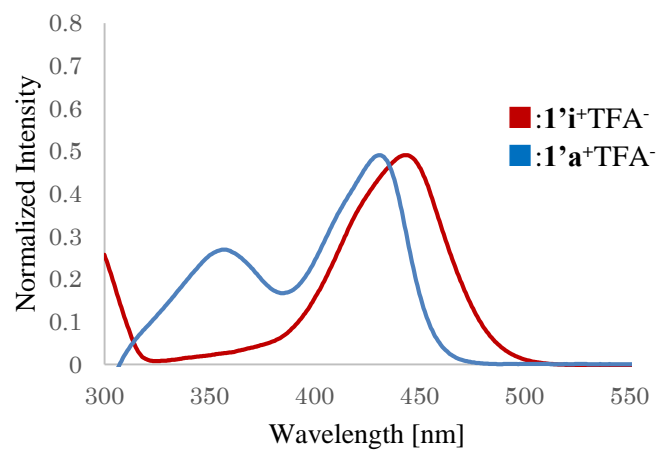

**Figure S1c.** UV/Vis spectroscopy analysis of  $1'a^+TFA^-$  and  $1'i^+TFA^-$

## 8. Stern-Volmer luminescence quenching experiments

Emission intensities were recorded on a HITACHI F-4500. The solutions were excited at 360 nm and the luminescence was measured at 479 nm. Stern-Volmer luminescence quenching experiments were run with prepared mixture of  $1^+a^+BF_4^-$  ( $1.0 \times 10^{-6}$  M) and toluene (indicated concentration) in  $CH_2Cl_2$  solutions (Figure S2). The data shows that toluene is competent at quenching the excited state of the  $1^+a^+BF_4^-$ .

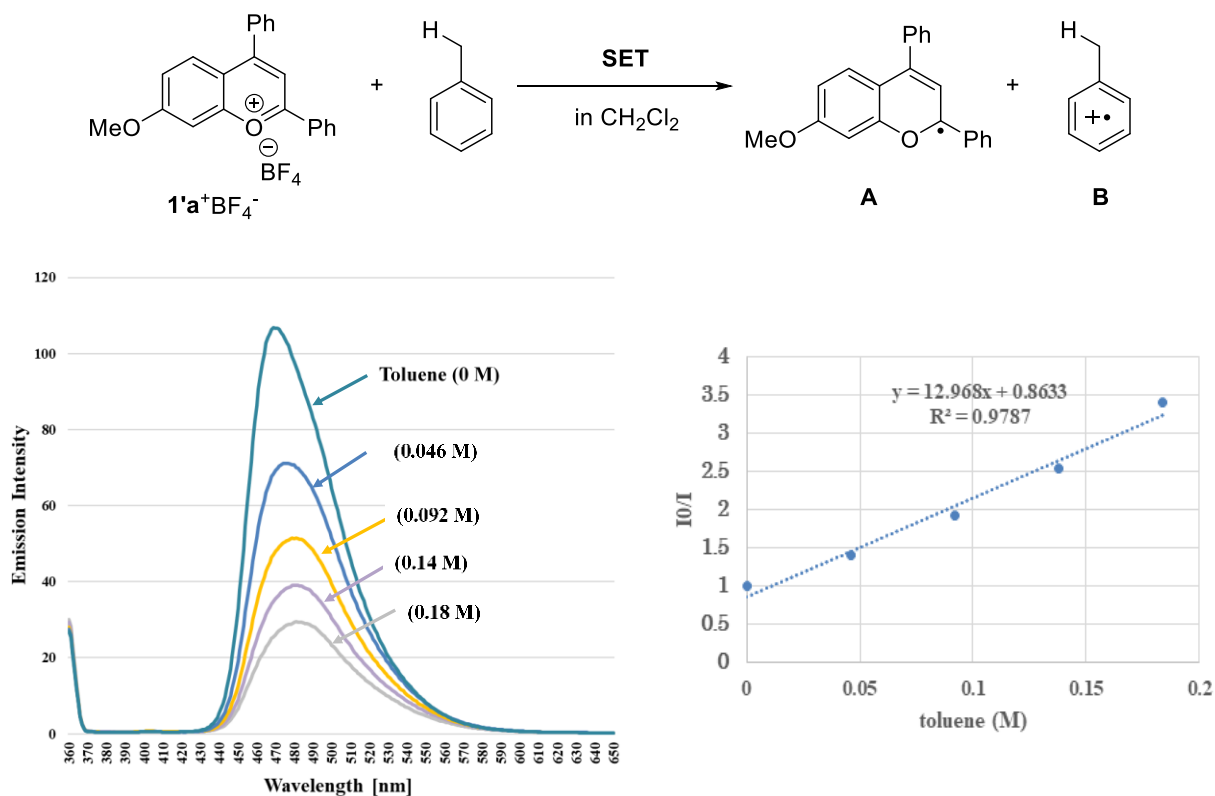

Figure S2. (a) Fluorescence spectra of  $1^+a^+BF_4^-$  in DCM with increasing amount of toluene. (b) The Stern-Volmer plots.

## 9. Light ON/OFF Experiment

Light On/Off experiment was conducted to confirm if the reaction proceeds in a chain process or not. As a result, the present reaction proceeded only in the presence of light irradiation. This result indicates that the present reaction does not proceed in a chain process.

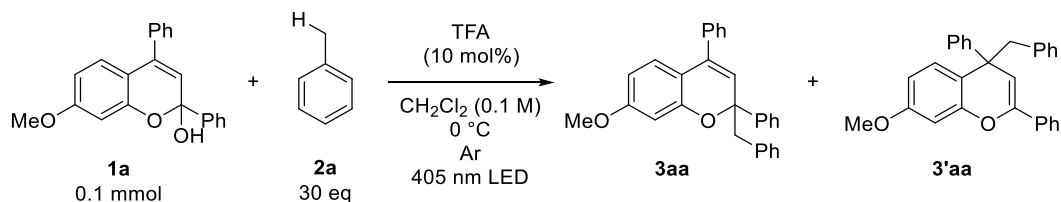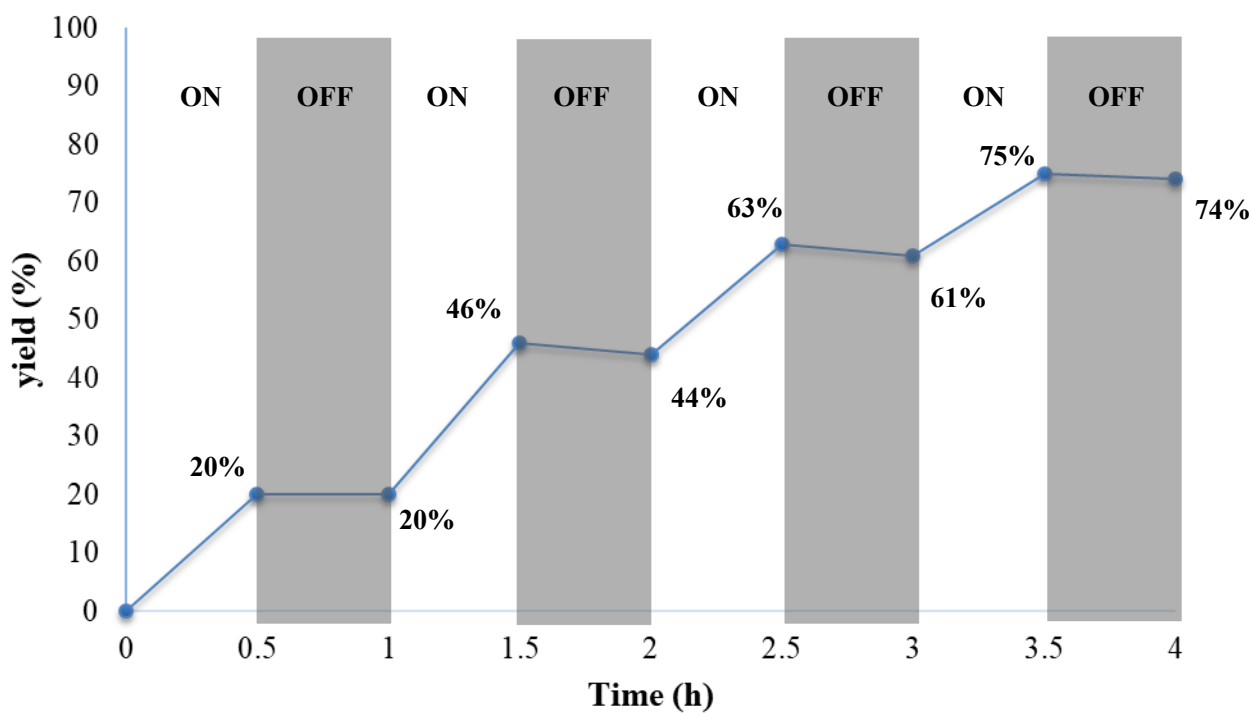



## 10. Theoretical Studies

### 10-1. Energy profile in the carbon-carbon bond forming step

DFT calculation was conducted to determine the actual reaction pathway in the carbon-carbon bond formation step. All calculations were performed with the Gaussian 16 package (Revision B.01). Geometries were optimized and characterized using frequency calculations at the UM06-2X/6-311+G(d,p) level. Gibbs free energies in the solution phase were calculated using single-point energy calculations at the same level according to the SMD solvation model (dichloromethane:  $\epsilon = 8.93$ ) for the optimized structures.

#### (a) Radical coupling pathway

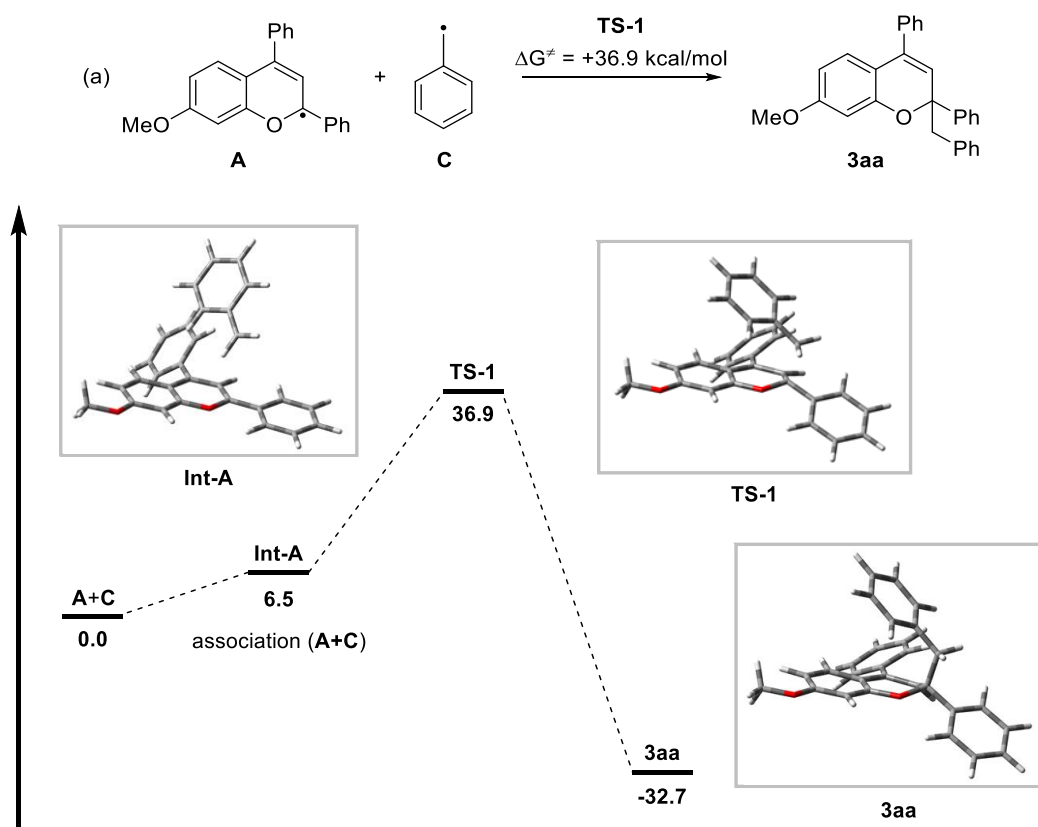

(b) Radical addition pathway

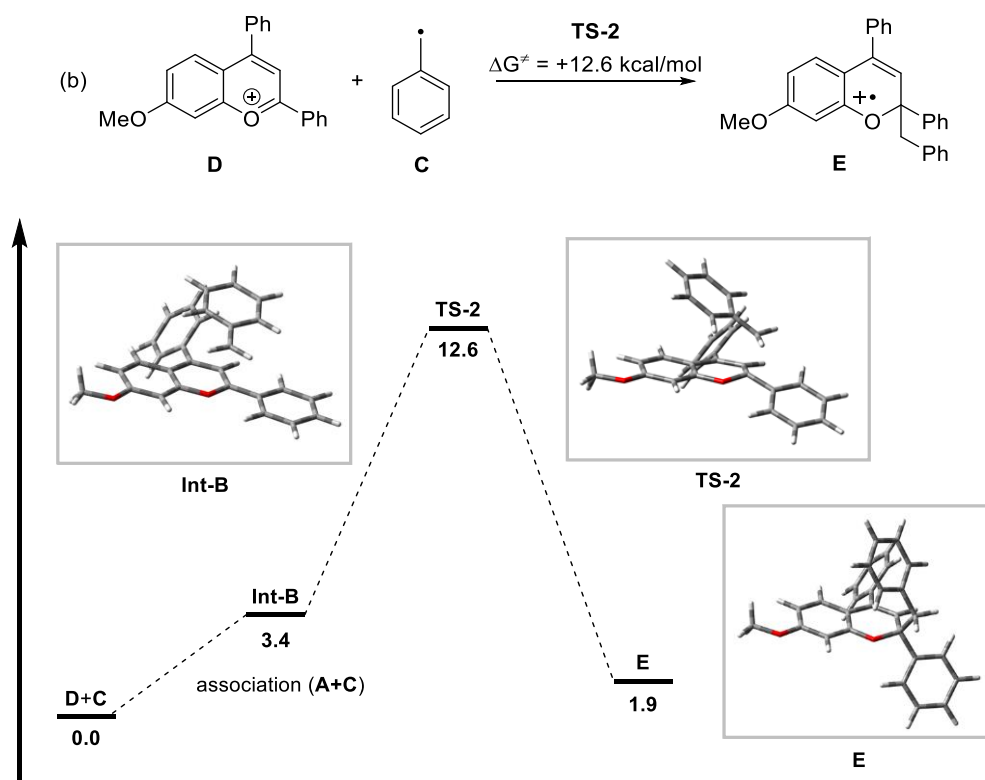

(c) Electron transfer process

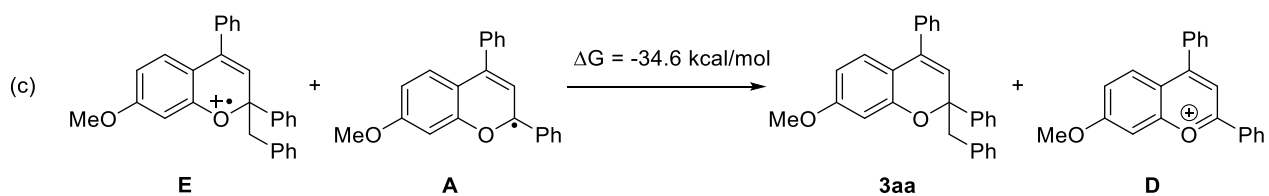

## Cartesian coordinates

### Benzopyrylium radical (A)

UM062X/6-311g(d,p)  
 E(UM062X) = -998.835704 hartree  
 Zero-point Energy Correction = 0.329416 hartree  
 Thermal Correction to Energy = 0.348528 hartree  
 Thermal correction to Enthalpy = 0.349472 hartree  
 Thermal correction to Gibbs Free Energy = 0.279545 hartree  
 Sum of electronic and Zero-point Energies = -998.506288 hartree  
 Sum of electronic and thermal Energies = -998.487176 hartree  
 Sum of electronic and thermal Enthalpies = -998.486231 hartree  
 Sum of electronic and thermal Free Energies = -998.556159 hartree  
 SMD(CH<sub>2</sub>Cl<sub>2</sub>)/UM062X/6-311g(d,p)  
 E(UM062X) = -998.86523 hartree  
 Gibbs Free Energy in CH<sub>2</sub>Cl<sub>2</sub> = -998.58568 hartree  
 The number of Imaginary frequencies = 0

| Center Number | Atomic Number | Atomic Type | Coordinates (Angstroms) |           |           |
|---------------|---------------|-------------|-------------------------|-----------|-----------|
|               |               |             | X                       | Y         | Z         |
| 1             | 6             | 0           | 2.654434                | 4.718728  | 0.110435  |
| 2             | 6             | 0           | 3.015223                | 3.672177  | 0.954807  |
| 3             | 6             | 0           | 1.603822                | 4.544852  | -0.784936 |
| 4             | 6             | 0           | 2.336537                | 2.461839  | 0.901562  |
| 5             | 1             | 0           | 3.822135                | 3.803169  | 1.666375  |
| 6             | 6             | 0           | 0.923033                | 3.334918  | -0.838758 |
| 7             | 1             | 0           | 1.318894                | 5.351021  | -1.450821 |
| 8             | 6             | 0           | 1.277419                | 2.271514  | 0.002296  |
| 9             | 1             | 0           | 2.603220                | 1.662519  | 1.583763  |
| 10            | 1             | 0           | 0.120230                | 3.197203  | -1.554828 |
| 11            | 6             | 0           | 0.517524                | 1.011606  | -0.031377 |
| 12            | 6             | 0           | 1.154550                | -0.288651 | -0.036621 |
| 13            | 6             | 0           | -0.875748               | 1.035567  | -0.048057 |
| 14            | 6             | 0           | 2.530158                | -0.518880 | -0.159619 |
| 15            | 6             | 0           | 0.329822                | -1.432601 | 0.023971  |
| 16            | 6             | 0           | -1.640306               | -0.109684 | 0.003379  |
| 17            | 6             | 0           | 3.069151                | -1.799521 | -0.173391 |
| 18            | 1             | 0           | 3.195509                | 0.328499  | -0.263900 |
| 19            | 6             | 0           | 0.841242                | -2.714336 | 0.017583  |
| 20            | 6             | 0           | 2.220413                | -2.903793 | -0.072446 |
| 21            | 1             | 0           | 0.177953                | -3.567545 | 0.070273  |
| 22            | 1             | 0           | 3.186289                | 5.661565  | 0.151881  |
| 23            | 1             | 0           | -1.382265               | 1.990972  | -0.044868 |
| 24            | 6             | 0           | -3.092517               | -0.191039 | 0.028228  |
| 25            | 6             | 0           | -3.729240               | -1.431403 | 0.197887  |
| 26            | 6             | 0           | -3.895455               | 0.954023  | -0.117205 |
| 27            | 6             | 0           | -5.114656               | -1.517512 | 0.227913  |
| 28            | 1             | 0           | -3.128477               | -2.323727 | 0.308606  |
| 29            | 6             | 0           | -5.276750               | 0.858994  | -0.084884 |
| 30            | 1             | 0           | -3.442021               | 1.926072  | -0.263867 |
| 31            | 6             | 0           | -5.897929               | -0.376942 | 0.088817  |
| 32            | 1             | 0           | -5.584740               | -2.484707 | 0.361921  |
| 33            | 1             | 0           | -5.874940               | 1.755197  | -0.199624 |
| 34            | 1             | 0           | -6.978484               | -0.447097 | 0.112602  |
| 35            | 8             | 0           | -1.030247               | -1.333587 | 0.081556  |
| 36            | 1             | 0           | 4.138656                | -1.921560 | -0.271231 |
| 37            | 8             | 0           | 2.636171                | -4.193207 | -0.066806 |
| 38            | 6             | 0           | 4.024133                | -4.438702 | -0.167460 |
| 39            | 1             | 0           | 4.565348                | -3.990870 | 0.671425  |
| 40            | 1             | 0           | 4.140619                | -5.519420 | -0.138666 |
| 41            | 1             | 0           | 4.425514                | -4.053873 | -1.109794 |

### Benzyl radical (C)

UM062X/6-311g(d,p)  
 E(UM062X) = -270.852205 hartree  
 Zero-point Energy Correction = 0.115117 hartree  
 Thermal Correction to Energy = 0.120795 hartree  
 Thermal correction to Enthalpy = 0.121739 hartree  
 Thermal correction to Gibbs Free Energy = 0.085448 hartree  
 Sum of electronic and Zero-point Energies = -270.737088 hartree  
 Sum of electronic and thermal Energies = -270.731410 hartree  
 Sum of electronic and thermal Enthalpies = -270.730466 hartree  
 Sum of electronic and thermal Free Energies = -270.766757 hartree  
 SMD(CH<sub>2</sub>Cl<sub>2</sub>)/UM062X/6-311g(d,p)  
 E(UM062X) = -270.863067 hartree  
 Gibbs Free Energy in CH<sub>2</sub>Cl<sub>2</sub> = -270.77762 hartree  
 The number of Imaginary frequencies = 0

| Center Number | Atomic Number | Atomic Type | Coordinates (Angstroms) |           |           |
|---------------|---------------|-------------|-------------------------|-----------|-----------|
|               |               |             | X                       | Y         | Z         |
| 1             | 6             | 0           | -1.832861               | 0.000000  | -0.000010 |
| 2             | 6             | 0           | -1.130222               | -1.207353 | -0.000005 |
| 3             | 6             | 0           | 0.251932                | -1.212821 | 0.000003  |
| 4             | 6             | 0           | 0.987232                | 0.000000  | 0.000005  |
| 5             | 6             | 0           | 0.251932                | 1.212821  | 0.000000  |
| 6             | 6             | 0           | -1.130222               | 1.207353  | -0.000008 |
| 7             | 1             | 0           | -2.915847               | 0.000000  | -0.000016 |
| 8             | 1             | 0           | -1.671470               | -2.146260 | -0.000006 |
| 9             | 1             | 0           | 0.793878                | -2.152360 | 0.000007  |
| 10            | 1             | 0           | 0.793877                | 2.152360  | 0.000002  |
| 11            | 1             | 0           | -1.671470               | 2.146260  | -0.000012 |
| 12            | 6             | 0           | 2.396542                | 0.000000  | 0.000013  |
| 13            | 1             | 0           | 2.952519                | -0.927818 | 0.000017  |
| 14            | 1             | 0           | 2.952519                | 0.927818  | 0.000015  |

### Int-A

UM062X/6-311g(d,p)  
 E(UM062X) = -1269.704040 hartree  
 Zero-point Energy Correction = 0.445344 hartree  
 Thermal Correction to Energy = 0.471111 hartree  
 Thermal correction to Enthalpy = 0.472055 hartree  
 Thermal correction to Gibbs Free Energy = 0.386886 hartree  
 Sum of electronic and Zero-point Energies = -1269.258696 hartree  
 Sum of electronic and thermal Energies = -1269.232929 hartree  
 Sum of electronic and thermal Enthalpies = -1269.231985 hartree  
 Sum of electronic and thermal Free Energies = -1269.317154 hartree  
 SMD(CH<sub>2</sub>Cl<sub>2</sub>)/UM062X/6-311g(d,p)  
 E(UM062X) = -1269.739887 hartree  
 Gibbs Free Energy in CH<sub>2</sub>Cl<sub>2</sub> = -1269.353 hartree  
 The number of Imaginary frequencies = 0

| Center Number | Atomic Number | Atomic Type | Coordinates (Angstroms) |           |           |
|---------------|---------------|-------------|-------------------------|-----------|-----------|
|               |               |             | X                       | Y         | Z         |
| 1             | 6             | 0           | -2.842827               | 4.784274  | -0.464954 |
| 2             | 6             | 0           | -3.197440               | 3.783520  | -1.365350 |
| 3             | 6             | 0           | -1.735116               | 4.602252  | 0.357721  |
| 4             | 6             | 0           | -2.459111               | 2.609402  | -1.437878 |
| 5             | 1             | 0           | -4.047218               | 3.922977  | -2.023455 |
| 6             | 6             | 0           | -0.995654               | 3.428978  | 0.285726  |
| 7             | 1             | 0           | -1.450881               | 5.373985  | 1.063695  |
| 8             | 6             | 0           | -1.344374               | 2.408026  | -0.610469 |
| 9             | 1             | 0           | -2.723521               | 1.850925  | -2.165739 |
| 10            | 1             | 0           | -0.146044               | 3.283872  | 0.944046  |
| 11            | 6             | 0           | -0.524492               | 1.191198  | -0.700726 |
| 12            | 6             | 0           | -1.092293               | -0.137403 | -0.801372 |
| 13            | 6             | 0           | 0.856688                | 1.281716  | -0.667830 |
| 14            | 6             | 0           | -2.449730               | -0.454114 | -0.669023 |
| 15            | 6             | 0           | -0.210400               | -1.225385 | -0.973787 |
| 16            | 6             | 0           | -2.918500               | -1.759137 | -0.749586 |
| 17            | 1             | 0           | -3.155501               | 0.341313  | -0.468584 |
| 18            | 6             | 0           | -0.651791               | -2.530108 | -1.068933 |
| 19            | 6             | 0           | -2.014347               | -2.802877 | -0.958422 |
| 20            | 1             | 0           | 0.056896                | -3.337249 | -1.201125 |
| 21            | 1             | 0           | -3.421508               | 5.698281  | -0.408164 |
| 22            | 1             | 0           | 1.327527                | 2.254357  | -0.566399 |
| 23            | 8             | 0           | 1.140079                | -1.049506 | -1.040467 |
| 24            | 1             | 0           | -3.976665               | -1.947918 | -0.634307 |
| 25            | 6             | 0           | 1.684771                | 0.182572  | -0.799829 |
| 26            | 6             | 0           | 3.136720                | 0.162310  | -0.728787 |
| 27            | 6             | 0           | 3.871221                | 1.306222  | -0.370035 |
| 28            | 6             | 0           | 3.841192                | -1.025677 | -0.986587 |
| 29            | 6             | 0           | 5.253338                | 1.261732  | -0.281608 |
| 30            | 1             | 0           | 3.362259                | 2.235558  | -0.146775 |
| 31            | 6             | 0           | 5.225832                | -1.061472 | -0.894629 |
| 32            | 1             | 0           | 3.291171                | -1.917398 | -1.255429 |
| 33            | 6             | 0           | 5.942099                | 0.078311  | -0.542988 |
| 34            | 1             | 0           | 5.798198                | 2.155495  | -0.001215 |
| 35            | 1             | 0           | 5.749089                | -1.988322 | -1.098848 |
| 36            | 1             | 0           | 7.022271                | 0.046996  | -0.470241 |
| 37            | 6             | 0           | 2.005452                | -1.612594 | 2.008239  |
| 38            | 1             | 0           | 2.116243                | -2.667187 | 1.792405  |
| 39            | 1             | 0           | 2.894667                | -0.995848 | 2.010210  |
| 40            | 6             | 0           | 0.734865                | -1.059764 | 2.273292  |
| 41            | 6             | 0           | -0.432713               | -1.866748 | 2.275017  |
| 42            | 6             | 0           | 0.576378                | 0.323307  | 0.539039  |
| 43            | 6             | 0           | -1.676288               | -1.318622 | 2.521112  |
| 44            | 1             | 0           | -0.335404               | -2.927213 | 2.067951  |
| 45            | 6             | 0           | -0.673994               | 0.861997  | -2.786366 |
| 46            | 1             | 0           | 1.457758                | 0.957284  | 2.537491  |
| 47            | 6             | 0           | -1.808916               | 0.049635  | 2.774497  |
| 48            | 1             | 0           | -2.555322               | -1.952863 | 2.505359  |
| 49            | 1             | 0           | -0.776987               | 1.922074  | 2.987482  |
| 50            | 1             | 0           | -2.786225               | 0.478794  | 2.960013  |
| 51            | 8             | 0           | -2.360475               | -4.111215 | -1.049907 |
| 52            | 6             | 0           | -3.728285               | -4.440052 | -0.920840 |
| 53            | 1             | 0           | -4.324417               | -3.964776 | -1.705644 |
| 54            | 1             | 0           | -3.788877               | -5.520889 | -1.024071 |
| 55            | 1             | 0           | -4.114212               | -4.145470 | 0.060078  |

### TS-1

UM062X/6-311g(d,p)  
 E(UM062X) = -1269.656599 hartree  
 Zero-point Energy Correction = 0.445911 hartree  
 Thermal Correction to Energy = 0.471321 hartree  
 Thermal correction to Enthalpy = 0.472265 hartree  
 Thermal correction to Gibbs Free Energy = 0.388688 hartree  
 Sum of electronic and Zero-point Energies = -1269.210688 hartree  
 Sum of electronic and thermal Energies = -1269.185278 hartree  
 Sum of electronic and thermal Enthalpies = -1269.184334 hartree  
 Sum of electronic and thermal Free Energies = -1269.267911 hartree  
 SMD(CH<sub>2</sub>Cl<sub>2</sub>)/UM062X/6-311g(d,p)  
 E(UM062X) = -1269.2679 hartree  
 Gibbs Free Energy in CH<sub>2</sub>Cl<sub>2</sub> = -796477.67 hartree  
 The number of Imaginary frequencies = 1

| Center Number | Atomic Number | Atomic Type | Coordinates (Angstroms) |          |           |
|---------------|---------------|-------------|-------------------------|----------|-----------|
|               |               |             | X                       | Y        | Z         |
| 1             | 6             | 0           | -1.971348               | 5.059087 | -0.931440 |
| 2             | 6             | 0           | -2.474476               | 4.022463 | -1.716532 |
| 3             | 6             | 0           | -0.906998               | 4.802543 | -0.071343 |

|    |   |   |           |           |           |
|----|---|---|-----------|-----------|-----------|
| 4  | 6 | 0 | -1.939424 | 2.746975  | -1.629056 |
| 5  | 1 | 0 | -3.279745 | 4.215803  | -2.416016 |
| 6  | 6 | 0 | -0.361557 | 3.529674  | 0.012752  |
| 7  | 1 | 0 | -0.499385 | 5.600523  | 0.538800  |
| 8  | 6 | 0 | -0.877354 | 2.459879  | -0.746902 |
| 9  | 1 | 0 | -2.308213 | 1.967986  | -2.285072 |
| 10 | 1 | 0 | 0.460373  | 3.346547  | 0.695421  |
| 11 | 6 | 0 | -0.279219 | 1.138963  | -0.646233 |
| 12 | 6 | 0 | -0.989695 | -0.074804 | -0.738804 |
| 13 | 6 | 0 | 1.160250  | 1.031121  | -0.426795 |
| 14 | 6 | 0 | -2.405676 | -0.206537 | -0.785493 |
| 15 | 6 | 0 | -0.267606 | -1.310925 | -0.722150 |
| 16 | 6 | 0 | -3.033398 | -1.423258 | -0.932781 |
| 17 | 1 | 0 | -3.011563 | 0.681025  | -0.665748 |
| 18 | 6 | 0 | -0.886861 | -2.534638 | -0.901819 |
| 19 | 6 | 0 | -2.269549 | -2.601446 | -1.028094 |
| 20 | 1 | 0 | -0.296844 | -3.442134 | -0.904145 |
| 21 | 1 | 0 | -2.392484 | 6.054487  | -1.001628 |
| 22 | 1 | 0 | 1.780937  | 1.914197  | -0.470223 |
| 23 | 8 | 0 | 1.070739  | -1.357576 | -0.505423 |
| 24 | 1 | 0 | -4.114083 | -1.458340 | -0.954168 |
| 25 | 6 | 0 | 1.758584  | -0.196892 | -0.145158 |
| 26 | 6 | 0 | 3.231365  | -0.369670 | -0.339298 |
| 27 | 6 | 0 | 4.114836  | 0.633797  | 0.683338  |
| 28 | 6 | 0 | 3.745844  | -1.533942 | -0.909412 |
| 29 | 6 | 0 | 5.482943  | 0.484679  | -0.110311 |
| 30 | 1 | 0 | 3.732921  | 1.535817  | 0.534033  |
| 31 | 6 | 0 | 5.118880  | -1.680855 | -1.084553 |
| 32 | 1 | 0 | 3.068779  | -2.316310 | -1.224852 |
| 33 | 6 | 0 | 5.991898  | -0.675374 | -0.688733 |
| 34 | 1 | 0 | 6.154248  | 1.273401  | 0.207980  |
| 35 | 1 | 0 | 5.504512  | -2.587438 | -1.535920 |
| 36 | 1 | 0 | 7.060004  | -0.792881 | -0.825766 |
| 37 | 6 | 0 | 1.695563  | -0.461313 | 1.834487  |
| 38 | 1 | 0 | 2.187092  | -1.430309 | 1.850878  |
| 39 | 1 | 0 | 2.332301  | 0.361242  | 2.145694  |
| 40 | 6 | 0 | 0.316439  | -0.420672 | 2.278834  |
| 41 | 6 | 0 | -0.476519 | -1.579836 | 2.278115  |
| 42 | 6 | 0 | -0.286598 | 0.799866  | 2.633250  |
| 43 | 6 | 0 | -1.824963 | -1.518956 | 2.603941  |
| 44 | 1 | 0 | -0.024440 | -2.526998 | 2.003393  |
| 45 | 6 | 0 | -1.632544 | 0.860525  | 2.952426  |
| 46 | 1 | 0 | 0.314837  | 1.703279  | 2.636811  |
| 47 | 6 | 0 | -2.408469 | -0.299945 | 2.936652  |
| 48 | 1 | 0 | -2.423208 | -2.422743 | 2.857663  |
| 49 | 1 | 0 | -2.083734 | 1.811964  | 3.208714  |
| 50 | 1 | 0 | -3.462904 | -0.250248 | 3.181279  |
| 51 | 8 | 0 | -2.794102 | -3.840505 | -1.201051 |
| 52 | 6 | 0 | -4.197745 | -3.954346 | -1.313858 |
| 53 | 1 | 0 | -4.573127 | -3.383015 | -2.168115 |
| 54 | 1 | 0 | -4.401939 | -5.011455 | -1.467077 |
| 55 | 1 | 0 | -4.697037 | -3.616720 | -0.400335 |

**3aa**  
UM062X/6-311g(d,p)  
E(UM062X) = -1269.774432 hartree  
Zero-point Energy Correction = 0.451798 hartree  
Thermal Correction to Energy = 0.476746 hartree  
Thermal correction to Enthalpy = 0.477690 hartree  
Thermal correction to Gibbs Free Energy = 0.395930 hartree  
Sum of electronic and Zero-point Energies = -1269.322635 hartree  
Sum of electronic and thermal Energies = -1269.297686 hartree  
Sum of electronic and thermal Enthalpies = -1269.296742 hartree  
Sum of electronic and thermal Free Energies = -1269.378502 hartree  
SMD(CHCl<sub>2</sub>)/UM062X/6-311g(d,p)  
E(UM062X) = -1269.8113 hartree  
Gibbs Free Energy in CHCl<sub>2</sub> = -1269.4154 hartree  
The number of Imaginary frequencies = 0

| Center Number | Atomic Number | Atomic Type | Coordinates (Angstroms) |           |           |
|---------------|---------------|-------------|-------------------------|-----------|-----------|
|               |               |             | X                       | Y         | Z         |
| 1             | 6             | 0           | -1.170352               | 5.284683  | -0.880218 |
| 2             | 6             | 0           | -1.425068               | 4.355786  | -1.886032 |
| 3             | 6             | 0           | -0.551743               | 4.874231  | 0.295110  |
| 4             | 6             | 0           | -1.066048               | 3.024817  | -1.715715 |
| 5             | 1             | 0           | -1.901500               | 4.670509  | -2.807064 |
| 6             | 6             | 0           | -0.187811               | 3.541937  | 0.463364  |
| 7             | 1             | 0           | -0.357019               | 5.589808  | 1.085307  |
| 8             | 6             | 0           | -0.434979               | 2.603809  | -0.540723 |
| 9             | 1             | 0           | -1.258645               | 2.303033  | -2.501799 |
| 10            | 1             | 0           | 0.281695                | 3.216067  | 1.384673  |
| 11            | 6             | 0           | -0.008241               | 1.192007  | -0.369237 |
| 12            | 6             | 0           | -0.945537               | 0.096700  | -0.645803 |
| 13            | 6             | 0           | 1.240743                | 0.889706  | 0.005795  |
| 14            | 6             | 0           | -2.323098               | 0.242957  | -0.772107 |
| 15            | 6             | 0           | -0.412264               | -1.195659 | -0.782611 |
| 16            | 6             | 0           | -3.152421               | -0.832209 | -1.078491 |
| 17            | 1             | 0           | -2.762516               | 1.222770  | -0.625686 |
| 18            | 6             | 0           | -1.205679               | -2.270422 | -1.136466 |
| 19            | 6             | 0           | -2.581243               | -2.089539 | -1.281004 |
| 20            | 1             | 0           | -0.773671               | -3.256086 | -1.251862 |
| 21            | 1             | 0           | -1.454820               | 6.321748  | -1.012524 |
| 22            | 1             | 0           | 1.976315                | 1.670375  | 0.163916  |
| 23            | 8             | 0           | 0.911032                | -1.440154 | -0.588417 |
| 24            | 1             | 0           | -4.218580               | -0.676369 | -1.159288 |
| 25            | 6             | 0           | 1.681020                | -0.537674 | 0.221723  |
| 26            | 6             | 0           | 3.137181                | -0.717834 | -0.196704 |

|    |   |   |           |           |           |
|----|---|---|-----------|-----------|-----------|
| 27 | 6 | 0 | 4.132131  | 0.036564  | 0.430028  |
| 28 | 6 | 0 | 3.506043  | -1.628750 | -1.183536 |
| 29 | 6 | 0 | 5.467248  | -0.115374 | 0.078465  |
| 30 | 1 | 0 | 3.868425  | 0.755161  | 1.199208  |
| 31 | 6 | 0 | 4.845211  | -1.781747 | -1.534228 |
| 32 | 1 | 0 | 2.742580  | -2.213137 | -1.677957 |
| 33 | 6 | 0 | 5.829496  | -1.028890 | -0.906956 |
| 34 | 1 | 0 | 6.224565  | 0.480450  | 0.574084  |
| 35 | 1 | 0 | 5.116183  | -2.493957 | -2.304859 |
| 36 | 1 | 0 | 6.870213  | -1.149377 | -1.182887 |
| 37 | 6 | 0 | 1.534776  | -0.969347 | 1.714401  |
| 38 | 1 | 0 | 1.874030  | -2.007422 | 1.773074  |
| 39 | 1 | 0 | 2.224410  | -0.361867 | 2.305553  |
| 40 | 6 | 0 | 0.134646  | -0.831492 | 2.251923  |
| 41 | 6 | 0 | -0.774007 | -1.885091 | 2.149836  |
| 42 | 6 | 0 | -0.304853 | 0.379248  | 2.789441  |
| 43 | 6 | 0 | -2.101910 | -1.719316 | 2.525829  |
| 44 | 1 | 0 | -0.442204 | -2.832353 | 1.737328  |
| 45 | 6 | 0 | -1.630698 | 0.551140  | 3.170840  |
| 46 | 1 | 0 | 0.398762  | 1.198895  | 2.894526  |
| 47 | 6 | 0 | -2.535833 | -0.496068 | 3.027604  |
| 48 | 1 | 0 | -2.798360 | -2.543003 | 2.419464  |
| 49 | 1 | 0 | -1.958141 | 1.502135  | 3.574814  |
| 50 | 1 | 0 | -3.572384 | -0.361775 | 3.313751  |
| 51 | 8 | 0 | -3.285384 | -3.205246 | -1.600468 |
| 52 | 6 | 0 | -4.686493 | -3.083778 | -1.729513 |
| 53 | 1 | 0 | -4.950543 | -2.382656 | -2.527010 |
| 54 | 1 | 0 | -5.052438 | -4.075959 | -1.983502 |
| 55 | 1 | 0 | -5.142853 | -2.756160 | -0.790274 |

**Benzopyrylium cation (D)**

UM062X/6-311g(d,p)  
E(UM062X) = -998.636397 hartree  
Zero-point Energy Correction = 0.332247 hartree  
Thermal Correction to Energy = 0.351097 hartree  
Thermal correction to Enthalpy = 0.352041 hartree  
Thermal correction to Gibbs Free Energy = 0.283910 hartree  
Sum of electronic and Zero-point Energies = -998.304150 hartree  
Sum of electronic and thermal Energies = -998.285301 hartree  
Sum of electronic and thermal Enthalpies = -998.284357 hartree  
Sum of electronic and thermal Free Energies = -998.352487 hartree  
SMD(CHCl<sub>2</sub>)/UM062X/6-311g(d,p)  
E(UM062X) = -998.716682 hartree  
Gibbs Free Energy in CHCl<sub>2</sub> = -998.43277 hartree  
The number of Imaginary frequencies = 0

| Center Number | Atomic Number | Atomic Type | Coordinates (Angstroms) |           |           |
|---------------|---------------|-------------|-------------------------|-----------|-----------|
|               |               |             | X                       | Y         | Z         |
| 1             | 6             | 0           | 2.617019                | 4.685525  | 0.160251  |
| 2             | 6             | 0           | 2.948726                | 3.652616  | 1.032467  |
| 3             | 6             | 0           | 1.602290                | 4.511606  | -0.776684 |
| 4             | 6             | 0           | 2.281804                | 2.437699  | 0.958083  |
| 5             | 1             | 0           | 3.724023                | 3.795602  | 1.774790  |
| 6             | 6             | 0           | 0.912508                | 3.309007  | -0.838102 |
| 7             | 1             | 0           | 1.347765                | 5.313655  | -1.458165 |
| 8             | 6             | 0           | 1.257690                | 2.258045  | 0.019701  |
| 9             | 1             | 0           | 2.522709                | 1.642732  | 1.654702  |
| 10            | 1             | 0           | 0.128805                | 3.169490  | -1.574523 |
| 11            | 6             | 0           | 0.505066                | 0.995056  | -0.037172 |
| 12            | 6             | 0           | 1.146002                | -0.272940 | -0.059100 |
| 13            | 6             | 0           | -0.888145               | 1.034165  | -0.050393 |
| 14            | 6             | 0           | 2.541124                | -0.481637 | -0.174770 |
| 15            | 6             | 0           | 0.331806                | -1.427558 | -0.014009 |
| 16            | 6             | 0           | -1.632813               | -0.133737 | -0.017311 |
| 17            | 6             | 0           | 3.071772                | -1.745100 | -0.190124 |
| 18            | 1             | 0           | 3.194334                | 0.374840  | -0.276960 |
| 19            | 6             | 0           | 0.839598                | -2.709669 | -0.016935 |
| 20            | 6             | 0           | 2.220889                | -2.876207 | -0.094085 |
| 21            | 1             | 0           | 0.186424                | -3.570949 | 0.023634  |
| 22            | 1             | 0           | 3.145973                | 5.629118  | 0.214647  |
| 23            | 1             | 0           | -1.397763               | 1.984544  | 0.002026  |
| 24            | 6             | 0           | -3.086983               | -0.218617 | 0.023021  |
| 25            | 6             | 0           | -3.708753               | -1.418727 | 0.397575  |
| 26            | 6             | 0           | -3.870703               | 0.894184  | -0.315252 |
| 27            | 6             | 0           | -5.091153               | -1.494880 | 0.445201  |
| 28            | 1             | 0           | -3.108190               | -2.279317 | 0.661162  |
| 29            | 6             | 0           | -5.252314               | 0.806424  | -0.272597 |
| 30            | 1             | 0           | -3.410138               | 1.819863  | -0.636397 |
| 31            | 6             | 0           | -5.863388               | -0.385094 | 0.111028  |
| 32            | 1             | 0           | -5.568955               | -2.419261 | 0.743819  |
| 33            | 1             | 0           | -5.854546               | 1.664308  | -0.543028 |
| 34            | 1             | 0           | -6.944138               | -0.449129 | 0.146763  |
| 35            | 8             | 0           | -1.019904               | -1.310133 | 0.022013  |
| 36            | 1             | 0           | 4.140321                | -1.872396 | -0.291521 |
| 37            | 8             | 0           | 2.654727                | -4.130096 | -0.091649 |
| 38            | 6             | 0           | 4.055322                | -4.393226 | -0.174503 |
| 39            | 1             | 0           | 4.580290                | -3.949070 | 0.673614  |
| 40            | 1             | 0           | 4.148869                | -5.474306 | -0.138590 |
| 41            | 1             | 0           | 4.461461                | -4.019515 | -1.116614 |

**Int-B**

UM062X/6-311g(d,p)  
E(UM062X) = -1269.509834 hartree  
Zero-point Energy Correction = 0.448238 hartree  
Thermal Correction to Energy = 0.474662 hartree

Thermal correction to Enthalpy = 0.475606 hartree  
 Thermal correction to Gibbs Free Energy = 0.388824 hartree  
 Sum of electronic and Zero-point Energies = -1269.061596 hartree  
 Sum of electronic and thermal Energies = -1269.035172 hartree  
 Sum of electronic and thermal Enthalpies = -1269.034228 hartree  
 Sum of electronic and thermal Free Energies = -1269.121011 hartree  
 SMD(CH<sub>2</sub>Cl<sub>2</sub>)/UMO62X/6-311g(d,p)  
 E(UMO62X) = -1269.5938 hartree  
 Gibbs Free Energy in CH<sub>2</sub>Cl<sub>2</sub> = -1269.205 hartree  
 The number of Imaginary frequencies = 0

| Center Number | Atomic Number | Atomic Type | Coordinates (Angstroms) |           |           |
|---------------|---------------|-------------|-------------------------|-----------|-----------|
|               |               |             | X                       | Y         | Z         |
| 1             | 6             | 0           | -2.474315               | 4.801336  | -0.854059 |
| 2             | 6             | 0           | -2.793308               | 3.786411  | -1.750887 |
| 3             | 6             | 0           | -1.479648               | 4.603112  | 0.099935  |
| 4             | 6             | 0           | -2.136072               | 2.565168  | -1.683588 |
| 5             | 1             | 0           | -3.549975               | 3.948126  | -2.508487 |
| 6             | 6             | 0           | -0.802843               | 3.393206  | 0.156064  |
| 7             | 1             | 0           | -1.230225               | 5.393336  | 0.797172  |
| 8             | 6             | 0           | -1.136902               | 2.357630  | -0.724680 |
| 9             | 1             | 0           | -2.365276               | 1.787031  | -2.402522 |
| 10            | 1             | 0           | -0.034283               | 3.233070  | 0.903626  |
| 11            | 6             | 0           | -0.391013               | 1.088990  | -0.677346 |
| 12            | 6             | 0           | -1.034600               | -0.176171 | -0.734964 |
| 13            | 6             | 0           | 1.001258                | 1.122051  | -0.618114 |
| 14            | 6             | 0           | -2.433192               | -0.385688 | -0.696278 |
| 15            | 6             | 0           | -0.221711               | -1.329523 | -0.802772 |
| 16            | 6             | 0           | 1.741903                | -0.046384 | -0.656556 |
| 17            | 6             | 0           | -2.967753               | -1.644886 | -0.786607 |
| 18            | 1             | 0           | -3.087873               | 0.466036  | -0.567590 |
| 19            | 6             | 0           | -0.732463               | -2.607649 | -0.901884 |
| 20            | 6             | 0           | -2.114942               | -2.770946 | -0.903112 |
| 21            | 1             | 0           | -0.079311               | -3.468041 | -0.958385 |
| 22            | 1             | 0           | -2.994410               | 5.750126  | -0.903812 |
| 23            | 1             | 0           | 1.515287                | 2.071537  | -0.616439 |
| 24            | 6             | 0           | 3.199515                | -0.135155 | -0.648491 |
| 25            | 6             | 0           | 3.831199                | -1.328353 | -1.023209 |
| 26            | 6             | 0           | 3.973986                | 0.966599  | -0.259545 |
| 27            | 6             | 0           | 5.215222                | -1.410907 | -1.016071 |
| 28            | 1             | 0           | 3.238383                | -2.180587 | -1.328273 |
| 29            | 6             | 0           | 5.356070                | 0.874142  | -0.249285 |
| 30            | 1             | 0           | 3.503871                | 1.888343  | 0.060127  |
| 31            | 6             | 0           | 5.978593                | -0.312885 | -0.629614 |
| 32            | 1             | 0           | 5.700235                | -2.331758 | -1.314369 |
| 33            | 1             | 0           | 5.950126                | 1.725143  | 0.058890  |
| 34            | 1             | 0           | 7.059615                | -0.381219 | -0.623282 |
| 35            | 8             | 0           | 1.129493                | -1.218570 | -0.768453 |
| 36            | 1             | 0           | -4.040349               | -1.772269 | -0.745518 |
| 37            | 8             | 0           | -2.551474               | -4.024106 | -0.955252 |
| 38            | 6             | 0           | -3.954394               | -4.279750 | -1.009919 |
| 39            | 1             | 0           | -4.427512               | -3.784502 | -1.860408 |
| 40            | 1             | 0           | -4.052124               | -5.356385 | -1.112091 |
| 41            | 1             | 0           | -4.415705               | -3.955980 | -0.074321 |
| 42            | 6             | 0           | 0.591026                | -0.427148 | 2.510178  |
| 43            | 6             | 0           | -0.270905               | -1.551060 | 2.421308  |
| 44            | 6             | 0           | -1.642885               | -1.400717 | 2.495108  |
| 45            | 6             | 0           | -2.209214               | -0.131880 | 2.648219  |
| 46            | 6             | 0           | -1.381691               | 0.989832  | 2.738212  |
| 47            | 6             | 0           | -0.007031               | 0.848209  | 2.674745  |
| 48            | 1             | 0           | 0.165061                | -2.538566 | 2.309668  |
| 49            | 1             | 0           | -2.282378               | -2.274792 | 2.441795  |
| 50            | 1             | 0           | -3.284687               | -0.019900 | 2.715874  |
| 51            | 1             | 0           | -1.818396               | 1.973030  | 2.872060  |
| 52            | 1             | 0           | 0.638167                | 1.715835  | 2.774295  |
| 53            | 6             | 0           | 1.991773                | -0.571269 | 2.435270  |
| 54            | 1             | 0           | 2.447661                | -1.546685 | 2.323708  |
| 55            | 1             | 0           | 2.645959                | 0.282579  | 2.555574  |

**TS-2**

UMO62X/6-311g(d,p)  
 E(UMO62X) = -1269.499080 hartree  
 Zero-point Energy Correction = 0.449581 hartree  
 Thermal Correction to Energy = 0.474588 hartree  
 Thermal correction to Enthalpy = 0.475533 hartree  
 Thermal correction to Gibbs Free Energy = 0.393891 hartree  
 Sum of electronic and Zero-point Energies = -1269.049499 hartree  
 Sum of electronic and thermal Energies = -1269.024492 hartree  
 Sum of electronic and thermal Enthalpies = -1269.023548 hartree  
 Sum of electronic and thermal Free Energies = -1269.105189 hartree  
 SMD(CH<sub>2</sub>Cl<sub>2</sub>)/UMO62X/6-311g(d,p)  
 E(UMO62X) = -1269.583961 hartree  
 Gibbs Free Energy in CH<sub>2</sub>Cl<sub>2</sub> = -1269.1903 hartree  
 The number of Imaginary frequencies = 1

| Center Number | Atomic Number | Atomic Type | Coordinates (Angstroms) |          |           |
|---------------|---------------|-------------|-------------------------|----------|-----------|
|               |               |             | X                       | Y        | Z         |
| 1             | 6             | 0           | -1.990067               | 5.070265 | -0.841720 |
| 2             | 6             | 0           | -2.304150               | 4.081053 | -1.768988 |
| 3             | 6             | 0           | -1.107351               | 4.793620 | 0.197887  |
| 4             | 6             | 0           | -1.751670               | 2.812847 | -1.650254 |
| 5             | 1             | 0           | -2.974544               | 4.300117 | -2.590849 |
| 6             | 6             | 0           | -0.540116               | 3.531246 | 0.309945  |
| 7             | 1             | 0           | -0.859775               | 5.562054 | 0.919786  |
| 8             | 6             | 0           | -0.864781               | 2.524714 | -0.605877 |
| 9             | 1             | 0           | -1.978180               | 2.052844 | -2.389387 |

|    |   |   |           |           |           |
|----|---|---|-----------|-----------|-----------|
| 10 | 1 | 0 | 0.145869  | 3.318600  | 1.122211  |
| 11 | 6 | 0 | -0.230985 | 1.194925  | -0.503065 |
| 12 | 6 | 0 | -0.983795 | -0.019983 | -0.658381 |
| 13 | 6 | 0 | -1.123190 | 1.091192  | -0.303744 |
| 14 | 6 | 0 | -2.387969 | -0.100831 | -0.699419 |
| 15 | 6 | 0 | -0.272074 | -1.235067 | -0.782901 |
| 16 | 6 | 0 | 1.766521  | -0.173885 | -0.235996 |
| 17 | 6 | 0 | -3.033936 | -1.297071 | -0.917558 |
| 18 | 1 | 0 | -2.969248 | 0.799050  | -0.543409 |
| 19 | 6 | 0 | -0.892564 | -2.441367 | -1.043652 |
| 20 | 6 | 0 | -2.282296 | -2.477562 | -1.116895 |
| 21 | 1 | 0 | -0.315864 | -3.349884 | -1.156419 |
| 22 | 1 | 0 | -2.426720 | 6.057170  | -0.933312 |
| 23 | 1 | 0 | 1.731380  | 1.980692  | -0.211132 |
| 24 | 6 | 0 | 3.231925  | -0.328500 | -0.391159 |
| 25 | 6 | 0 | 3.759442  | -1.488751 | -0.964879 |
| 26 | 6 | 0 | 4.098716  | 0.679261  | 0.047256  |
| 27 | 6 | 0 | 5.134141  | -1.627851 | -1.109506 |
| 28 | 1 | 0 | 3.096853  | -2.270390 | -1.311527 |
| 29 | 6 | 0 | 5.469569  | 0.532726  | -0.098890 |
| 30 | 1 | 0 | 3.713273  | 1.579018  | 0.513326  |
| 31 | 6 | 0 | 5.991031  | -0.621404 | -0.678461 |
| 32 | 1 | 0 | 5.535358  | -2.524696 | -1.564842 |
| 33 | 1 | 0 | 6.132599  | 1.318299  | 0.241246  |
| 34 | 1 | 0 | 7.062084  | -0.733784 | -0.792531 |
| 35 | 8 | 0 | 1.077731  | -1.264613 | -0.654431 |
| 36 | 1 | 0 | -4.114417 | -1.323082 | -0.934132 |
| 37 | 8 | 0 | -2.822465 | -3.674398 | -1.353518 |
| 38 | 6 | 0 | -4.237886 | -3.788743 | -1.464374 |
| 39 | 1 | 0 | -4.613047 | -3.166765 | -2.280083 |
| 40 | 1 | 0 | -4.429921 | -4.834860 | -1.684027 |
| 41 | 1 | 0 | -4.724025 | -3.515944 | -0.524720 |
| 42 | 6 | 0 | 0.331175  | -0.575919 | 2.269904  |
| 43 | 6 | 0 | -0.370570 | -1.800221 | 2.227577  |
| 44 | 6 | 0 | -1.718672 | -1.848599 | 2.529798  |
| 45 | 6 | 0 | -2.393430 | -0.679681 | 2.885765  |
| 46 | 6 | 0 | -1.713380 | 0.539191  | 2.954340  |
| 47 | 6 | 0 | -0.366025 | 0.591547  | 2.651134  |
| 48 | 1 | 0 | 0.161152  | -2.703251 | 1.941286  |
| 49 | 1 | 0 | -2.247995 | -2.793226 | 2.497478  |
| 50 | 1 | 0 | -3.449325 | -0.719441 | 3.126025  |
| 51 | 1 | 0 | -2.240144 | 1.438604  | 3.248985  |
| 52 | 1 | 0 | 0.173196  | 1.530595  | 2.713328  |
| 53 | 6 | 0 | 1.702963  | -0.507528 | 1.883798  |
| 54 | 1 | 0 | 2.264373  | -1.431274 | 1.788121  |
| 55 | 1 | 0 | 2.283213  | 0.363895  | 2.166973  |

**E**

UMO62X/6-311g(d,p)  
 E(UMO62X) = -1269.514329 hartree  
 Zero-point Energy Correction = 0.451603 hartree  
 Thermal Correction to Energy = 0.476738 hartree  
 Thermal correction to Enthalpy = 0.477682 hartree  
 Thermal correction to Gibbs Free Energy = 0.394866 hartree  
 Sum of electronic and Zero-point Energies = -1269.062726 hartree  
 Sum of electronic and thermal Energies = -1269.037591 hartree  
 Sum of electronic and thermal Enthalpies = -1269.036647 hartree  
 Sum of electronic and thermal Free Energies = -1269.119464 hartree  
 SMD(CH<sub>2</sub>Cl<sub>2</sub>)/UMO62X/6-311g(d,p)  
 E(UMO62X) = -1269.6023 hartree  
 Gibbs Free Energy in CH<sub>2</sub>Cl<sub>2</sub> = -1269.2074 hartree  
 The number of Imaginary frequencies = 0

| Center Number | Atomic Number | Atomic Type | Coordinates (Angstroms) |           |           |
|---------------|---------------|-------------|-------------------------|-----------|-----------|
|               |               |             | X                       | Y         | Z         |
| 1             | 6             | 0           | -1.076133               | 5.302480  | -0.842668 |
| 2             | 6             | 0           | -1.374307               | 4.387840  | -1.848536 |
| 3             | 6             | 0           | -0.447581               | 4.876362  | 0.323776  |
| 4             | 6             | 0           | -1.055055               | 3.046334  | -1.685981 |
| 5             | 1             | 0           | -1.847466               | 4.721375  | -2.763762 |
| 6             | 6             | 0           | -0.113985               | 3.538103  | 0.484391  |
| 7             | 1             | 0           | -0.218169               | 5.586945  | 1.108103  |
| 8             | 6             | 0           | -0.421594               | 2.611235  | -0.516293 |
| 9             | 1             | 0           | -1.264216               | 2.338572  | -2.480846 |
| 10            | 1             | 0           | 0.364902                | 3.205139  | 1.398648  |
| 11            | 6             | 0           | -0.041580               | 1.192406  | -0.353521 |
| 12            | 6             | 0           | -0.950328               | 0.129478  | -0.614002 |
| 13            | 6             | 0           | 1.224718                | 0.853029  | 0.055933  |
| 14            | 6             | 0           | -2.343044               | 0.313320  | -0.812508 |
| 15            | 6             | 0           | -0.432299               | -1.211650 | -0.709851 |
| 16            | 6             | 0           | 1.667985                | -0.549656 | -0.616000 |
| 17            | 6             | 0           | -3.152897               | -0.727115 | -1.164301 |
| 18            | 1             | 0           | -2.759828               | 1.301875  | -0.667420 |
| 19            | 6             | 0           | -1.231205               | -2.256467 | -1.127478 |
| 20            | 6             | 0           | -2.586687               | -2.027913 | -1.355695 |
| 21            | 1             | 0           | -0.824394               | -3.253341 | -1.231486 |
| 22            | 1             | 0           | -1.328192               | 6.348082  | -0.970023 |
| 23            | 1             | 0           | 1.947033                | 1.630439  | 0.280276  |
| 24            | 6             | 0           | 3.102527                | -0.739868 | -0.226821 |
| 25            | 6             | 0           | 3.406522                | -1.634224 | -1.249273 |
| 26            | 6             | 0           | 4.126909                | -0.002557 | 0.370462  |
| 27            | 6             | 0           | 4.726370                | -1.790851 | -1.664465 |
| 28            | 1             | 0           | 2.622237                | -2.211076 | -1.719382 |
| 29            | 6             | 0           | 5.441129                | -0.161468 | -0.048435 |
| 30            | 1             | 0           | 3.913187                | 0.699977  | 1.169660  |
| 31            | 6             | 0           | 5.744120                | -1.058383 | -1.068295 |
| 32            | 1             | 0           | 4.954525                | -2.490655 | -2.459041 |

|    |   |   |           |           |           |
|----|---|---|-----------|-----------|-----------|
| 33 | 1 | 0 | 6.227777  | 0.414370  | 0.423140  |
| 34 | 1 | 0 | 6.769014  | -1.183425 | -1.394792 |
| 35 | 8 | 0 | 0.841368  | -1.479522 | -0.453446 |
| 36 | 1 | 0 | -4.214077 | -0.567598 | -1.292893 |
| 37 | 8 | 0 | -3.297596 | -3.076708 | -1.722895 |
| 38 | 6 | 0 | -4.699864 | -2.950440 | -1.979223 |
| 39 | 1 | 0 | -4.877005 | -2.240863 | -2.788928 |
| 40 | 1 | 0 | -5.025917 | -3.941348 | -2.279549 |
| 41 | 1 | 0 | -5.227515 | -2.645843 | -1.073879 |
| 42 | 6 | 0 | 0.163261  | -0.846181 | 2.322835  |
| 43 | 6 | 0 | -0.701752 | -1.937282 | 2.227279  |
| 44 | 6 | 0 | -2.024505 | -1.833463 | 2.648687  |
| 45 | 6 | 0 | -2.495250 | -0.635236 | 3.174000  |
| 46 | 6 | 0 | -1.634780 | 0.454578  | 3.294648  |
| 47 | 6 | 0 | -0.315774 | 0.345280  | 2.873947  |
| 48 | 1 | 0 | -0.334288 | -2.874527 | 1.821029  |
| 49 | 1 | 0 | -2.680984 | -2.692843 | 2.578923  |
| 50 | 1 | 0 | -3.522200 | -0.554019 | 3.509244  |
| 51 | 1 | 0 | -1.990104 | 1.382242  | 3.727030  |
| 52 | 1 | 0 | 0.356451  | 1.191254  | 2.984646  |
| 53 | 6 | 0 | 1.563978  | -0.934851 | 1.786976  |
| 54 | 1 | 0 | 1.956016  | -1.952602 | 1.850123  |
| 55 | 1 | 0 | 2.239660  | -0.279313 | 2.338773  |

---

## 10-2. The calculation of redox potential

The redox potential of benzopyrylium cation salt ( $\mathbf{1'a^+BF_4^-}$ ) in MeCN was calculated with the UB3LYP/6-31+g(d,p) method.<sup>2</sup> The geometries of benzopyrylium cation salt ( $\mathbf{1'a^+BF_4^-}$ ) and the reduced radical ( $\mathbf{1''a}$ ) were fully optimized using the UB3LYP/6-31+g(d,p) methods in solution phase (E) by performing CPCM calculation. The nature of the stationary points and thermal corrections to Gibbs free energy (G) were obtained by frequency calculations at the same level of theory.

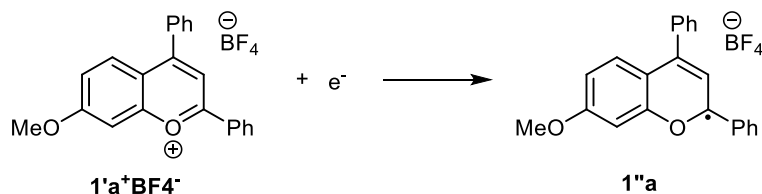

$$G(\mathbf{1'a^+BF_4^-}) = -1423.3023 \text{ hartree}$$

$$G(\mathbf{1''a}) = -1423.4490 \text{ hartree}$$

$$\Delta G = G(\mathbf{1''a}) - G(\mathbf{1'a^+BF_4^-}) = -0.146649 \text{ hartree} = -92.023641 \text{ kcal/mol}$$

$$E_{\text{red}}(\mathbf{1'a^+BF_4^-}/\mathbf{1''a}) = \Delta G/nF - E^0(\text{SHE}) + E^0(\text{SCE}) = 3.990 - 4.281 - 0.141 = -0.432 \text{ V (vs SCE)}$$

$n$  is the number of electrons transferred,  $F$  is the Faraday constant ( $23.061 \text{ kcal mol}^{-1}\text{V}^{-1}$ ).  $E^0(\text{SHE})$  is the absolute value for the standard hydrogen electrode (4.281 V) and  $E^0(\text{SCE})$  is the potential of the saturated calomel electrode (SCE) relative to SHE in acetonitrile ( $-0.141 \text{ V}$ ).

From the absorption and fluorescence spectra (Figure S1) of the preformed benzopyrylium cation salt ( $\mathbf{1'a^+BF_4^-}$ ), the redox potential of the excited  $\mathbf{1'a^{*+}BF_4^-}$  was estimated employing the following equation.

$$E_{\text{red}}^* = E_{\text{red}} + E_{0,0}$$

$E_{0,0}$ , which is the excited state energy of the benzopyrylium salt, was estimated to  $E_{0,0} = +2.73 \text{ V}$  from the crossing point between the absorption and fluorescence spectra recorded in MeCN (Figure S3).

$$E_{\text{red}}^* = +2.30 \text{ V (vs SCE in MeCN)}$$

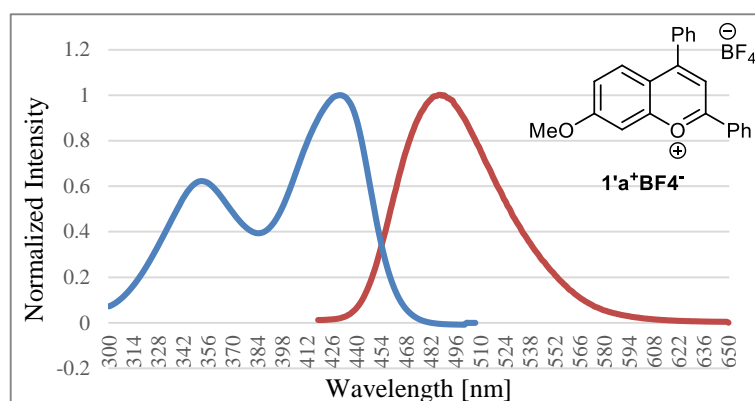

Figure S3. UV-Vis absorption spectrum of  $\mathbf{1'a^+BF_4^-}$  in MeCN at room temperature (blue). Fluorescence spectrum of  $\mathbf{1'a^+BF_4^-}$  in MeCN at room temperature upon excitation at 360 nm (orange)

<sup>2</sup> H. G. Roth, N. A. Romero and D. A. Nicewicz, *Synlett* 2016, **27**, 714–723.

## Cartesian coordinates

### 1' a BF<sub>4</sub><sup>-</sup>

CPCM(MeCN)/UB3LYP/6-31g(d,p)  
 E(UB3LYP) = -1423.583168 hartree  
 Zero-point Energy Correction = 0.343749 hartree  
 Thermal Correction to Energy = 0.369671 hartree  
 Thermal correction to Enthalpy = 0.370615 hartree  
 Thermal correction to Gibbs Free Energy = 0.280846 hartree  
 Sum of electronic and Zero-point Energies = -1423.239419 hartree  
 Sum of electronic and thermal Energies = -1423.213497 hartree  
 Sum of electronic and thermal Enthalpies = -1423.212553 hartree  
 Sum of electronic and thermal Free Energies = -1423.302322 hartree  
 The number of Imaginary frequencies = 0

| Center Number | Atomic Number | Atomic Type | Coordinates (Angstroms) |           |           |
|---------------|---------------|-------------|-------------------------|-----------|-----------|
|               |               |             | X                       | Y         | Z         |
| 1             | 6             | 0           | -6.642855               | 0.049399  | -0.320556 |
| 2             | 6             | 0           | -5.856492               | -0.748453 | -1.157609 |
| 3             | 6             | 0           | -6.033207               | 0.875570  | 0.629528  |
| 4             | 6             | 0           | -4.466727               | -0.736420 | -1.036801 |
| 5             | 1             | 0           | -6.323556               | -1.378926 | -1.907647 |
| 6             | 6             | 0           | -4.643459               | 0.909612  | 0.739196  |
| 7             | 1             | 0           | -6.638595               | 1.494804  | 1.283945  |
| 8             | 6             | 0           | -3.844509               | 0.093434  | -0.084420 |
| 9             | 1             | 0           | -3.864258               | -1.339551 | -1.707860 |
| 10            | 1             | 0           | -4.176726               | 1.547365  | 1.483421  |
| 11            | 6             | 0           | -2.372277               | 0.160083  | 0.025880  |
| 12            | 6             | 0           | -1.546936               | -1.000282 | 0.099194  |
| 13            | 6             | 0           | -1.752503               | 1.415513  | 0.048580  |
| 14            | 6             | 0           | -2.010258               | -2.338236 | 0.199298  |
| 15            | 6             | 0           | -0.136402               | -0.815921 | 0.119533  |
| 16            | 6             | 0           | -0.369051               | 1.541469  | 0.081789  |
| 17            | 6             | 0           | -1.133120               | -3.398983 | 0.266642  |
| 18            | 1             | 0           | -3.074772               | -2.529981 | 0.242347  |
| 19            | 6             | 0           | 0.768638                | -1.862459 | 0.174803  |
| 20            | 6             | 0           | 0.268323                | -3.167828 | 0.239964  |
| 21            | 1             | 0           | 1.837778                | -1.677737 | 0.178540  |
| 22            | 1             | 0           | -7.724544               | 0.031167  | -0.411285 |
| 23            | 1             | 0           | -2.358053               | 2.307249  | -0.022156 |
| 24            | 6             | 0           | 0.388191                | 2.790565  | 0.073345  |
| 25            | 6             | 0           | 1.792125                | 2.768739  | -0.070239 |
| 26            | 6             | 0           | -0.270950               | 4.030643  | 0.212901  |
| 27            | 6             | 0           | 2.510418                | 3.961675  | -0.081313 |
| 28            | 1             | 0           | 2.319426                | 1.828268  | -0.177567 |
| 29            | 6             | 0           | 0.457049                | 5.216659  | 0.203221  |
| 30            | 1             | 0           | -1.345757               | 4.078607  | 0.342312  |
| 31            | 6             | 0           | 1.848369                | 5.186868  | 0.054051  |
| 32            | 1             | 0           | 3.589107                | 3.934655  | -0.196639 |
| 33            | 1             | 0           | -0.060384               | 6.163817  | 0.315206  |
| 34            | 1             | 0           | 2.413044                | 6.114027  | 0.045341  |
| 35            | 8             | 0           | 0.394373                | 0.441605  | 0.095901  |
| 36            | 1             | 0           | -1.523755               | -4.404535 | 0.351048  |
| 37            | 8             | 0           | 1.188427                | -4.145267 | 0.291381  |
| 38            | 6             | 0           | 0.769489                | -5.520736 | 0.365714  |
| 39            | 1             | 0           | 0.176513                | -5.792630 | -0.511948 |
| 40            | 1             | 0           | 1.691627                | -6.099206 | 0.381799  |
| 41            | 1             | 0           | 0.201841                | -5.703562 | 1.282408  |
| 42            | 5             | 0           | 5.023603                | -0.618790 | -0.214414 |
| 43            | 9             | 0           | 4.074564                | -1.596216 | 0.175263  |
| 44            | 9             | 0           | 6.023815                | -0.515064 | 0.777304  |
| 45            | 9             | 0           | 5.609575                | -0.996970 | -1.442692 |
| 46            | 9             | 0           | 4.373991                | 0.628687  | -0.364727 |

|    |   |   |           |           |           |
|----|---|---|-----------|-----------|-----------|
| 17 | 6 | 0 | -1.096064 | -3.439652 | 0.234038  |
| 18 | 1 | 0 | -3.053363 | -2.588048 | 0.220854  |
| 19 | 6 | 0 | 0.749896  | -1.865782 | 0.118862  |
| 20 | 6 | 0 | 0.283445  | -3.186994 | 0.196438  |
| 21 | 1 | 0 | 1.815502  | -1.661029 | 0.112250  |
| 22 | 1 | 0 | -7.818813 | -0.049874 | -0.315477 |
| 23 | 1 | 0 | -2.434142 | 2.275853  | 0.016282  |
| 24 | 6 | 0 | 0.296239  | 2.809293  | 0.046288  |
| 25 | 6 | 0 | 1.710525  | 2.816893  | -0.011335 |
| 26 | 6 | 0 | -0.370369 | 4.057779  | 0.104174  |
| 27 | 6 | 0 | 2.418025  | 4.019401  | -0.013259 |
| 28 | 1 | 0 | 2.253710  | 1.880614  | -0.056595 |
| 29 | 6 | 0 | 0.345082  | 5.251583  | 0.100951  |
| 30 | 1 | 0 | -1.452845 | 4.100824  | 0.155421  |
| 31 | 6 | 0 | 1.745800  | 5.244734  | 0.042145  |
| 32 | 1 | 0 | 3.503201  | 3.996225  | -0.058945 |
| 33 | 1 | 0 | -0.193167 | 6.194047  | 0.146700  |
| 34 | 1 | 0 | 2.300117  | 6.178360  | 0.040583  |
| 35 | 8 | 0 | 0.376684  | 0.439649  | 0.020392  |
| 36 | 1 | 0 | -1.480820 | -4.448355 | 0.315760  |
| 37 | 8 | 0 | 1.247628  | -4.150320 | 0.241296  |
| 38 | 6 | 0 | 0.843751  | -5.520656 | 0.328840  |
| 39 | 1 | 0 | 0.243460  | -5.810945 | -0.540216 |
| 40 | 1 | 0 | 1.767218  | -6.099129 | 0.344284  |
| 41 | 1 | 0 | 0.278837  | -5.707363 | 1.248590  |
| 42 | 5 | 0 | 5.206776  | -0.567073 | -0.166447 |
| 43 | 9 | 0 | 4.207264  | -1.513596 | 0.162409  |
| 44 | 9 | 0 | 6.215212  | -0.584197 | 0.824492  |
| 45 | 9 | 0 | 5.771630  | -0.895612 | -1.420390 |
| 46 | 9 | 0 | 4.630149  | 0.721925  | -0.230914 |

### 1' aa

CPCM(MeCN)/UB3LYP/6-31g(d,p)  
 E(UB3LYP) = -1423.725140 hartree  
 Zero-point Energy Correction = 0.340688 hartree  
 Thermal Correction to Energy = 0.366921 hartree  
 Thermal correction to Enthalpy = 0.367865 hartree  
 Thermal correction to Gibbs Free Energy = 0.276169 hartree  
 Sum of electronic and Zero-point Energies = -1423.384453 hartree  
 Sum of electronic and thermal Energies = -1423.358219 hartree  
 Sum of electronic and thermal Enthalpies = -1423.357275 hartree  
 Sum of electronic and thermal Free Energies = -1423.448971 hartree  
 The number of Imaginary frequencies = 0

| Center Number | Atomic Number | Atomic Type | Coordinates (Angstroms) |           |           |
|---------------|---------------|-------------|-------------------------|-----------|-----------|
|               |               |             | X                       | Y         | Z         |
| 1             | 6             | 0           | -6.735460               | -0.021960 | -0.245801 |
| 2             | 6             | 0           | -5.953584               | -0.857921 | -1.050717 |
| 3             | 6             | 0           | -6.106532               | 0.851283  | 0.648197  |
| 4             | 6             | 0           | -4.560901               | -0.826701 | -0.959850 |
| 5             | 1             | 0           | -6.428277               | -1.531228 | -1.758960 |
| 6             | 6             | 0           | -4.713908               | 0.885123  | 0.738516  |
| 7             | 1             | 0           | -6.700665               | 1.502570  | 1.283100  |
| 8             | 6             | 0           | -3.909727               | 0.046060  | -0.062140 |
| 9             | 1             | 0           | -3.971841               | -1.461082 | -1.614456 |
| 10            | 1             | 0           | -4.241075               | 1.555119  | 1.450755  |
| 11            | 6             | 0           | -2.436854               | 0.131625  | 0.014062  |
| 12            | 6             | 0           | -1.568498               | -1.033358 | 0.064109  |
| 13            | 6             | 0           | -1.815597               | 1.387678  | 0.043353  |
| 14            | 6             | 0           | -1.992747               | -2.372297 | 0.172235  |
| 15            | 6             | 0           | -0.164527               | -0.824118 | 0.064374  |
| 16            | 6             | 0           | -0.440280               | 1.554236  | 0.047925  |



## 11. X-ray crystallographic analysis

**3ia** was recrystallized from DCM/MeOH to give a colorless block crystal. The structure of **3ia** was determined by X-ray crystallographic analysis.<sup>3</sup>

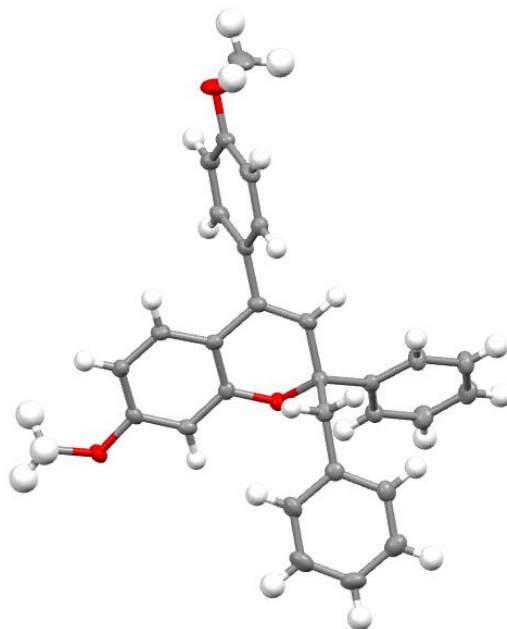

Figure S1: ORTEP Drawing of **3ia**

### *EXPERIMENTAL DETAILS*

#### A. Crystal Data

|                      |                                                                                                                 |
|----------------------|-----------------------------------------------------------------------------------------------------------------|
| Empirical Formula    | C <sub>30</sub> H <sub>26</sub> O <sub>3</sub>                                                                  |
| Formula Weight       | 434.53                                                                                                          |
| Crystal Color, Habit | colorless, block                                                                                                |
| Crystal Dimensions   | 0.350 X 0.200 X 0.200 mm                                                                                        |
| Crystal System       | monoclinic                                                                                                      |
| Lattice Type         | Primitive                                                                                                       |
| Lattice Parameters   | a = 10.1631(15) Å<br>b = 10.5208(15) Å<br>c = 10.9954(16) Å<br>β = 102.394(7) °<br>V = 1148.3(3) Å <sup>3</sup> |
| Space Group          | P2 <sub>1</sub> (#4)                                                                                            |

<sup>3</sup> J. Kikuchi, CCDC 2064775: *CSD Communication*, 2021, DOI: 10.5517/ccdc.csd.cc279kns.

|                         |                         |
|-------------------------|-------------------------|
| Z value                 | 2                       |
| $D_{\text{calc}}$       | 1.257 g/cm <sup>3</sup> |
| F <sub>000</sub>        | 460.00                  |
| $\mu(\text{MoK}\alpha)$ | 0.798 cm <sup>-1</sup>  |

## B. Intensity Measurements

|                                                        |                                                                                                           |
|--------------------------------------------------------|-----------------------------------------------------------------------------------------------------------|
| Diffractometer                                         | XtaLAB mini                                                                                               |
| Radiation                                              | MoK $\alpha$ ( $\lambda = 0.71075 \text{ \AA}$ )<br>graphite monochromated                                |
| Voltage, Current                                       | 50kV, 12mA                                                                                                |
| Temperature                                            | -123.0°C                                                                                                  |
| Detector Aperture                                      | 75.0 mm (diameter)                                                                                        |
| Data Images                                            | 540 exposures                                                                                             |
| $\omega$ oscillation Range ( $\chi=54.0, \phi=0.0$ )   | -60.0 - 120.0°                                                                                            |
| Exposure Rate                                          | 48.0 sec./°                                                                                               |
| Detector Swing Angle                                   | 30.00°                                                                                                    |
| $\omega$ oscillation Range ( $\chi=54.0, \phi=120.0$ ) | -60.0 - 120.0°                                                                                            |
| Exposure Rate                                          | 48.0 sec./°                                                                                               |
| Detector Swing Angle                                   | 30.00°                                                                                                    |
| $\omega$ oscillation Range ( $\chi=54.0, \phi=240.0$ ) | -60.0 - 120.0°                                                                                            |
| Exposure Rate                                          | 48.0 sec./°                                                                                               |
| Detector Swing Angle                                   | 30.00°                                                                                                    |
| $\omega$ oscillation Range ( $\chi=54.0, \phi=0.0$ )   | -60.0 - 120.0°                                                                                            |
| Exposure Rate                                          | 48.0 sec./°                                                                                               |
| Detector Swing Angle                                   | 30.00°                                                                                                    |
| $\omega$ oscillation Range ( $\chi=54.0, \phi=120.0$ ) | -60.0 - 120.0°                                                                                            |
| Exposure Rate                                          | 48.0 sec./°                                                                                               |
| Detector Swing Angle                                   | 30.00°                                                                                                    |
| $\omega$ oscillation Range ( $\chi=54.0, \phi=240.0$ ) | -60.0 - 120.0°                                                                                            |
| Exposure Rate                                          | 48.0 sec./°                                                                                               |
| Detector Swing Angle                                   | 30.00°                                                                                                    |
| Detector Position                                      | 50.00 mm                                                                                                  |
| Pixel Size                                             | 0.073 mm                                                                                                  |
| $2\theta_{\text{max}}$                                 | 55.0°                                                                                                     |
| No. of Reflections Measured                            | Total: 12206<br>Unique: 5252 ( $R_{\text{int}} = 0.1609$ )<br>Parsons quotients (Flack x parameter): 1432 |

Corrections

Lorentz-polarization

Absorption

(trans. factors: 0.676 - 0.984)

### C. Structure Solution and Refinement

Structure Solution

Direct Methods (SHELXT Version 2014/5)

Refinement

Full-matrix least-squares on  $F^2$

Function Minimized

$\sum w (F_o^2 - F_c^2)^2$

Least Squares Weights

$w = 1 / [ \sigma^2(F_o^2) + (0.0650 \cdot P)^2 + 0.0000 \cdot P ]$

where  $P = (\text{Max}(F_o^2, 0) + 2F_c^2)/3$

$2\theta_{\text{max}}$  cutoff

54.9°

Anomalous Dispersion

All non-hydrogen atoms

No. Observations (All reflections)

5252

No. Variables

298

Reflection/Parameter Ratio

17.62

Residuals: R1 ( $I > 2.00\sigma(I)$ )

0.0909

Residuals: R (All reflections)

0.0957

Residuals: wR2 (All reflections)

0.2228

Goodness of Fit Indicator

1.029

Flack parameter (Parsons' quotients = 1432)

-1.1(10)

Max Shift/Error in Final Cycle

0.000

Maximum peak in Final Diff. Map

0.39 e<sup>-</sup>/Å<sup>3</sup>

Minimum peak in Final Diff. Map

-0.32 e<sup>-</sup>/Å<sup>3</sup>

## 12. NMR Spectra

$^1\text{H}$  NMR (600 MHz,  $\text{C}_6\text{D}_6$ ) and  $^{13}\text{C}$  NMR (151 MHz,  $\text{C}_6\text{D}_6$ ) spectra of **1b**

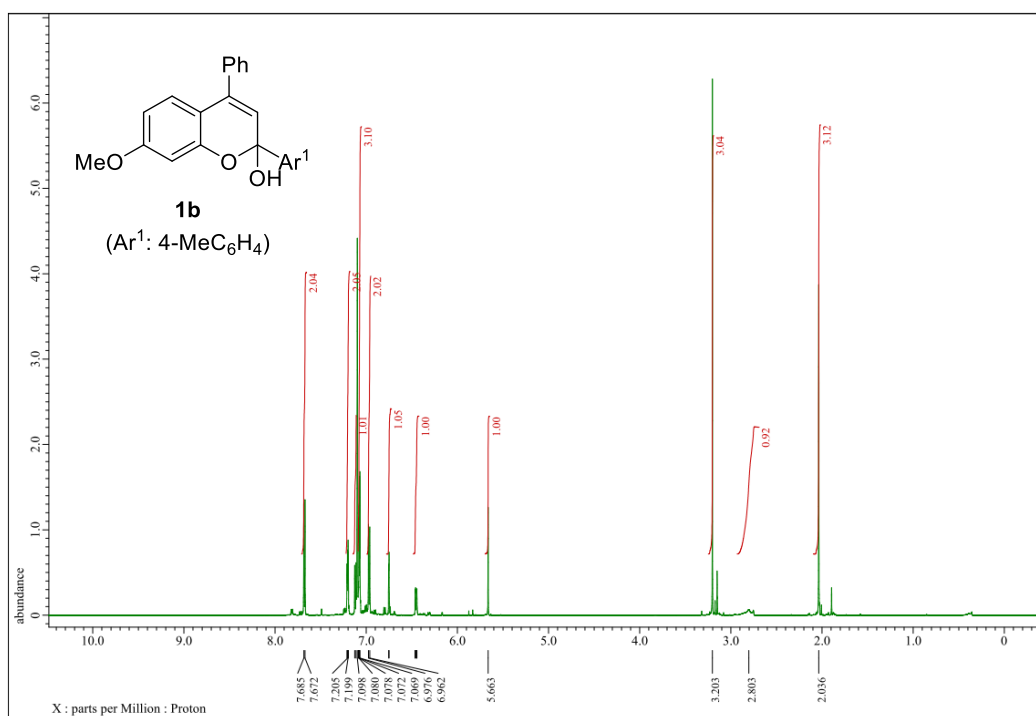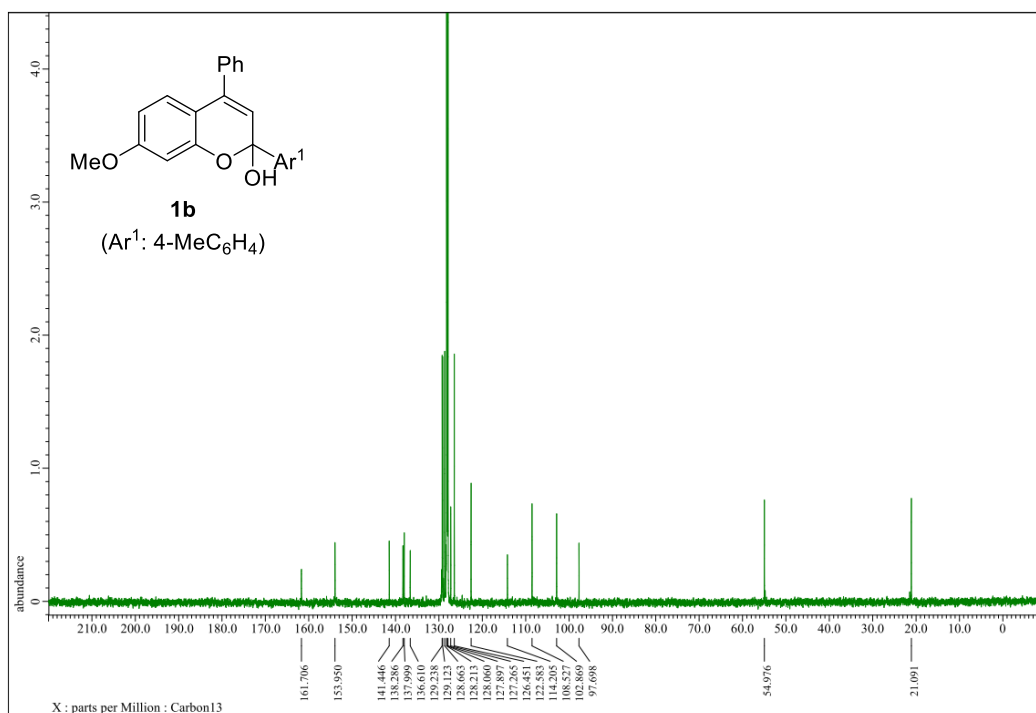

$^1\text{H}$  NMR (600 MHz,  $\text{CDCl}_3$ ) and  $^{13}\text{C}$  NMR (151 MHz,  $\text{CDCl}_3$ ) spectra of **1c**

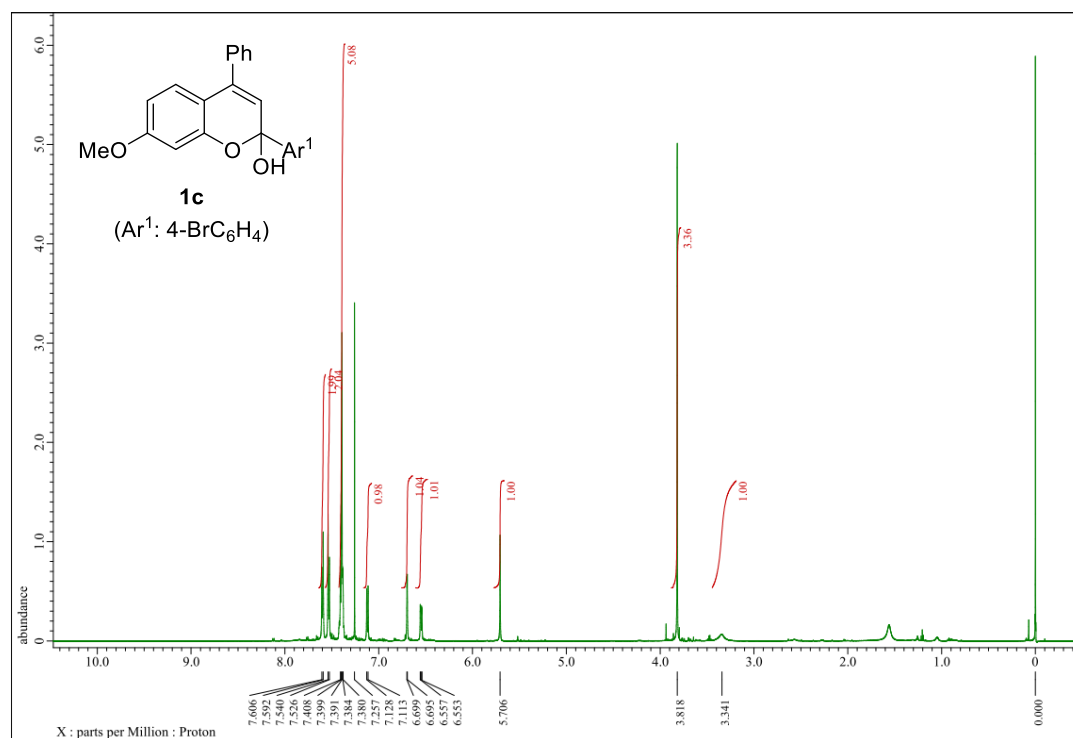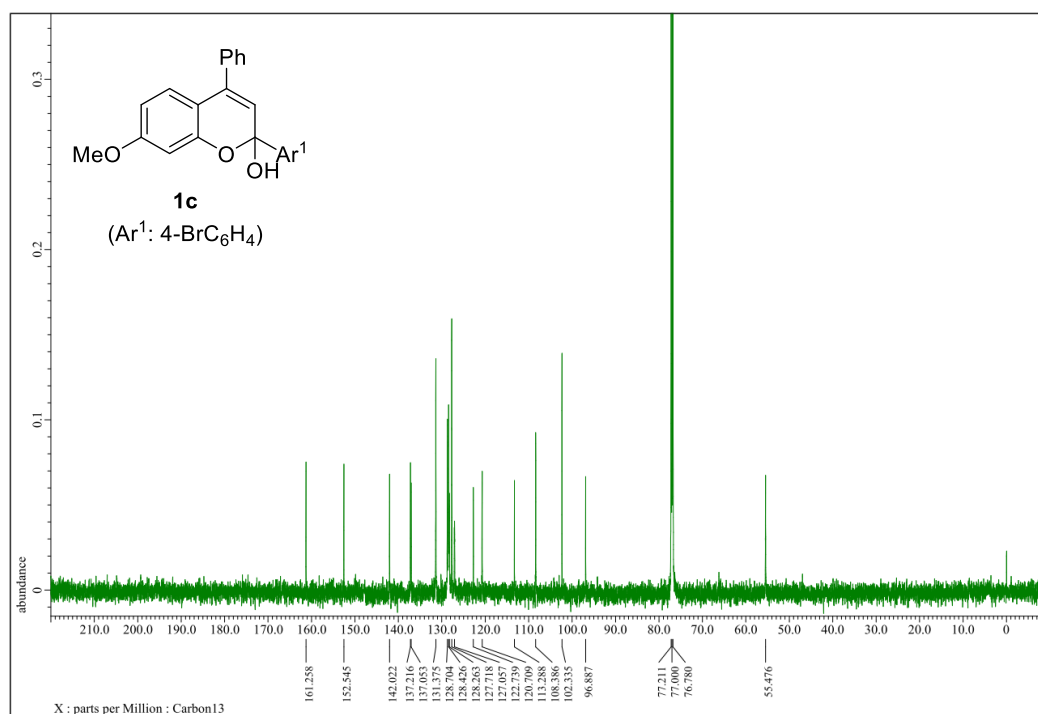

$^1\text{H}$  NMR (600 MHz,  $\text{CDCl}_3$ ) and  $^{13}\text{C}$  NMR (151 MHz,  $\text{CDCl}_3$ ) spectra of **1d**

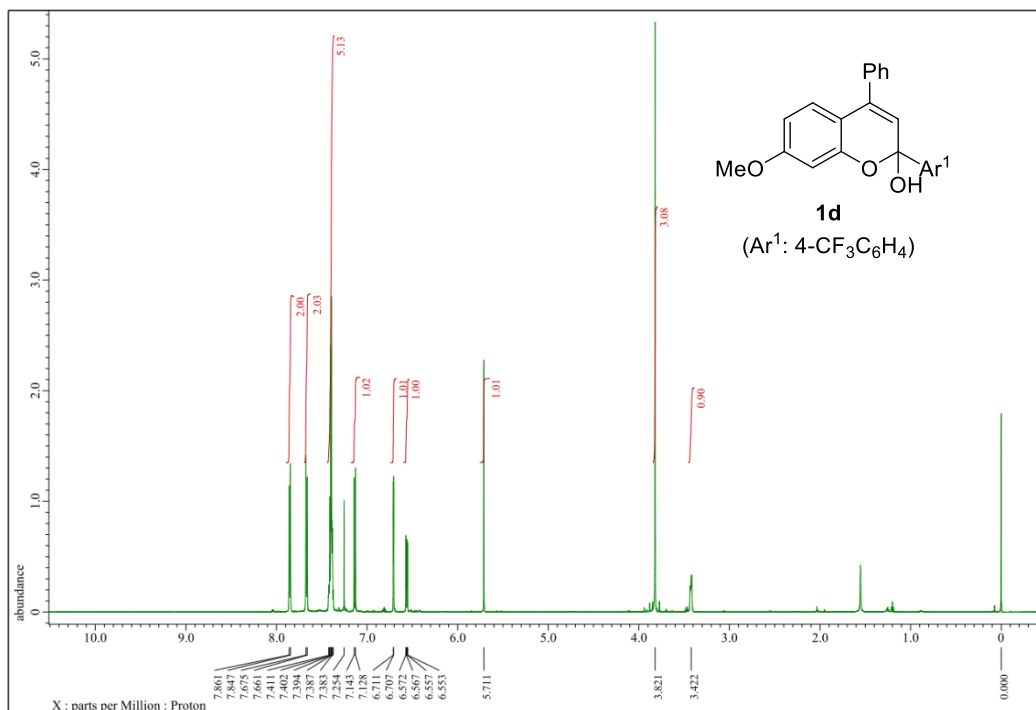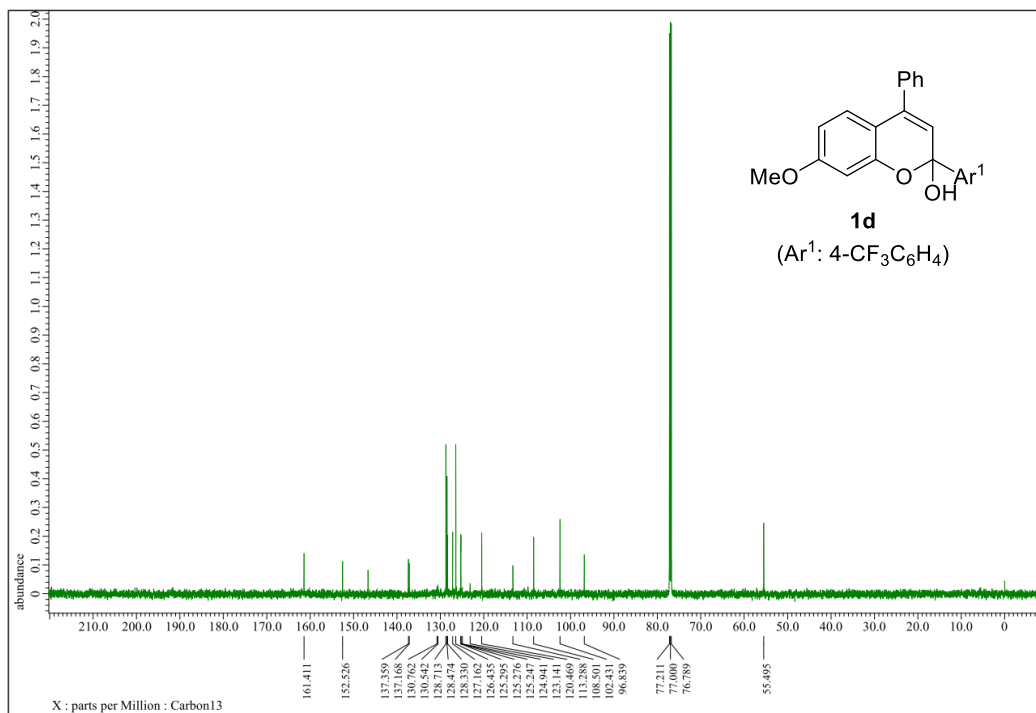

$^{19}\text{F}$  NMR (565 MHz,  $\text{CDCl}_3$ ) spectra of **1d**

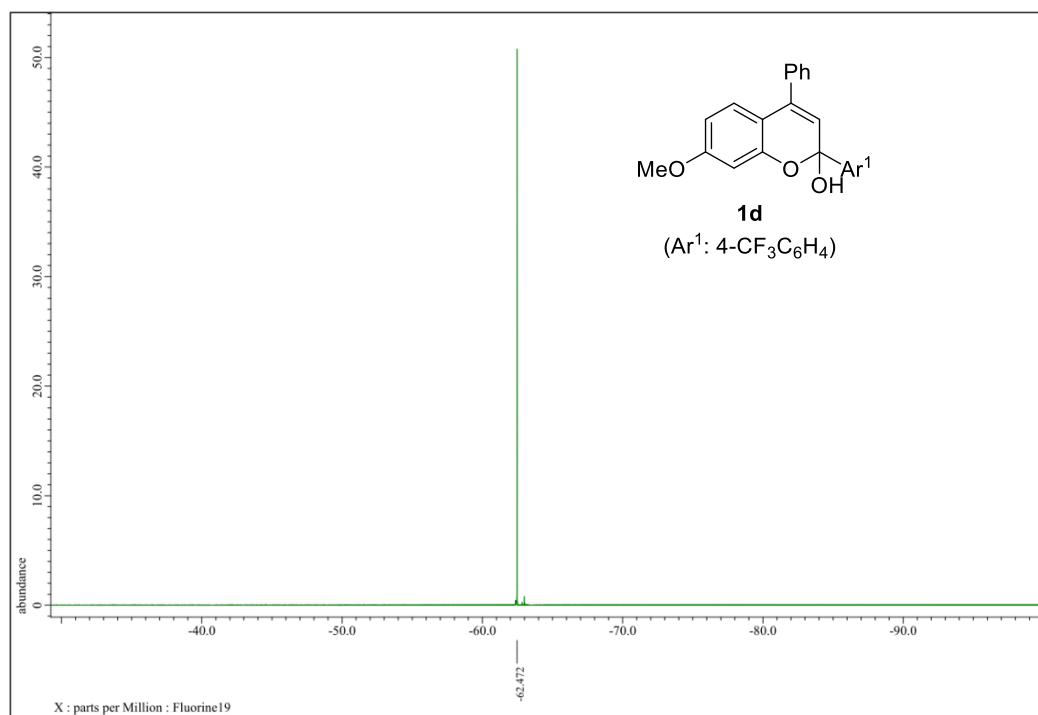

$^1\text{H}$  NMR (600 MHz,  $\text{CDCl}_3$ ) and  $^{13}\text{C}$  NMR (151 MHz,  $\text{CDCl}_3$ ) spectra of **1e**

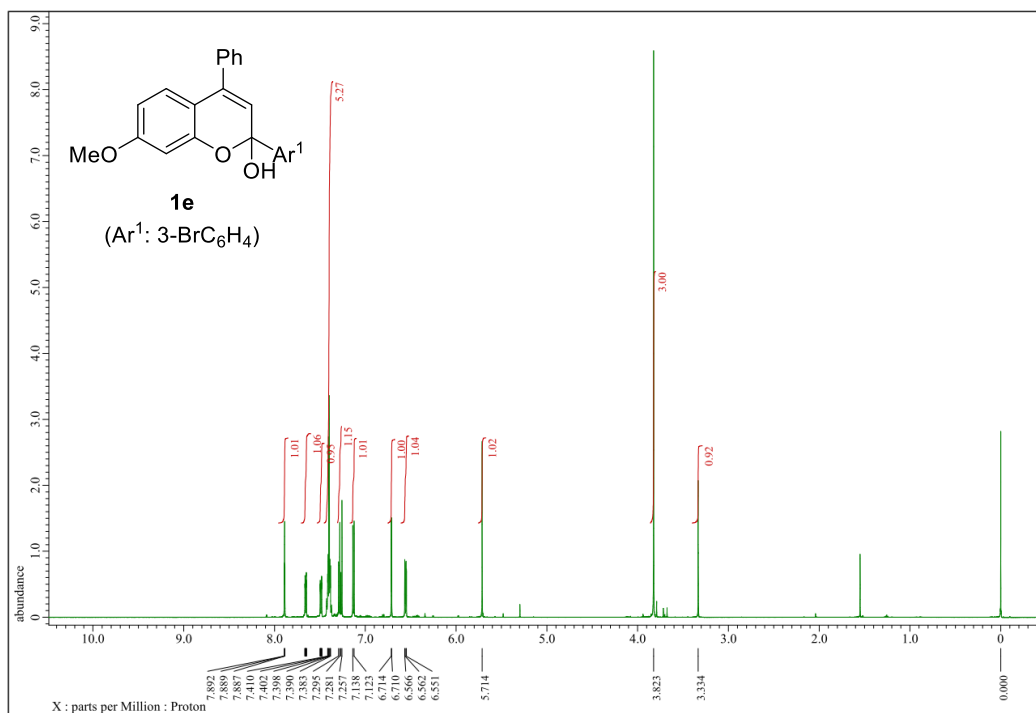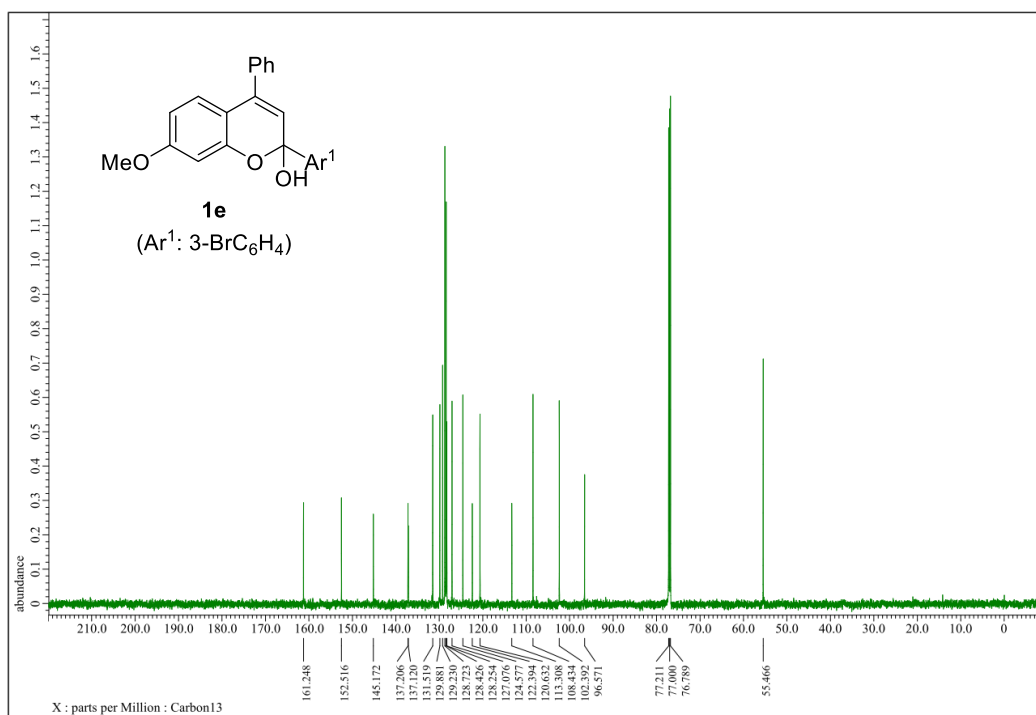



$^1\text{H}$  NMR (600 MHz,  $\text{C}_6\text{D}_6$ ) and  $^{13}\text{C}$  NMR (151 MHz,  $\text{CDCl}_3$ ) spectra of **1f**

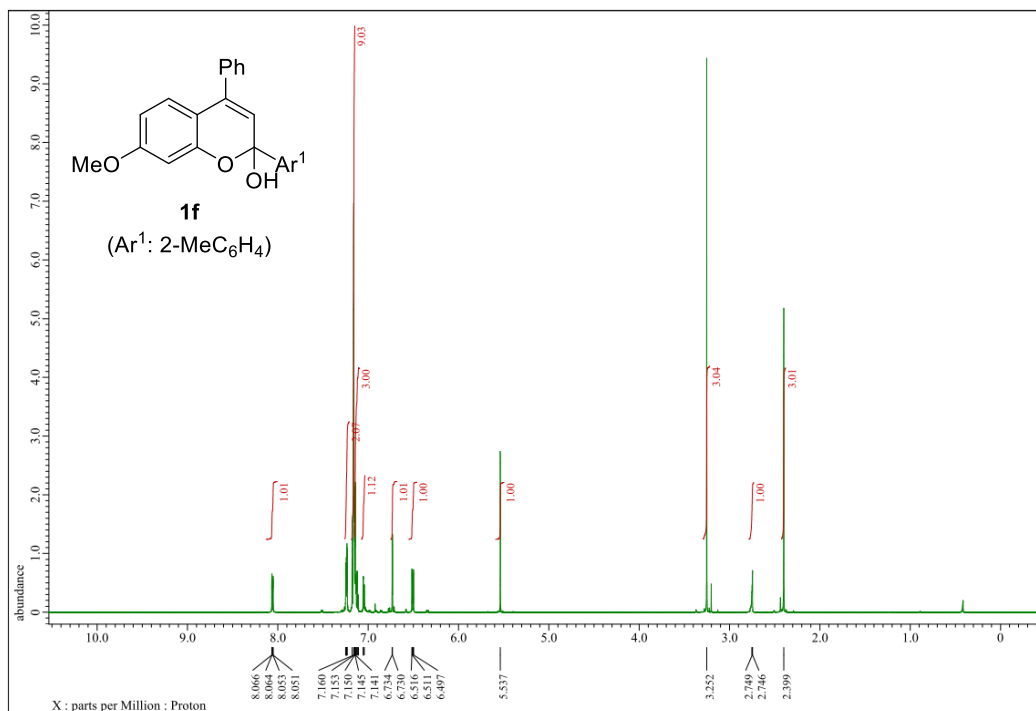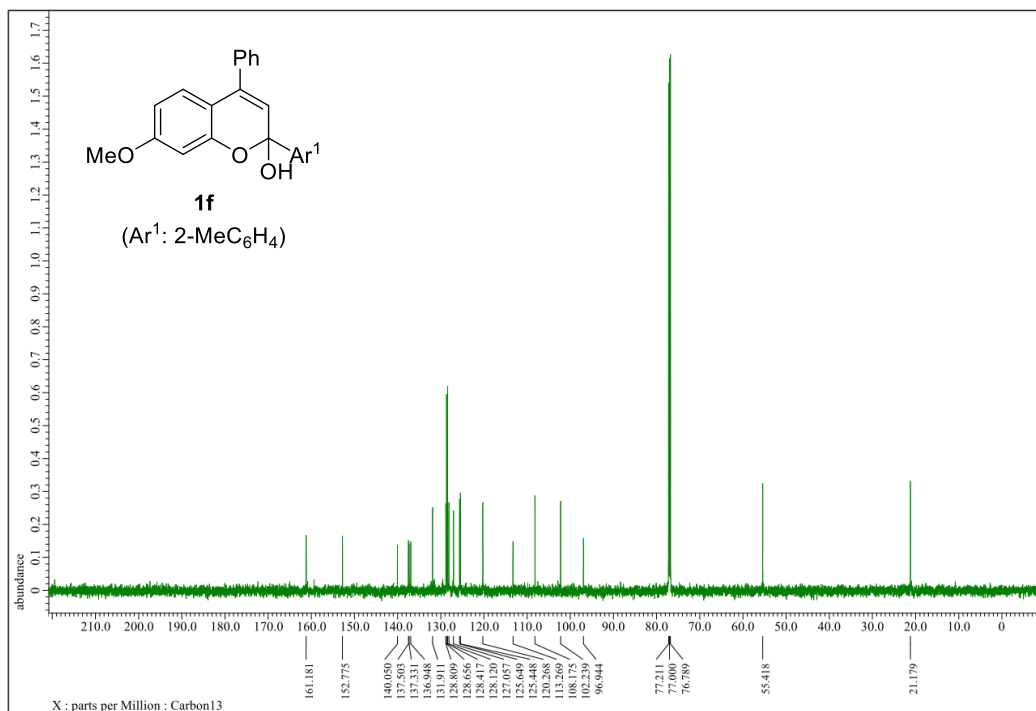

<sup>1</sup>H NMR (600 MHz, C<sub>6</sub>D<sub>6</sub>) and <sup>13</sup>C NMR (151 MHz, C<sub>6</sub>D<sub>6</sub>) spectra of **1g**

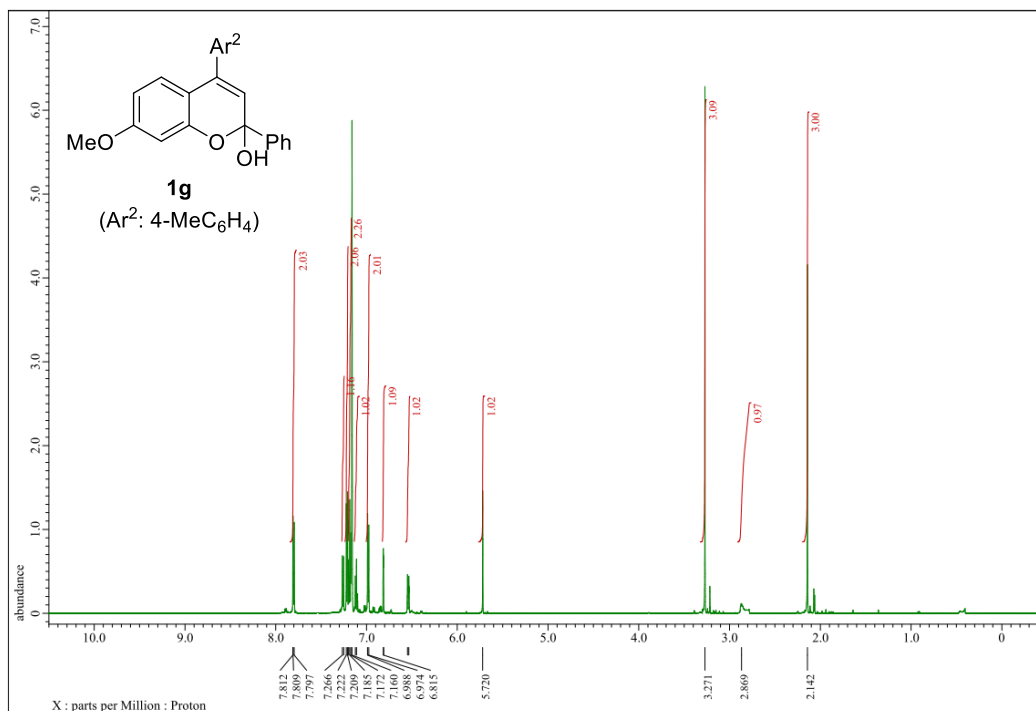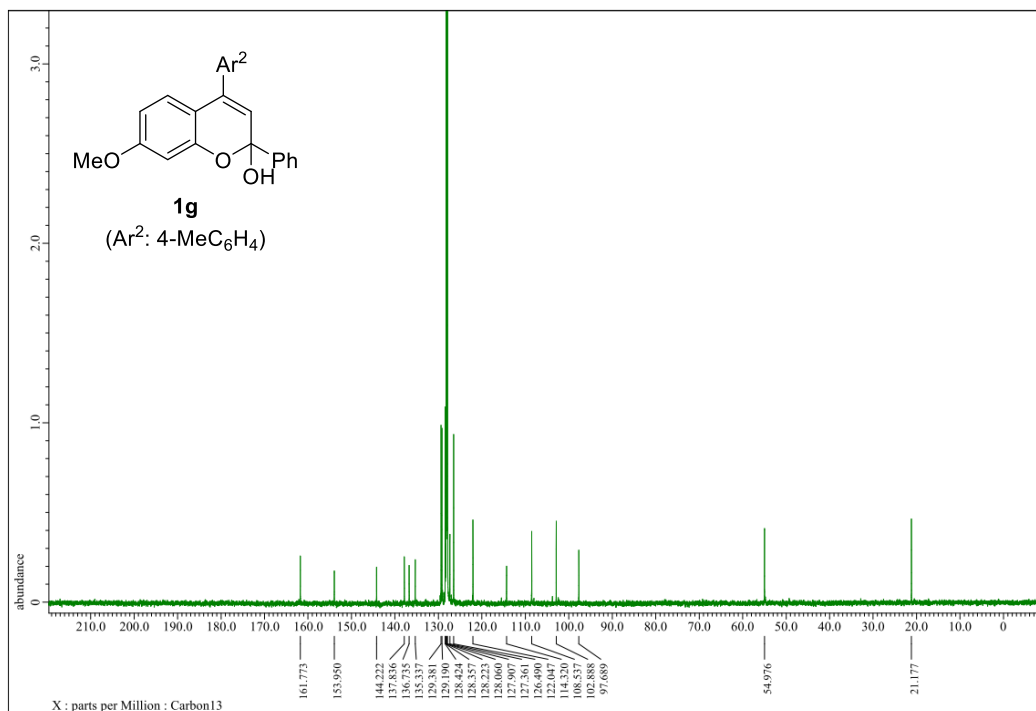

$^1\text{H}$  NMR (600 MHz,  $\text{C}_6\text{D}_6$ ) and  $^{13}\text{C}$  NMR (151 MHz,  $\text{CDCl}_3$ ) spectra of **1h**

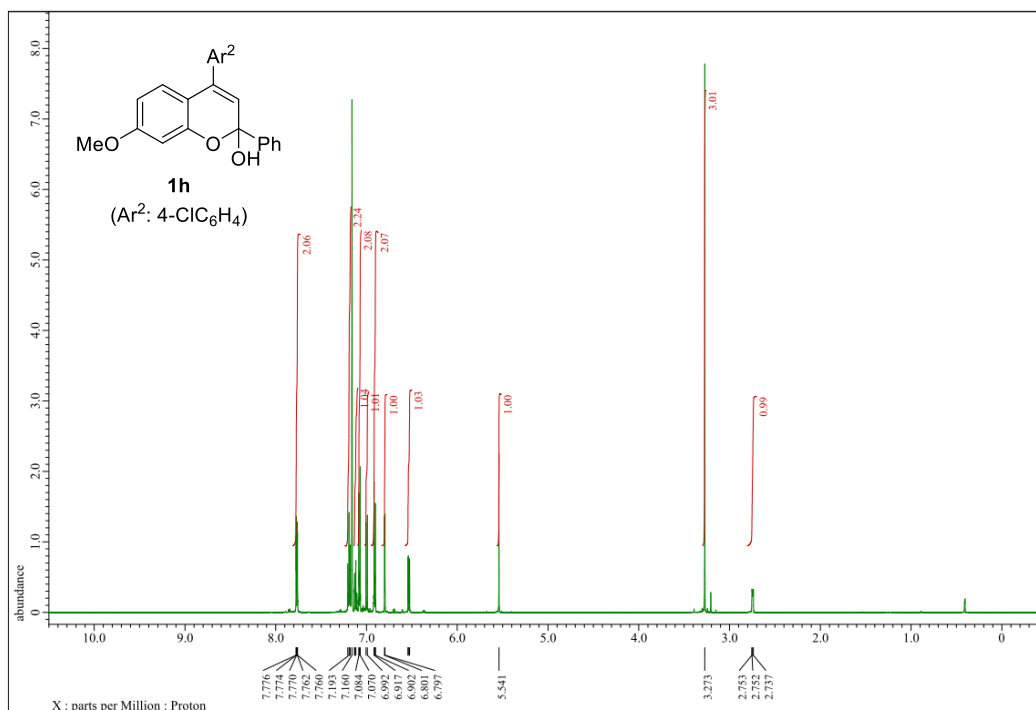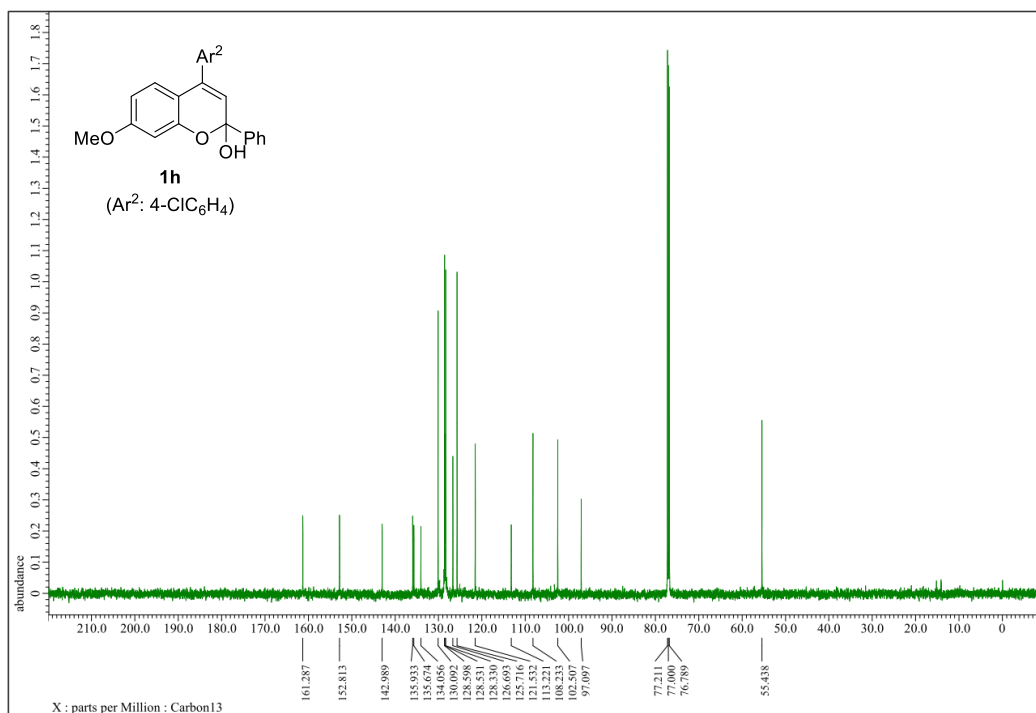

<sup>1</sup>H NMR (600 MHz, C<sub>6</sub>D<sub>6</sub>) and <sup>13</sup>C NMR (151 MHz, C<sub>6</sub>D<sub>6</sub>) spectra of **1i**

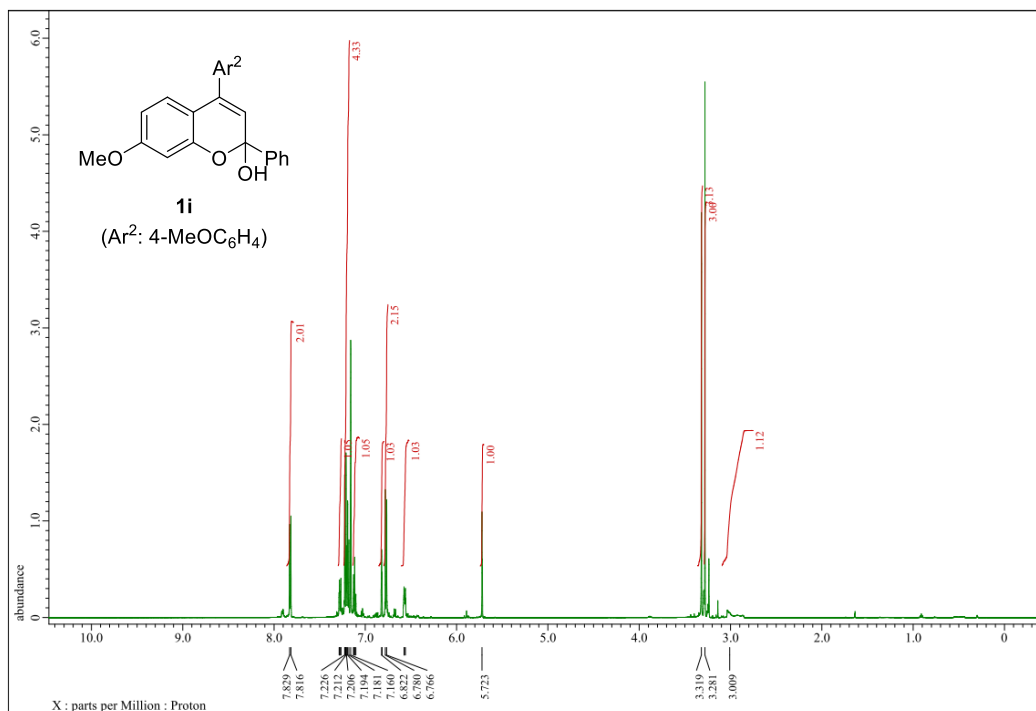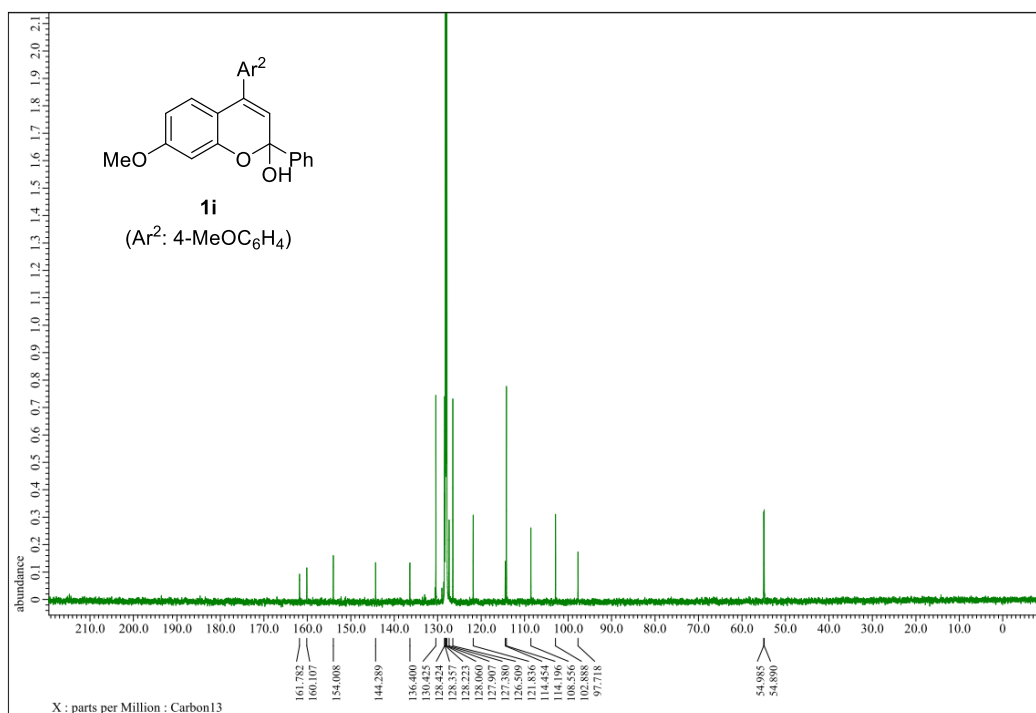

$^1\text{H}$  NMR (600 MHz,  $\text{CDCl}_3$ ) and  $^{13}\text{C}$  NMR (151 MHz,  $\text{CDCl}_3$ ) spectra of **1j**

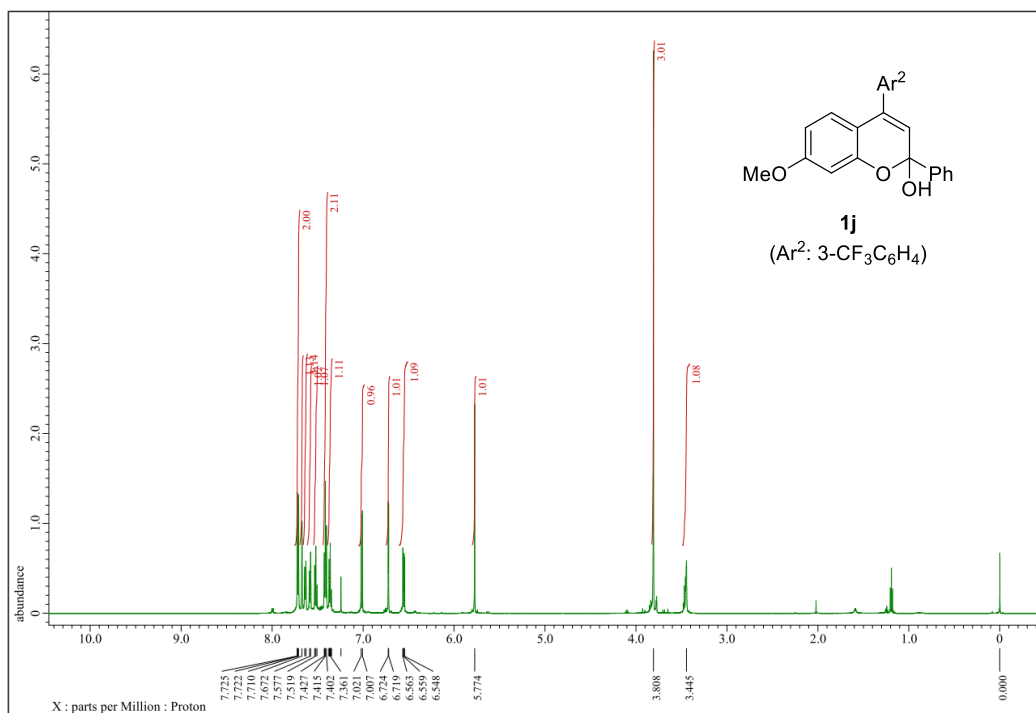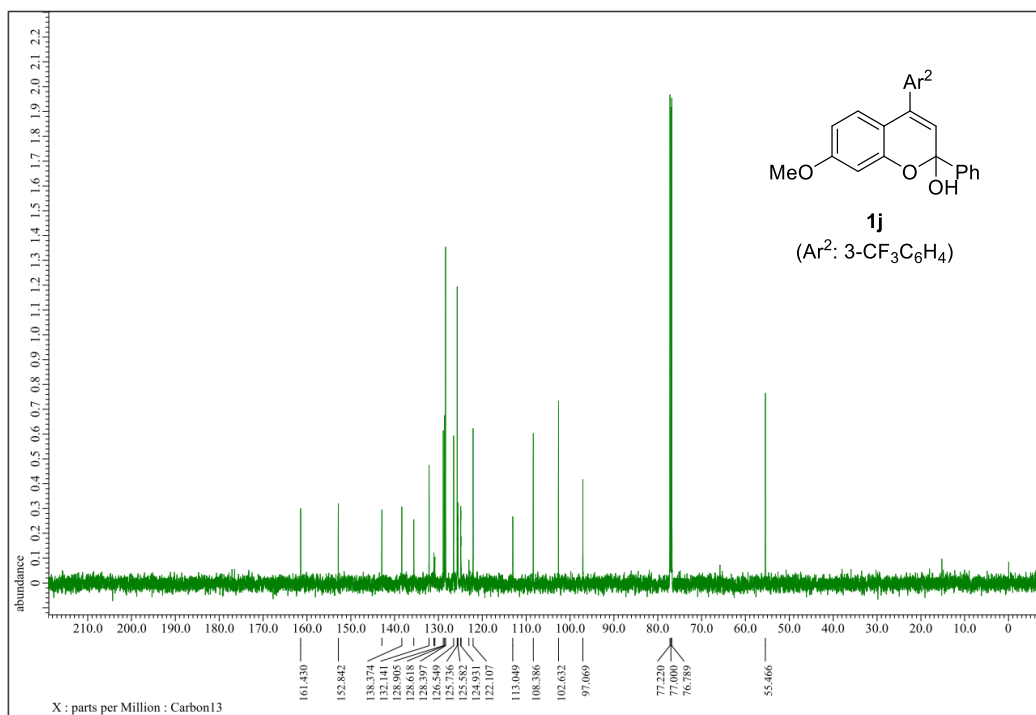

$^{19}\text{F}$  NMR (565 MHz,  $\text{CDCl}_3$ ) spectra of **1j**

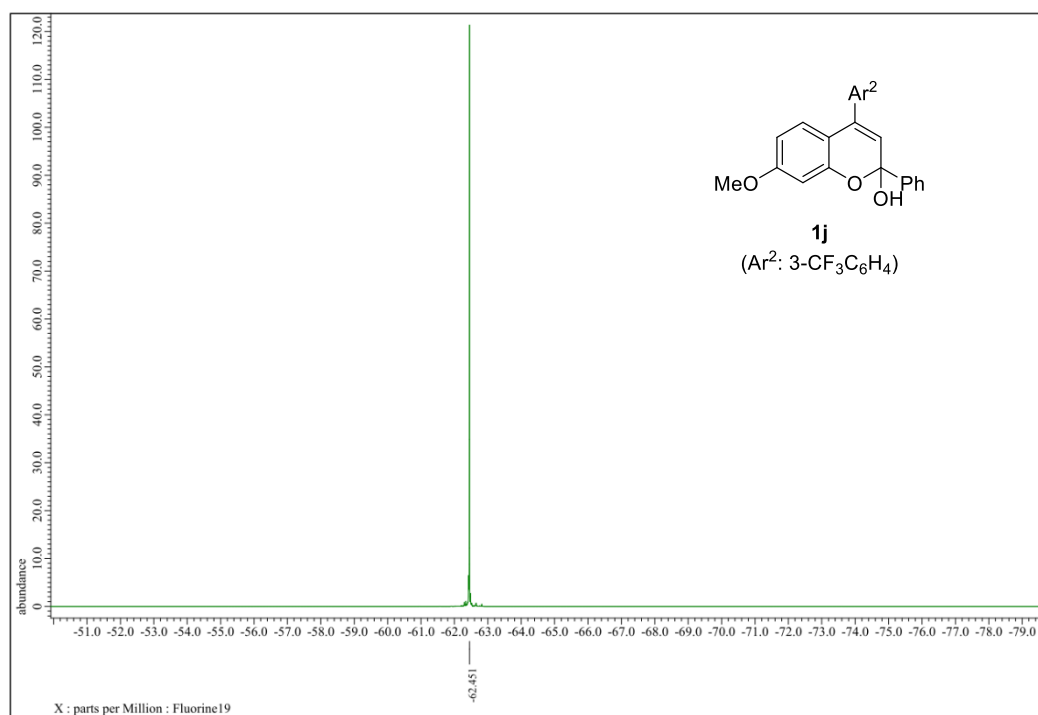

$^1\text{H}$  NMR (600 MHz,  $\text{C}_6\text{D}_6$ ) and  $^{13}\text{C}$  NMR (151 MHz,  $\text{CDCl}_3$ ) spectra of **1k**

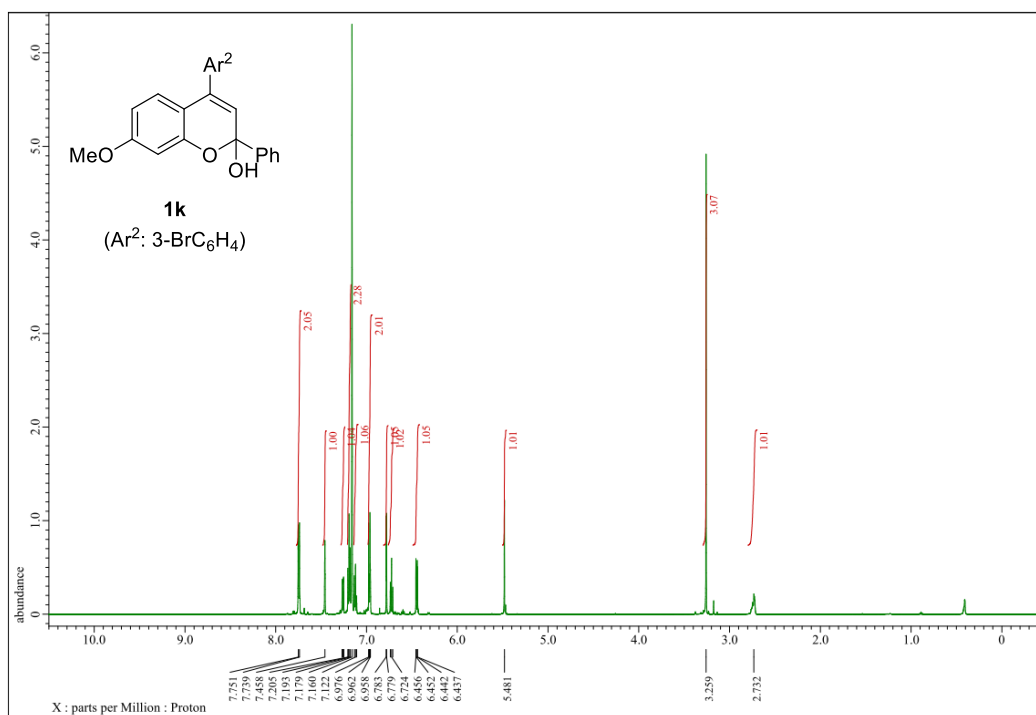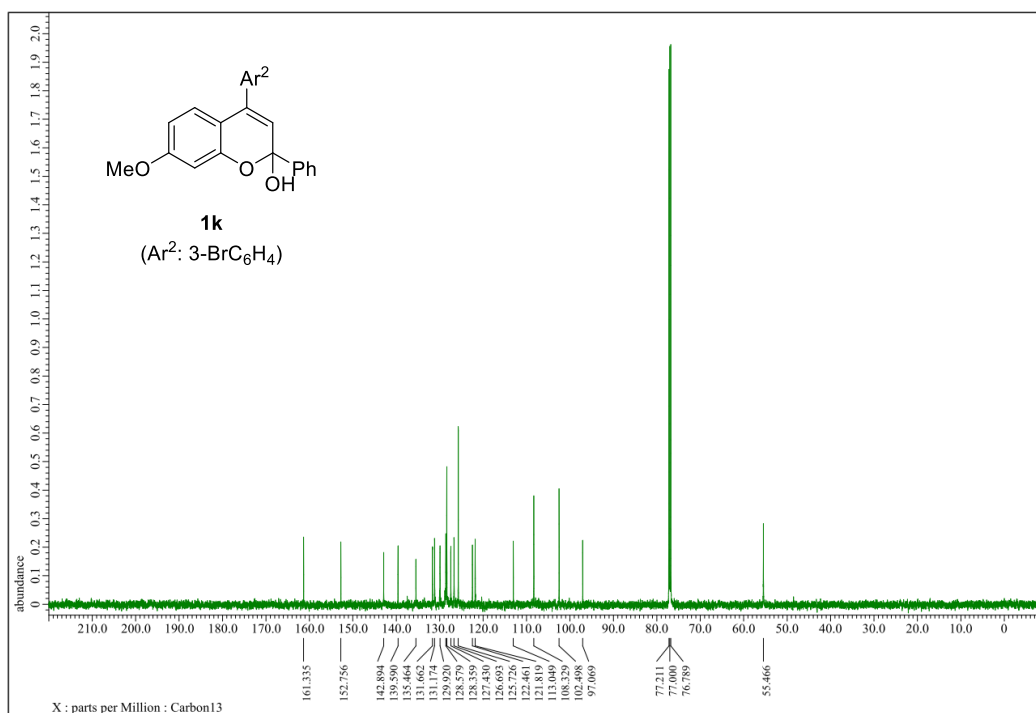

<sup>1</sup>H NMR (600 MHz, CDCl<sub>3</sub>) and <sup>13</sup>C NMR (151 MHz, CDCl<sub>3</sub>) spectra of **11**

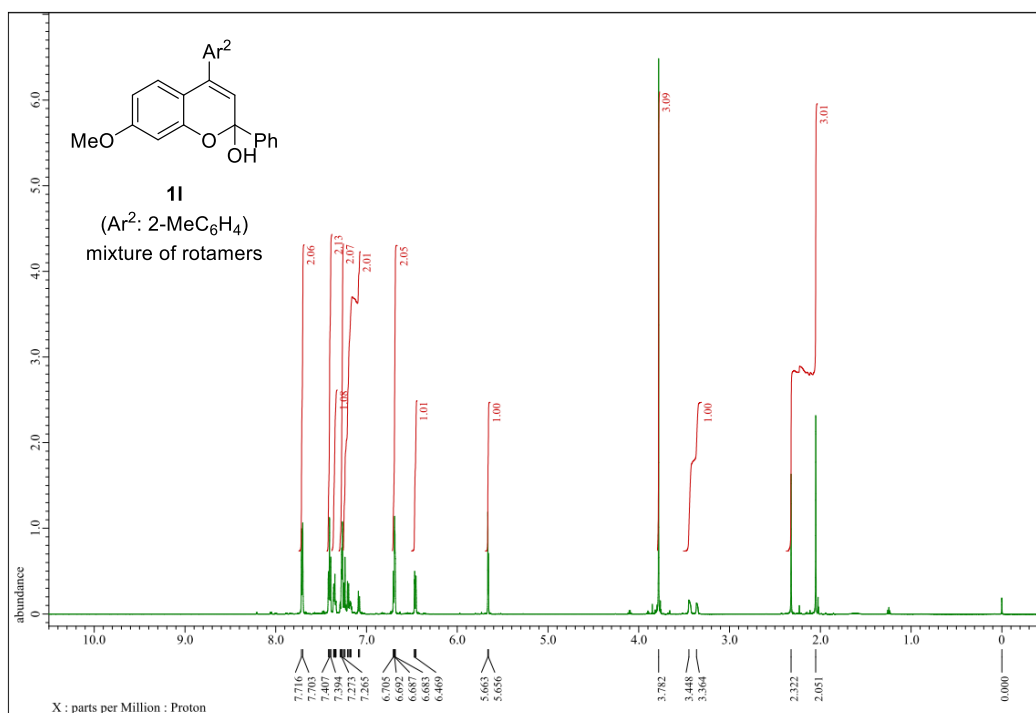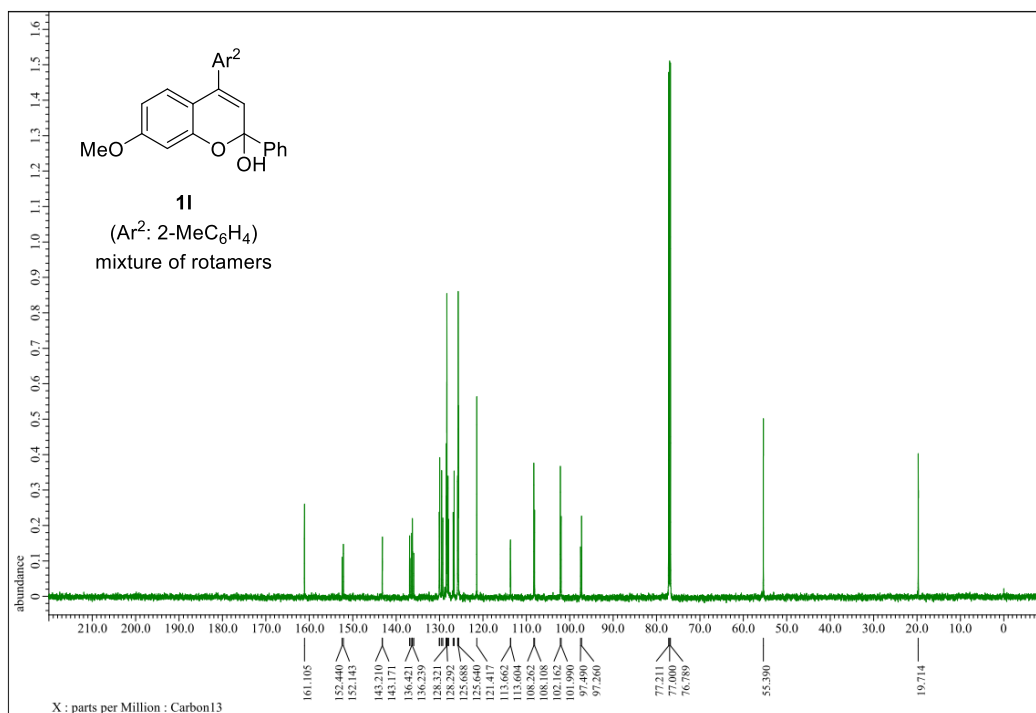



$^1\text{H}$  NMR (600 MHz,  $\text{CDCl}_3$ ) and  $^{13}\text{C}$  NMR (151 MHz,  $\text{CDCl}_3$ ) spectra of **1n**

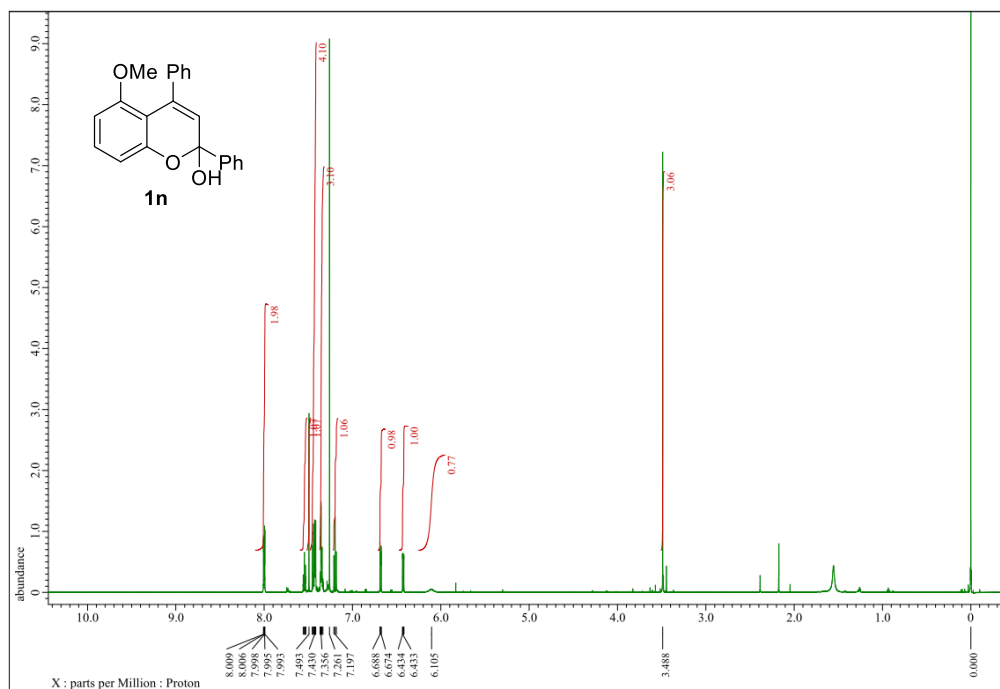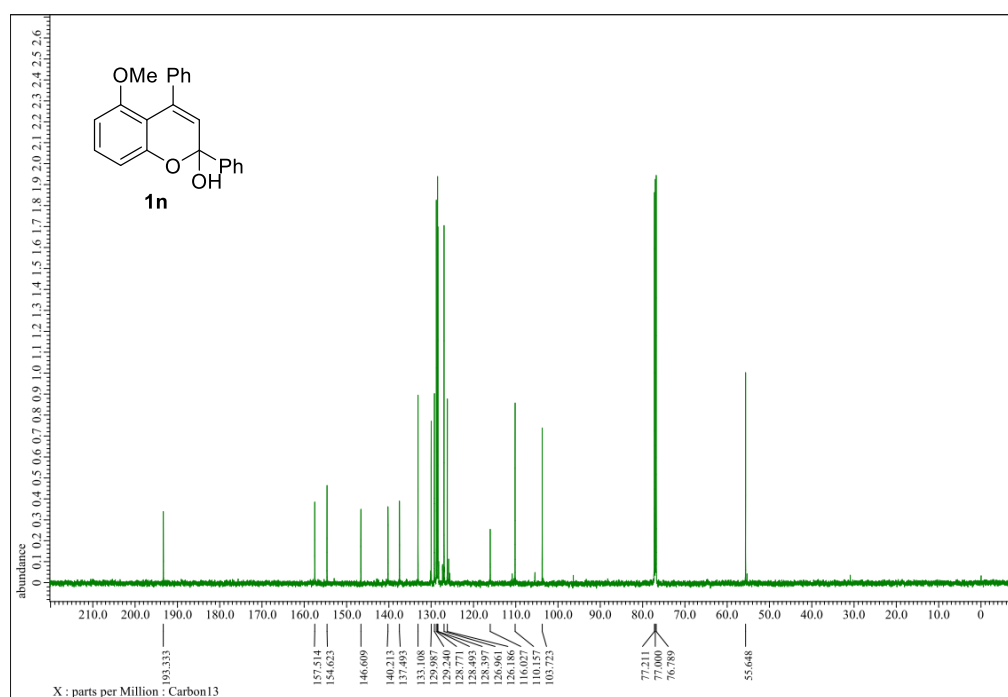

$^1\text{H}$  NMR (600 MHz,  $\text{C}_6\text{D}_6$ ) and  $^{13}\text{C}$  NMR (151 MHz,  $\text{C}_6\text{D}_6$ ) spectra of **1o**

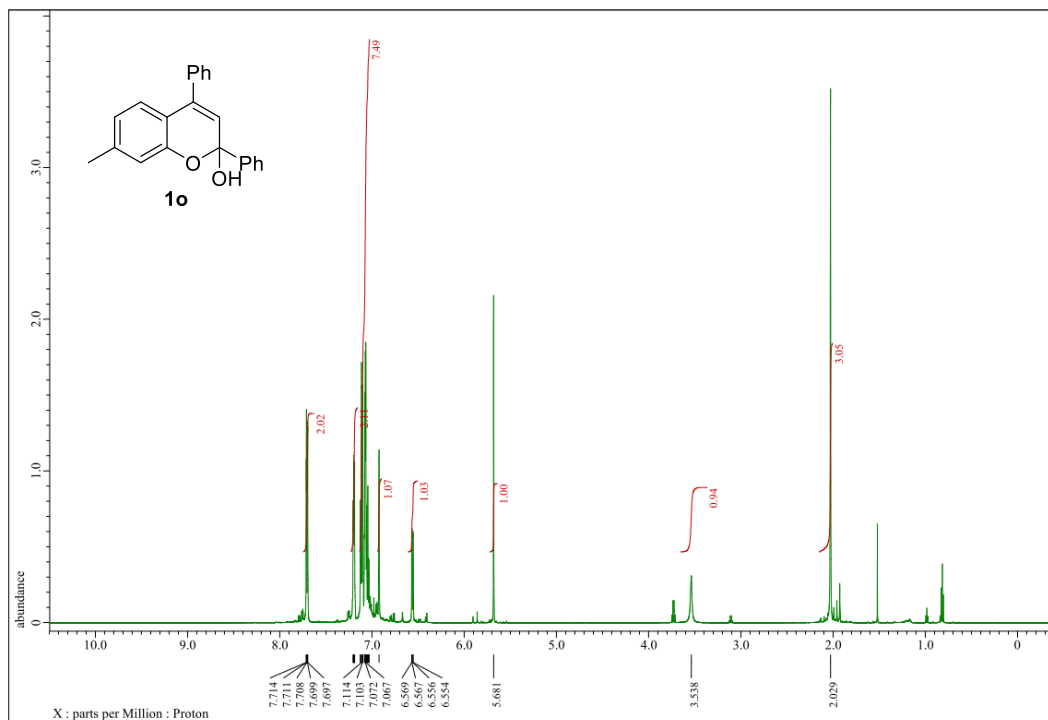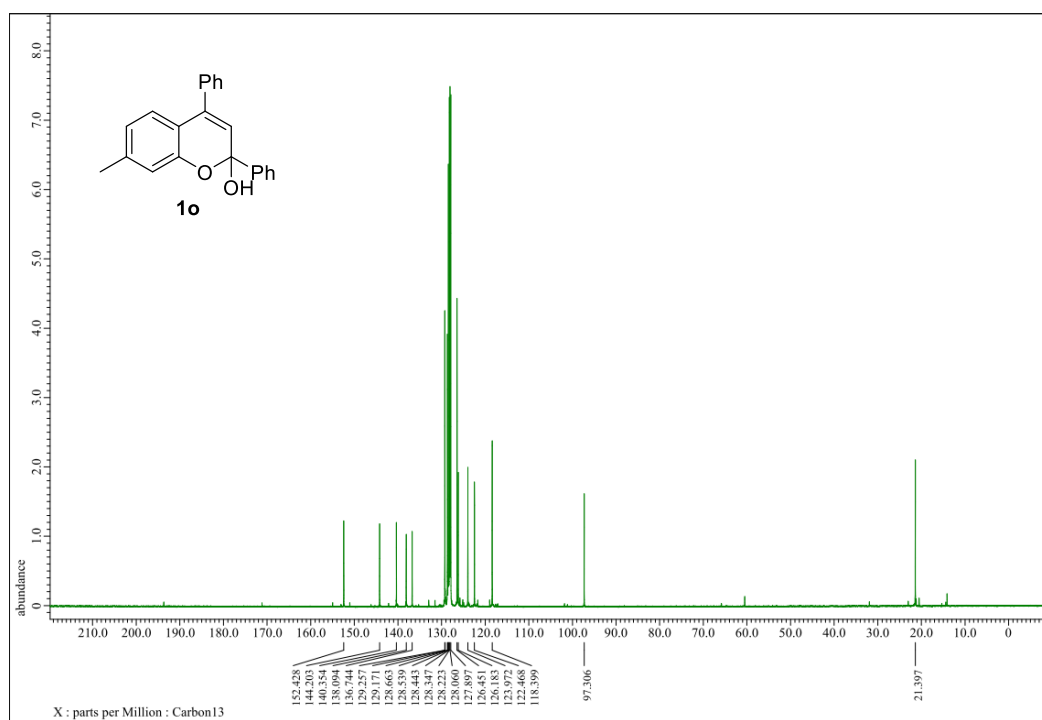

$^1\text{H}$  NMR (600 MHz,  $\text{C}_6\text{D}_6$ ) and  $^{13}\text{C}$  NMR (151 MHz,  $\text{C}_6\text{D}_6$ ) spectra of **1p**

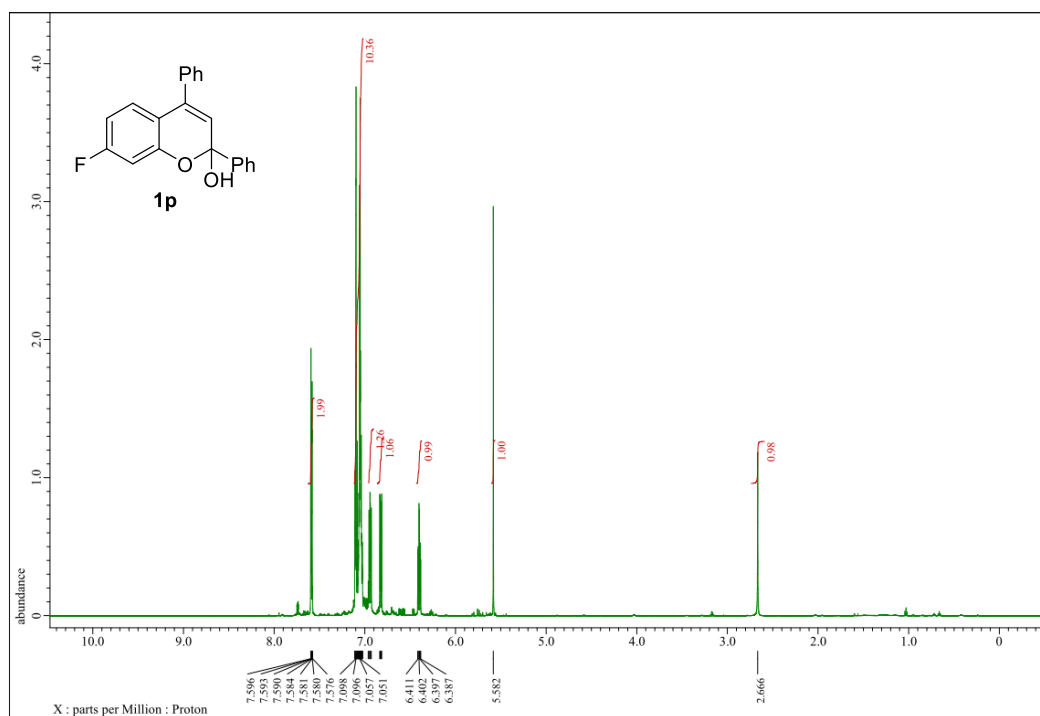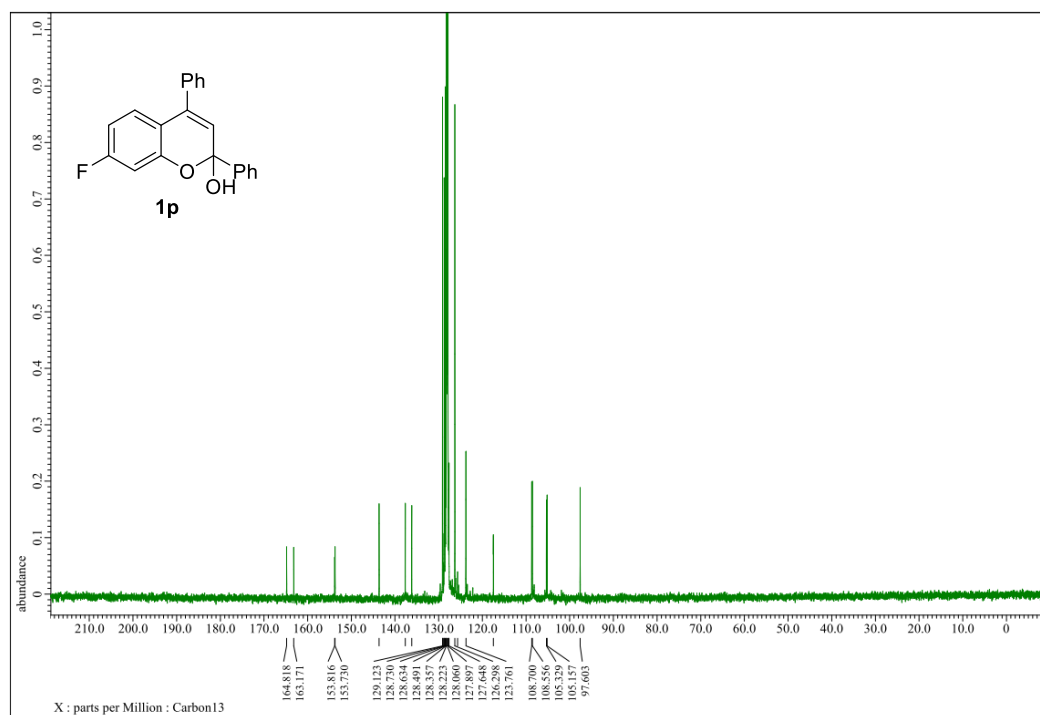

$^{19}\text{F}$  NMR (565 MHz,  $\text{CDCl}_3$ ) spectra of **1p**

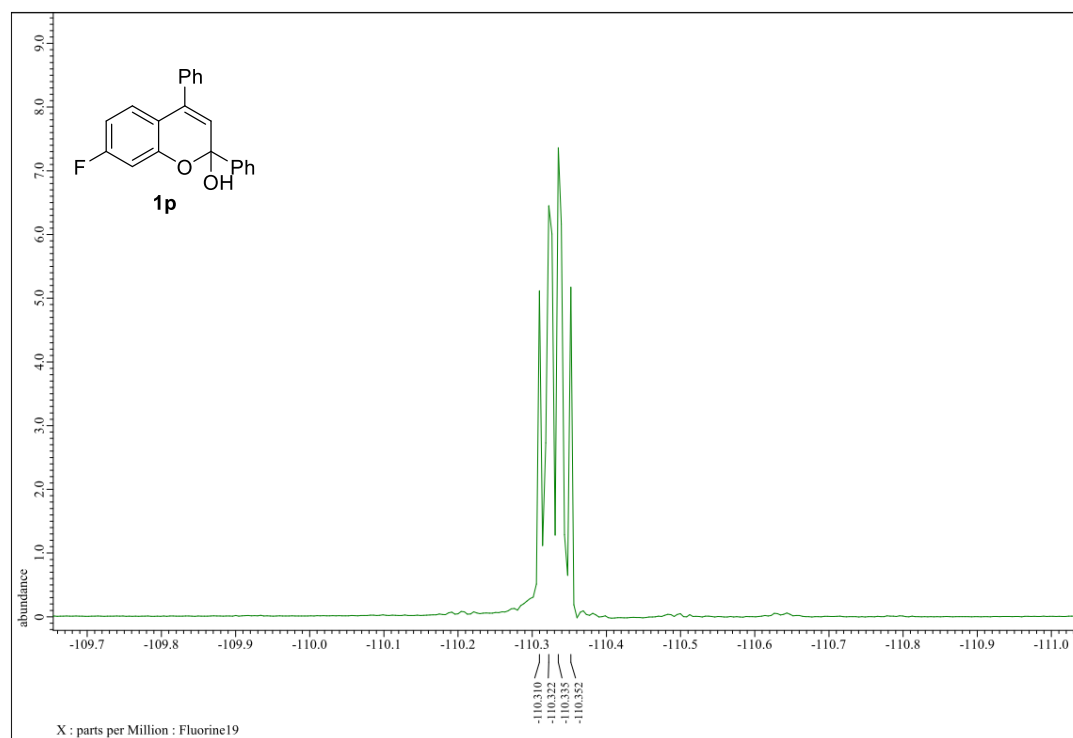

$^1\text{H}$  NMR (600 MHz,  $\text{CDCl}_3$ ) and  $^{13}\text{C}$  NMR (151 MHz,  $\text{CDCl}_3$ ) spectra of **S4**

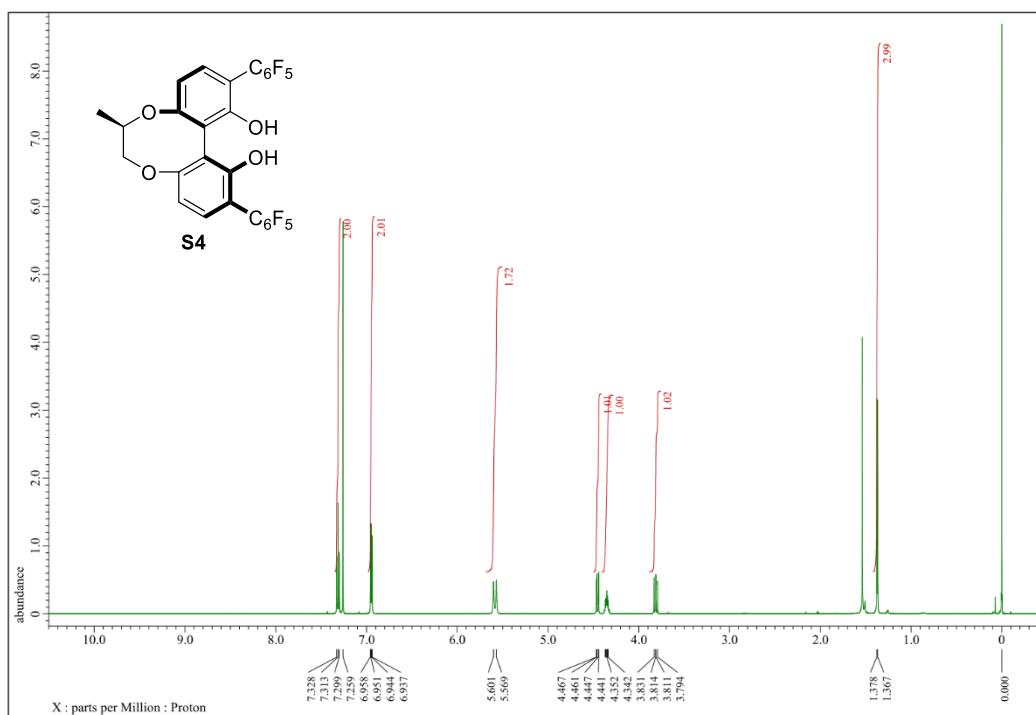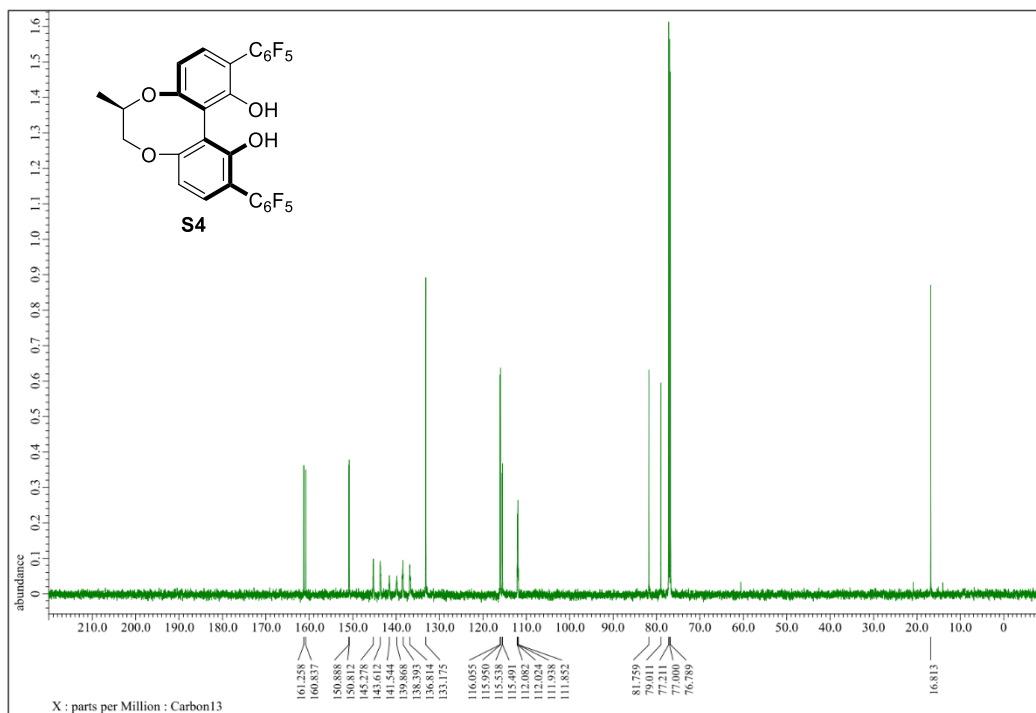

$^{19}\text{F}$  NMR (565 MHz,  $\text{CDCl}_3$ ) spectra of S4

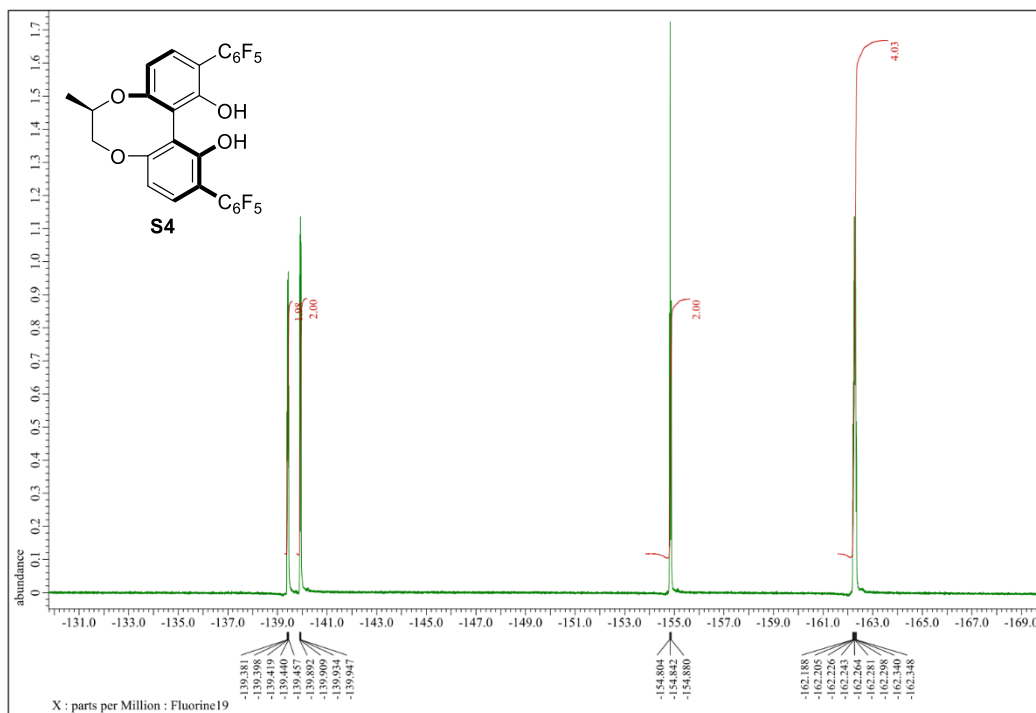

$^1\text{H}$  NMR (600 MHz,  $\text{CDCl}_3$ ) and  $^{13}\text{C}$  NMR (151 MHz,  $\text{CDCl}_3$ ) spectra of (S)-4

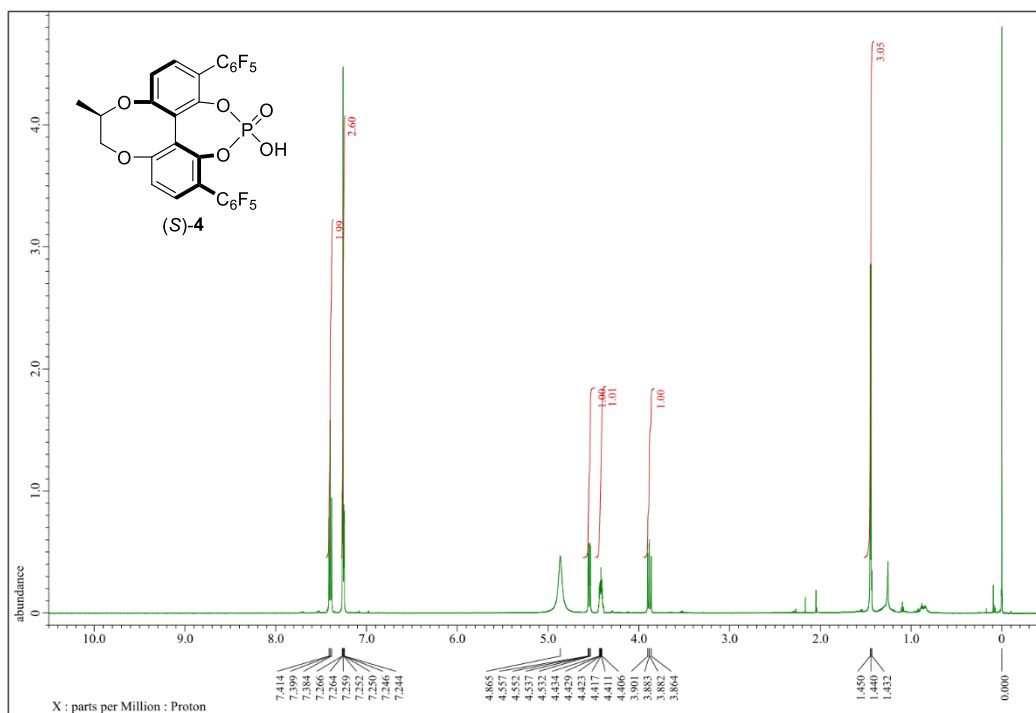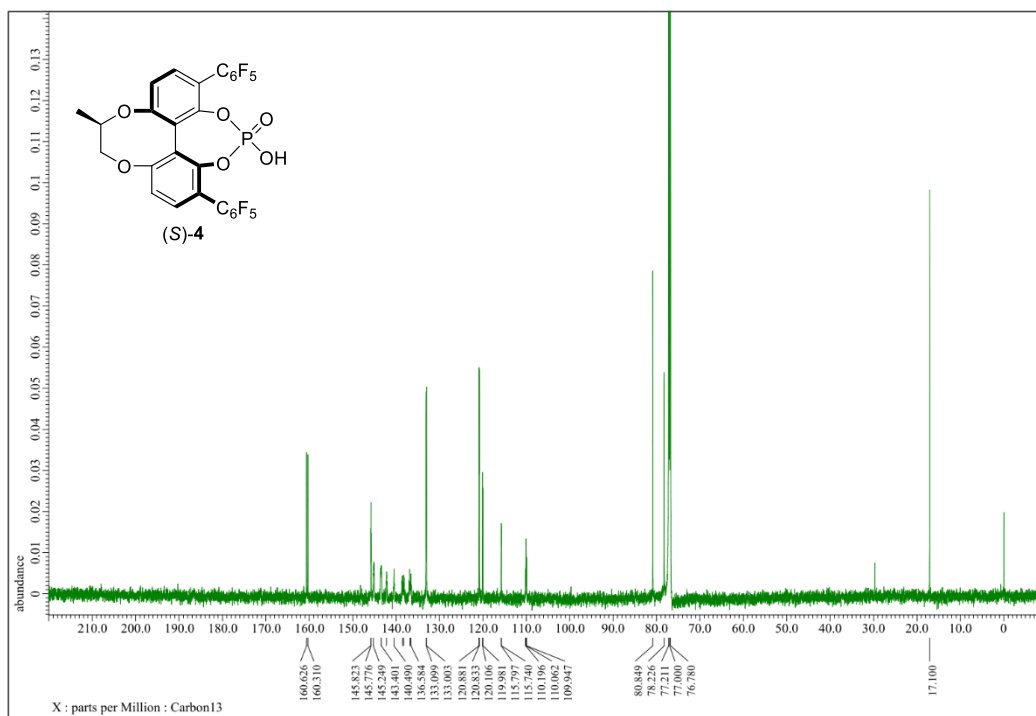

$^{31}\text{P}$  NMR (243 MHz,  $\text{CDCl}_3$ ) and  $^{19}\text{F}$  NMR (565 MHz,  $\text{CDCl}_3$ ) spectra of (S)-4

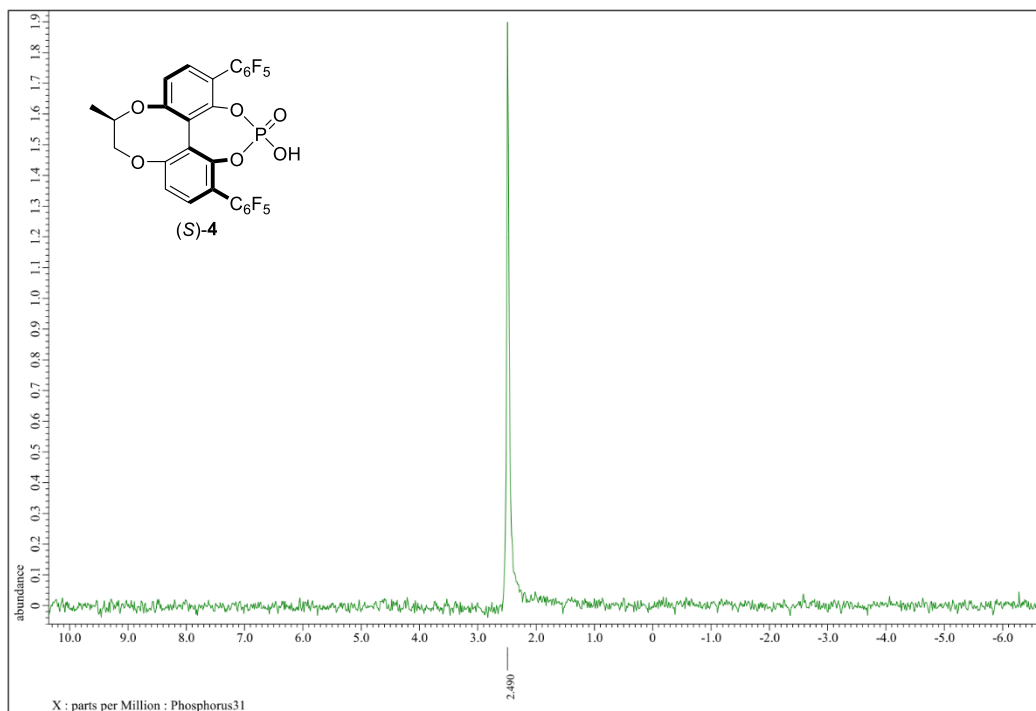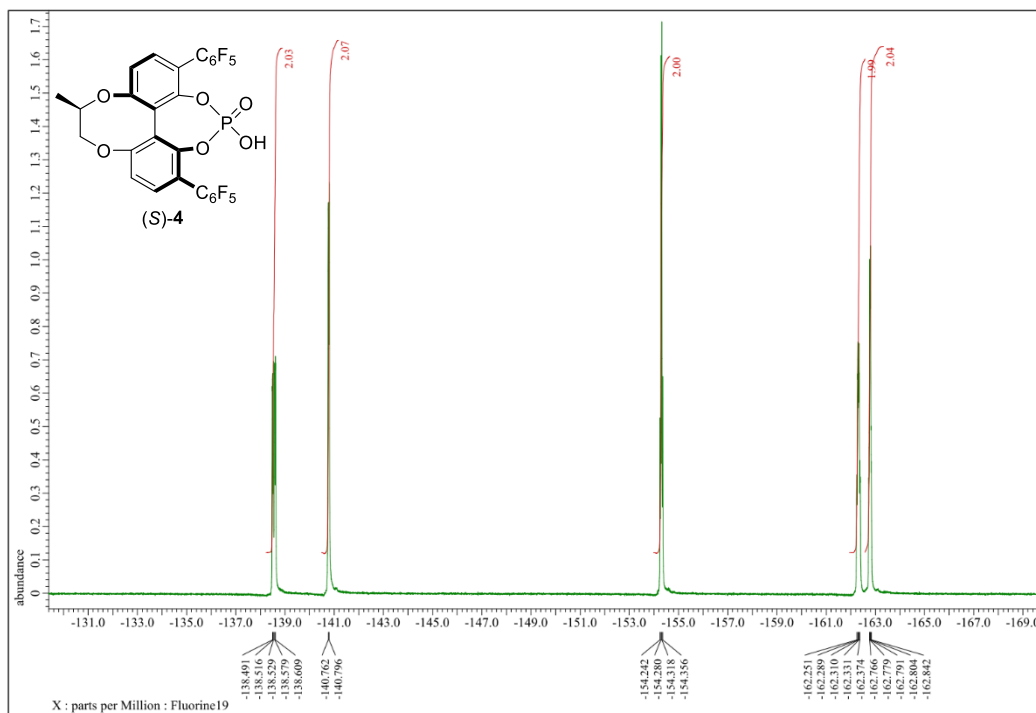



<sup>1</sup>H NMR (600 MHz, CDCl<sub>3</sub>) and <sup>13</sup>C NMR (151 MHz, CDCl<sub>3</sub>) spectra of **3aa**

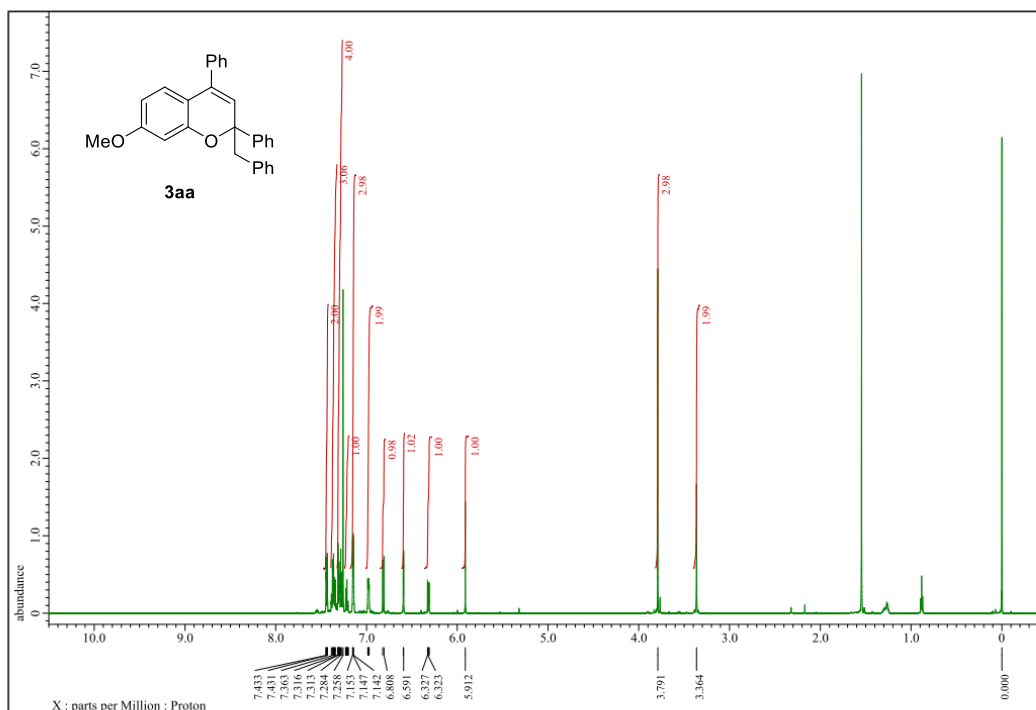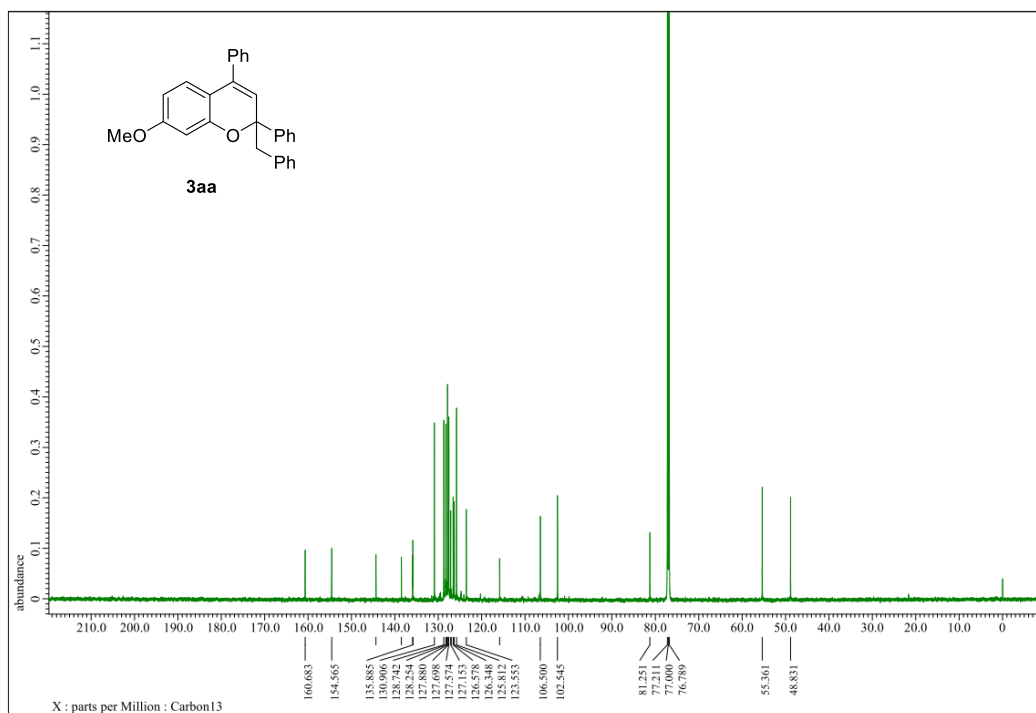

<sup>1</sup>H NMR (600 MHz, CDCl<sub>3</sub>) and <sup>13</sup>C NMR (151 MHz, CDCl<sub>3</sub>) spectra of **3ba**

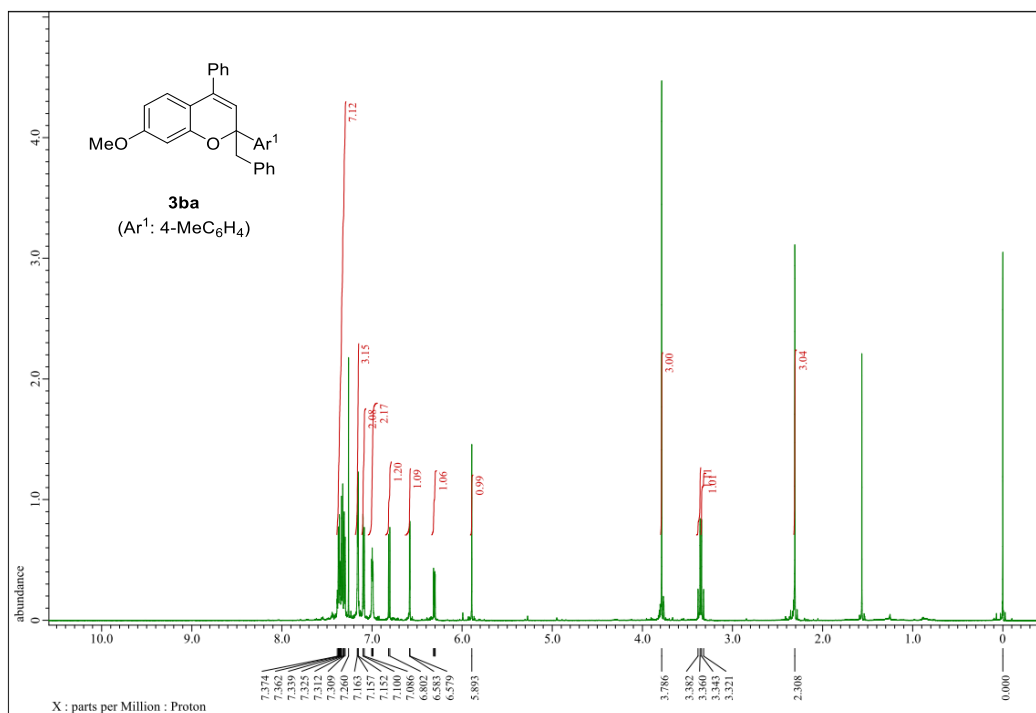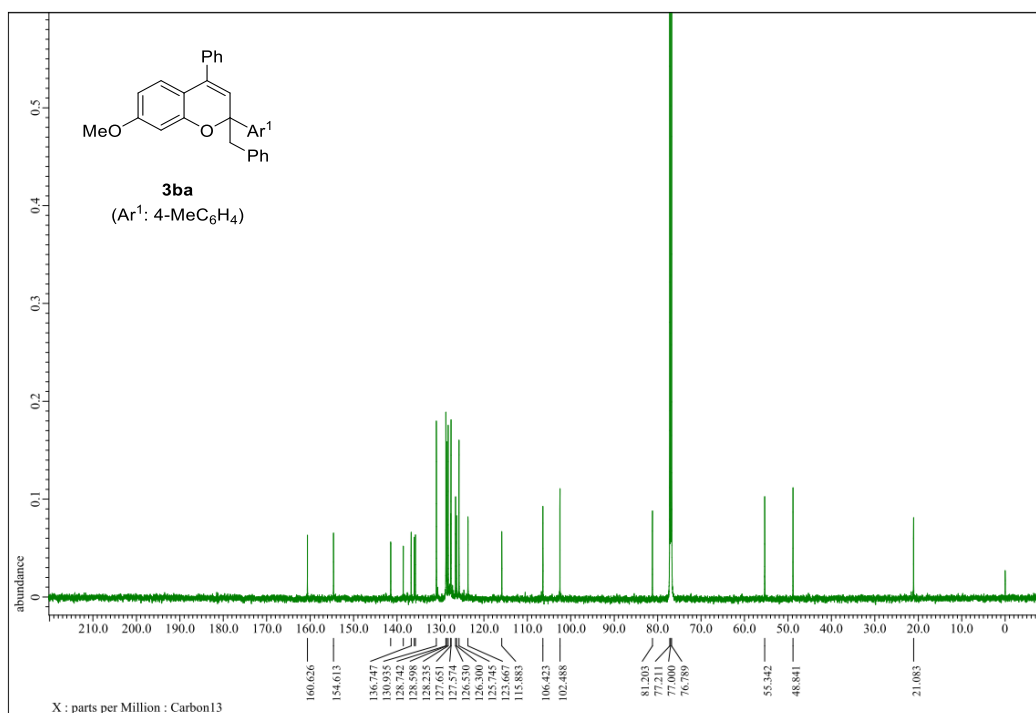

$^1\text{H}$  NMR (600 MHz,  $\text{CDCl}_3$ ) and  $^{13}\text{C}$  NMR (151 MHz,  $\text{CDCl}_3$ ) spectra of **3ca**

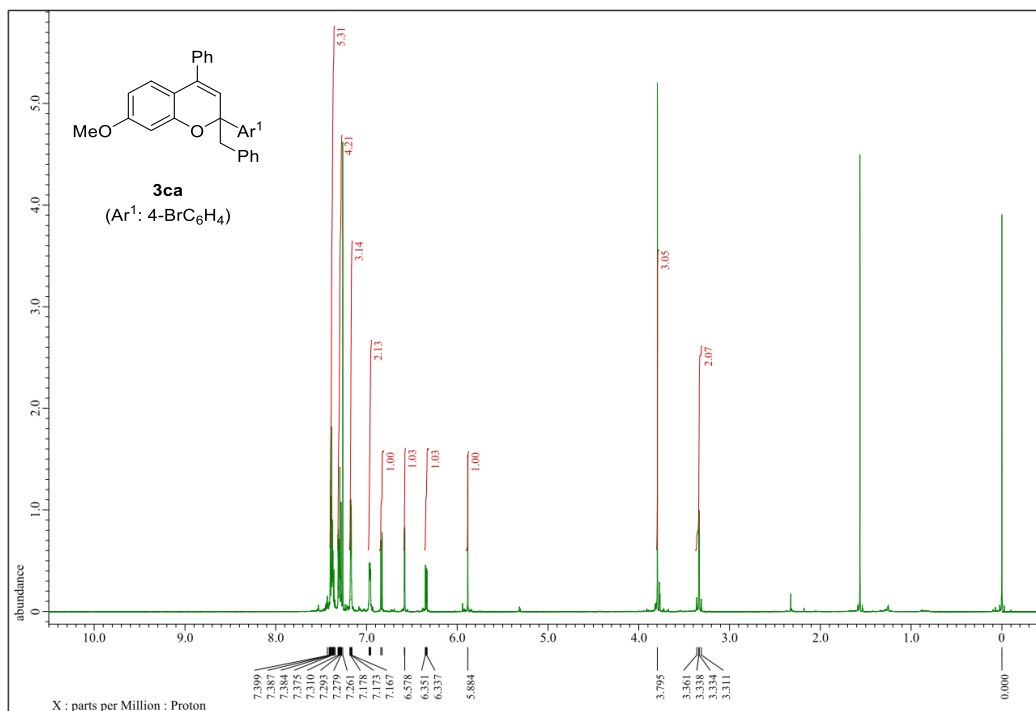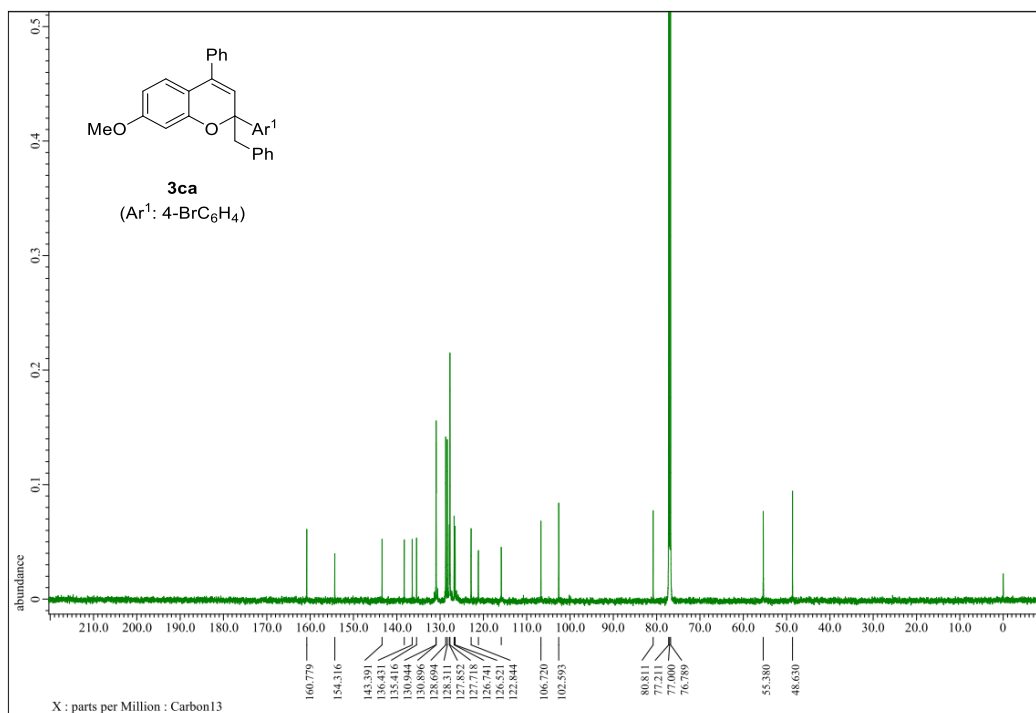

$^1\text{H}$  NMR (600 MHz,  $\text{CDCl}_3$ ) and  $^{13}\text{C}$  NMR (151 MHz,  $\text{CDCl}_3$ ) spectra of **3da**

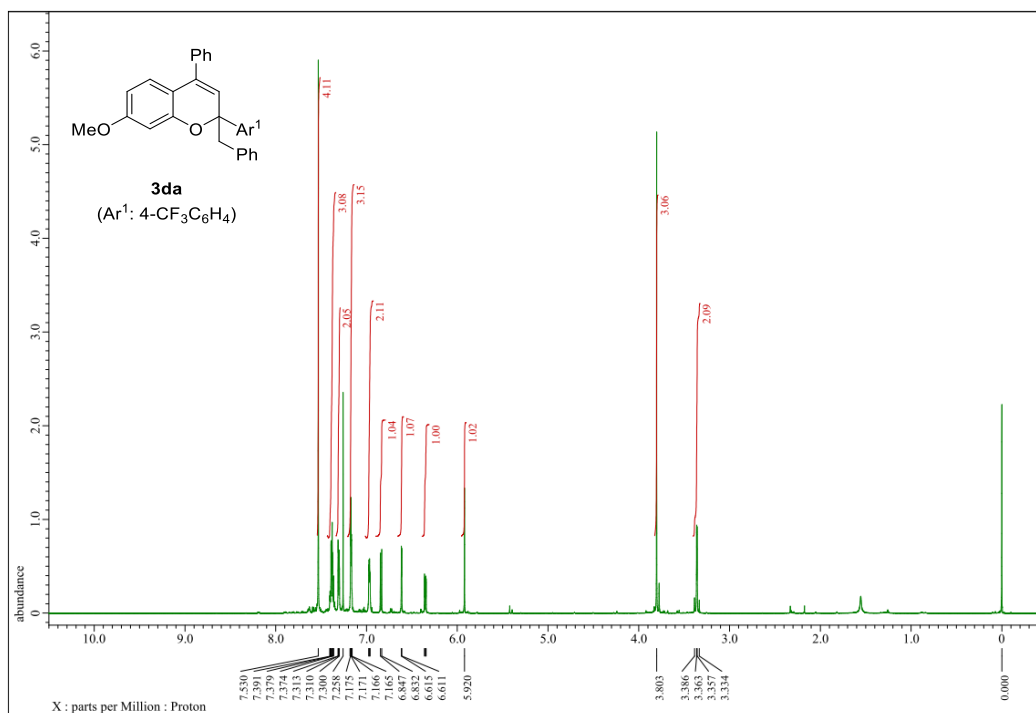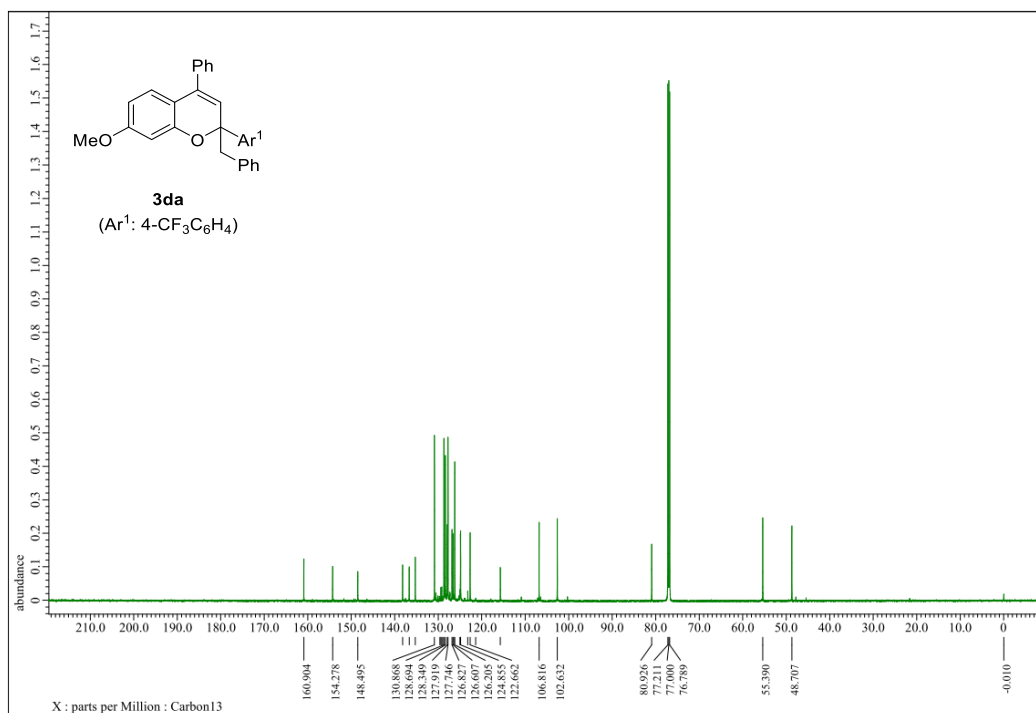

$^{19}\text{F}$  NMR (565 MHz,  $\text{CDCl}_3$ ) spectra of **3da**

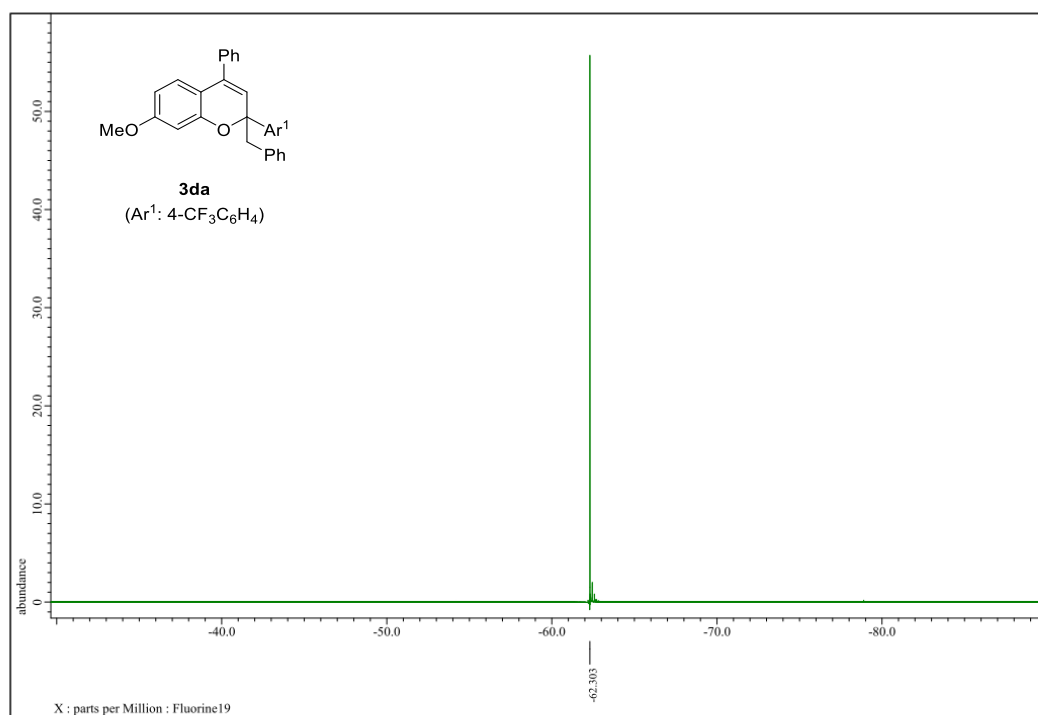

$^1\text{H}$  NMR (600 MHz,  $\text{CDCl}_3$ ) and  $^{13}\text{C}$  NMR (151 MHz,  $\text{CDCl}_3$ ) spectra of **3ea**

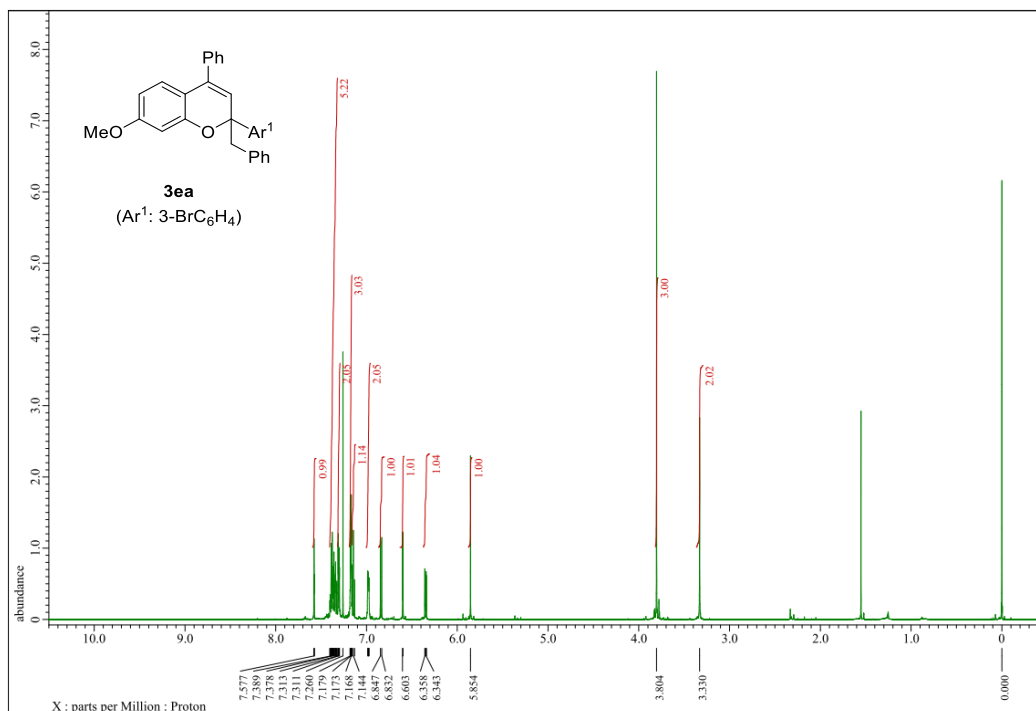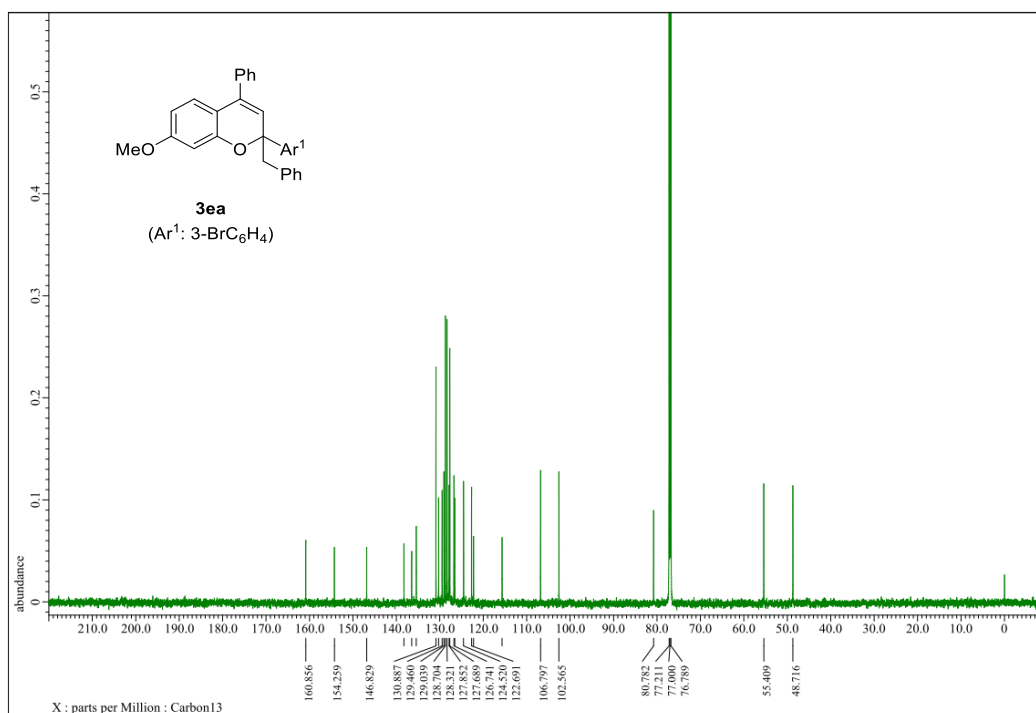

$^1\text{H}$  NMR (600 MHz,  $\text{CDCl}_3$ ) and  $^{13}\text{C}$  NMR (151 MHz,  $\text{CDCl}_3$ ) spectra of **3fa**

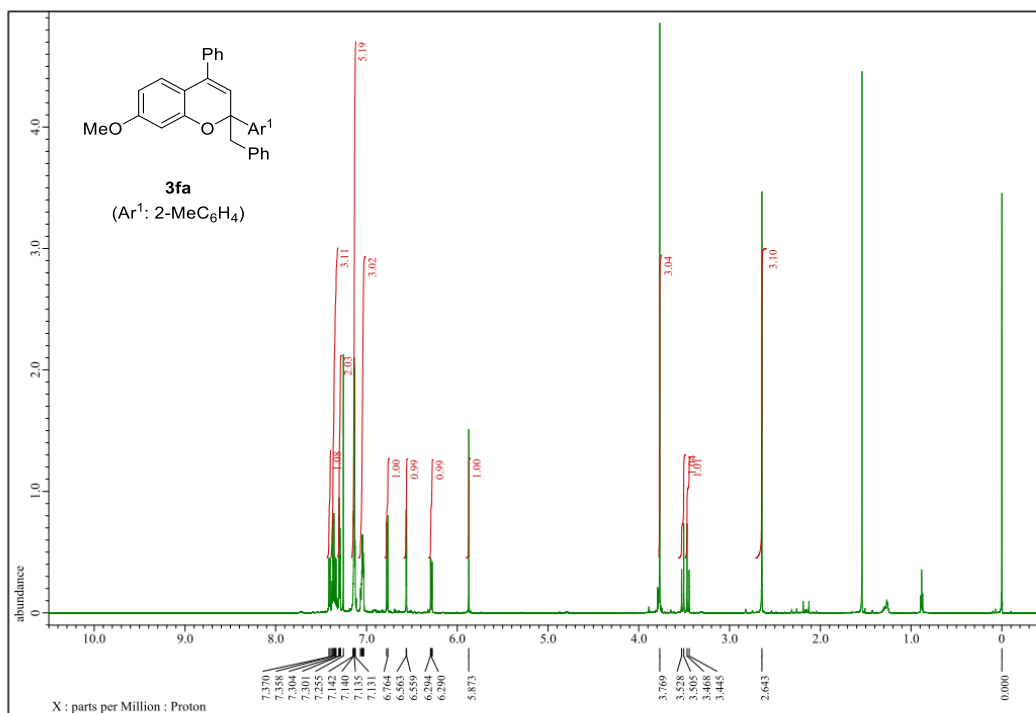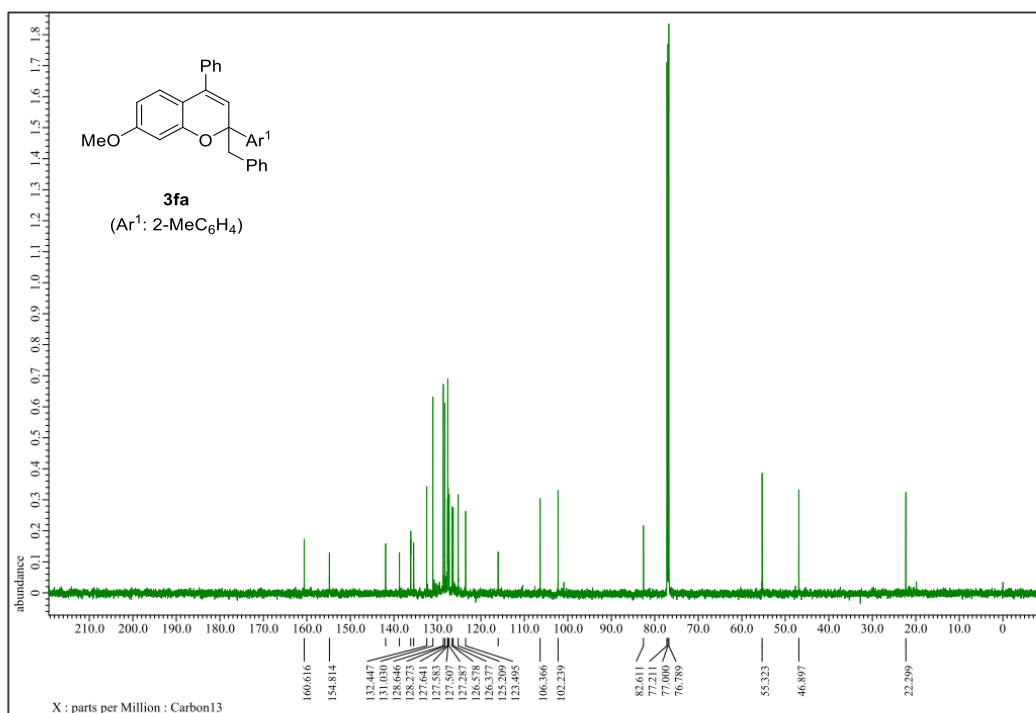

<sup>1</sup>H NMR (600 MHz, CDCl<sub>3</sub>) and <sup>13</sup>C NMR (151 MHz, CDCl<sub>3</sub>) spectra of **3ga**

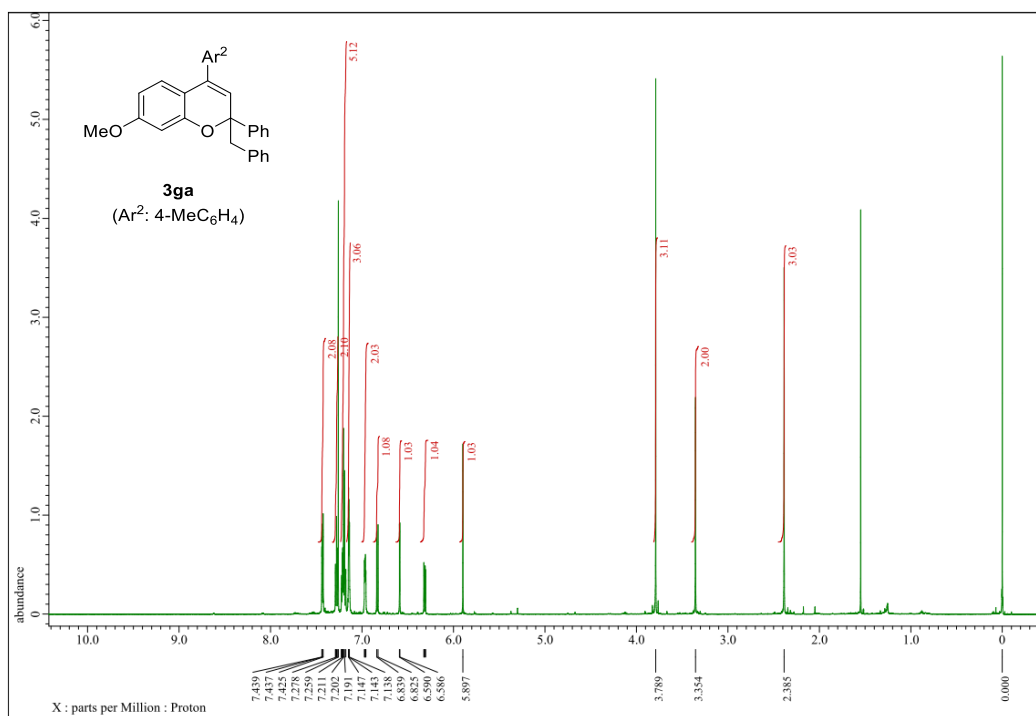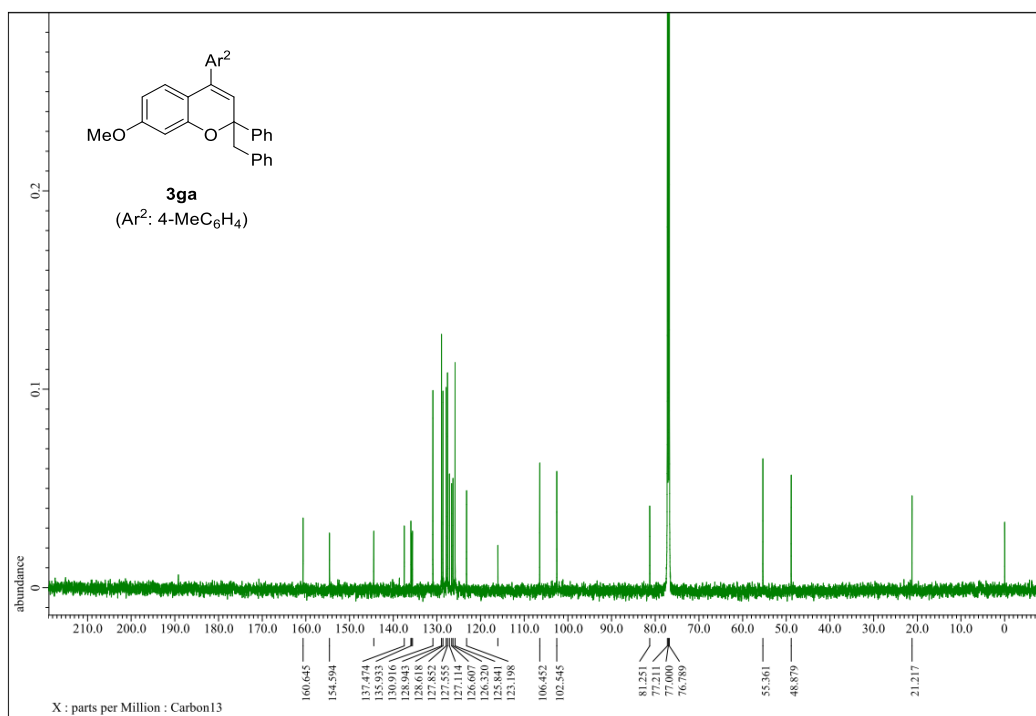



$^1\text{H}$  NMR (600 MHz,  $\text{CDCl}_3$ ) and  $^{13}\text{C}$  NMR (151 MHz,  $\text{CDCl}_3$ ) spectra of **3ha**

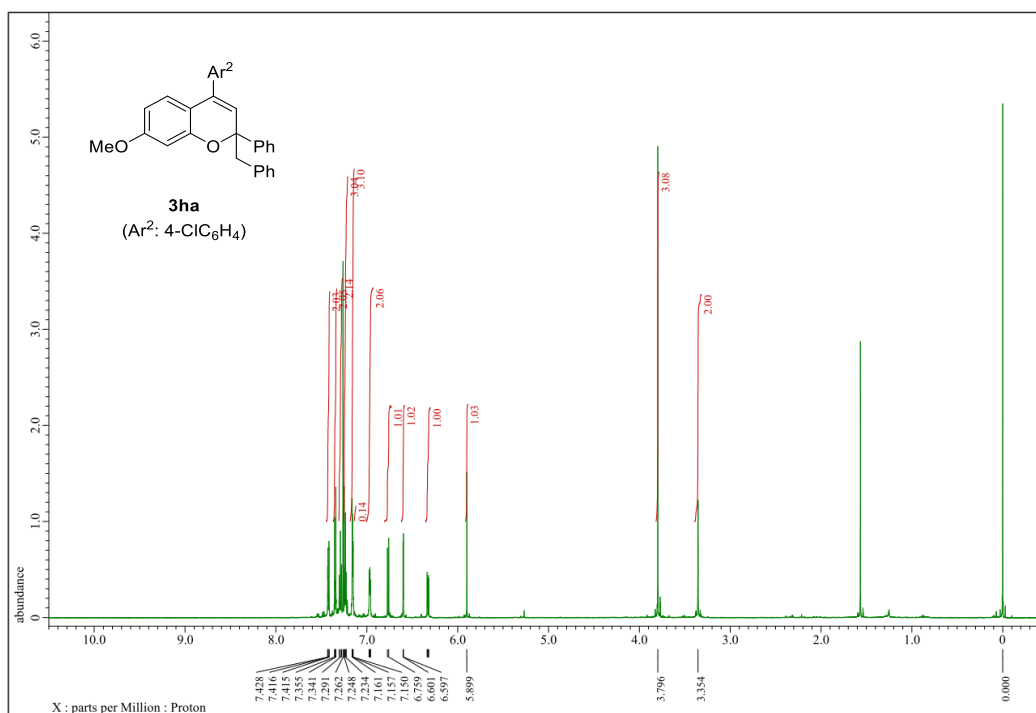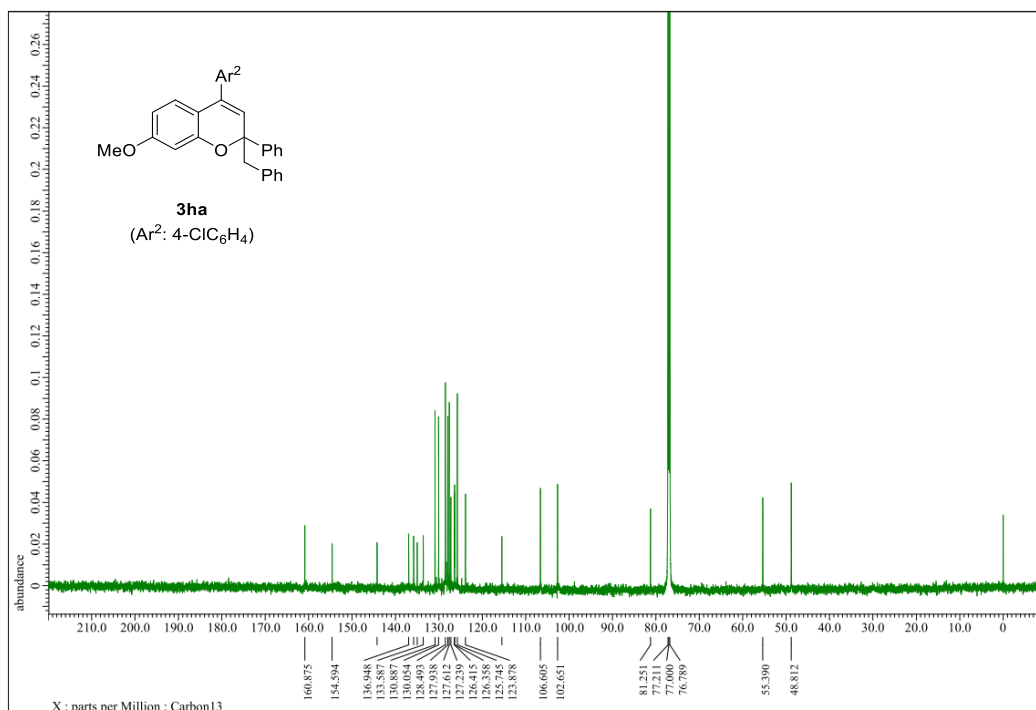

$^1\text{H}$  NMR (600 MHz,  $\text{CDCl}_3$ ) and  $^{13}\text{C}$  NMR (151 MHz,  $\text{CDCl}_3$ ) spectra of **3ia**

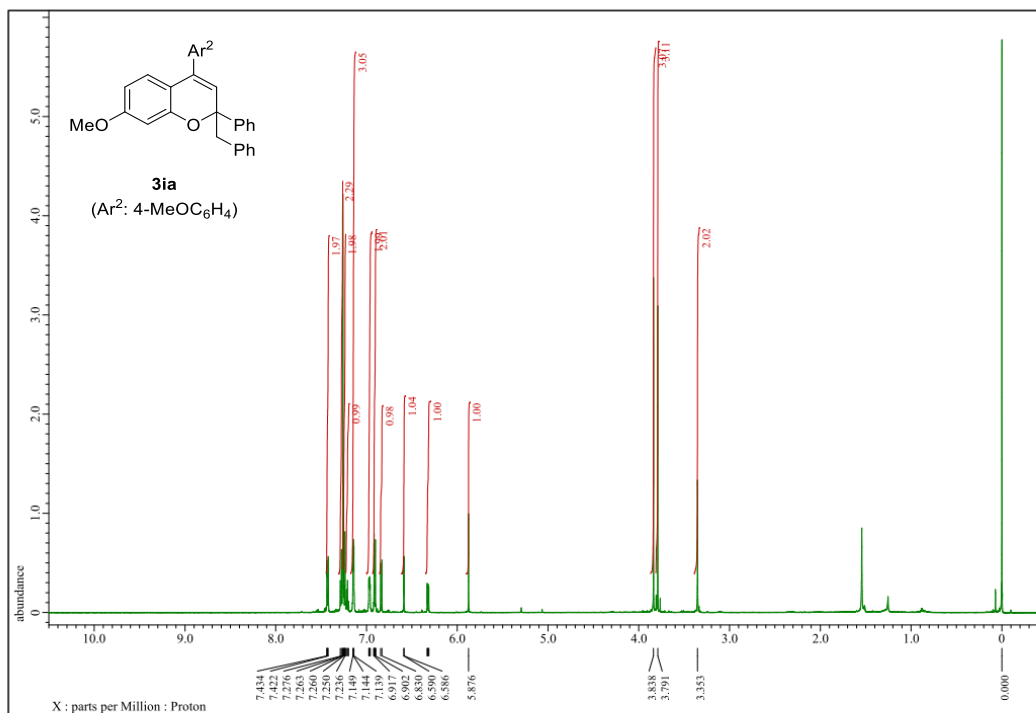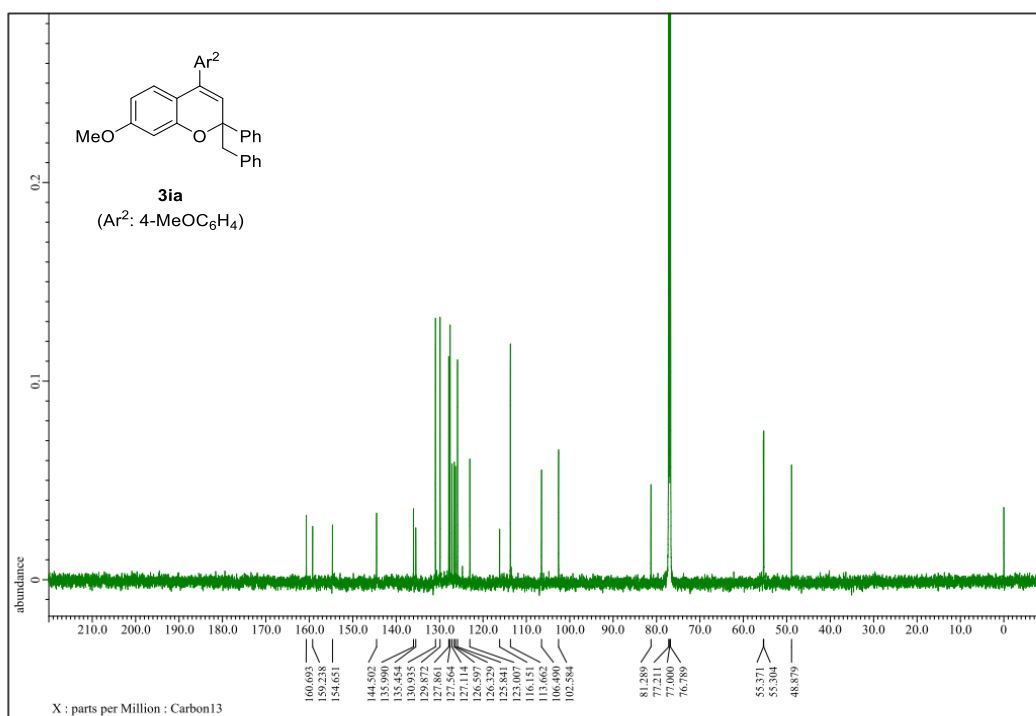

$^1\text{H}$  NMR (600 MHz,  $\text{CDCl}_3$ ) and  $^{13}\text{C}$  NMR (151 MHz,  $\text{CDCl}_3$ ) spectra of **3ja**

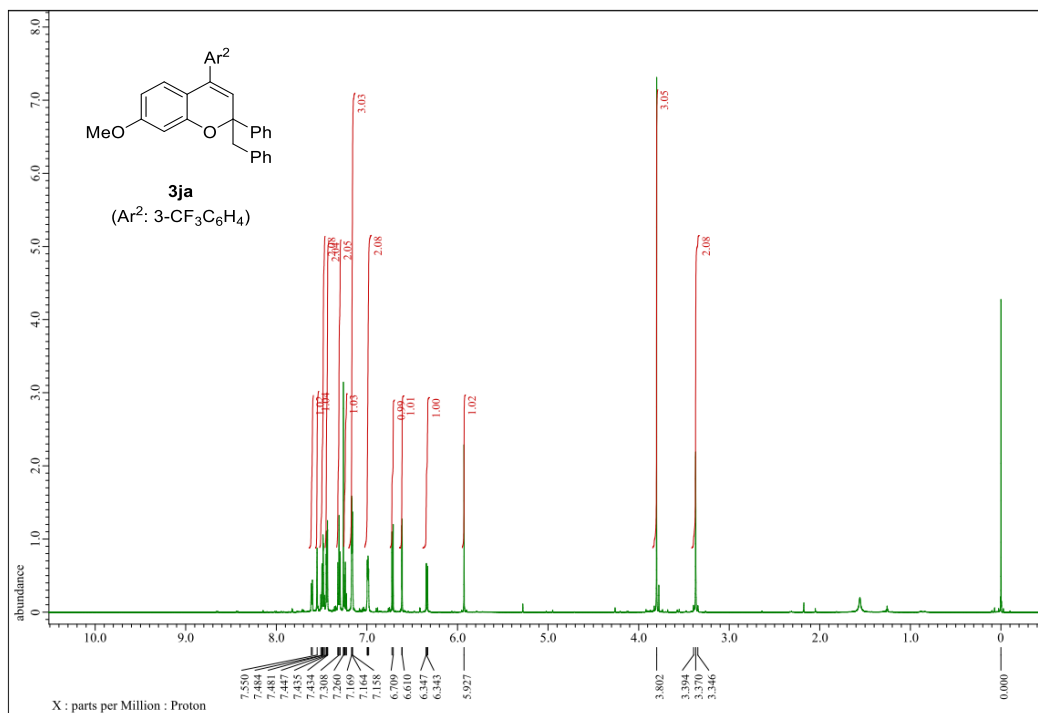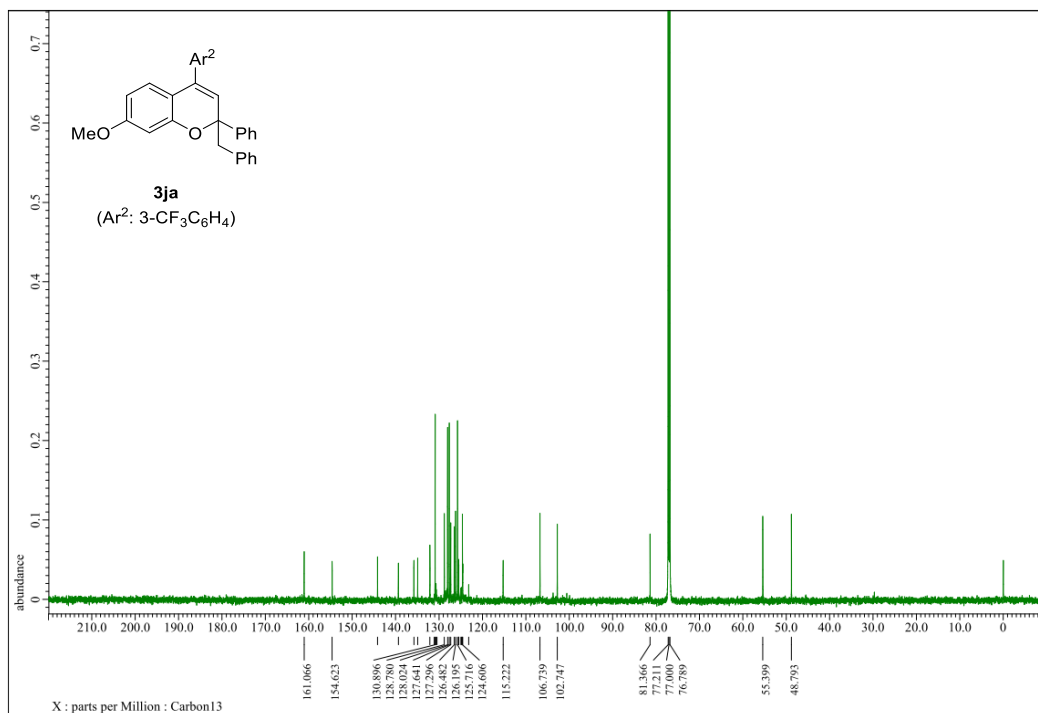

$^{19}\text{F}$  NMR (565 MHz,  $\text{CDCl}_3$ ) spectra of **3ja**

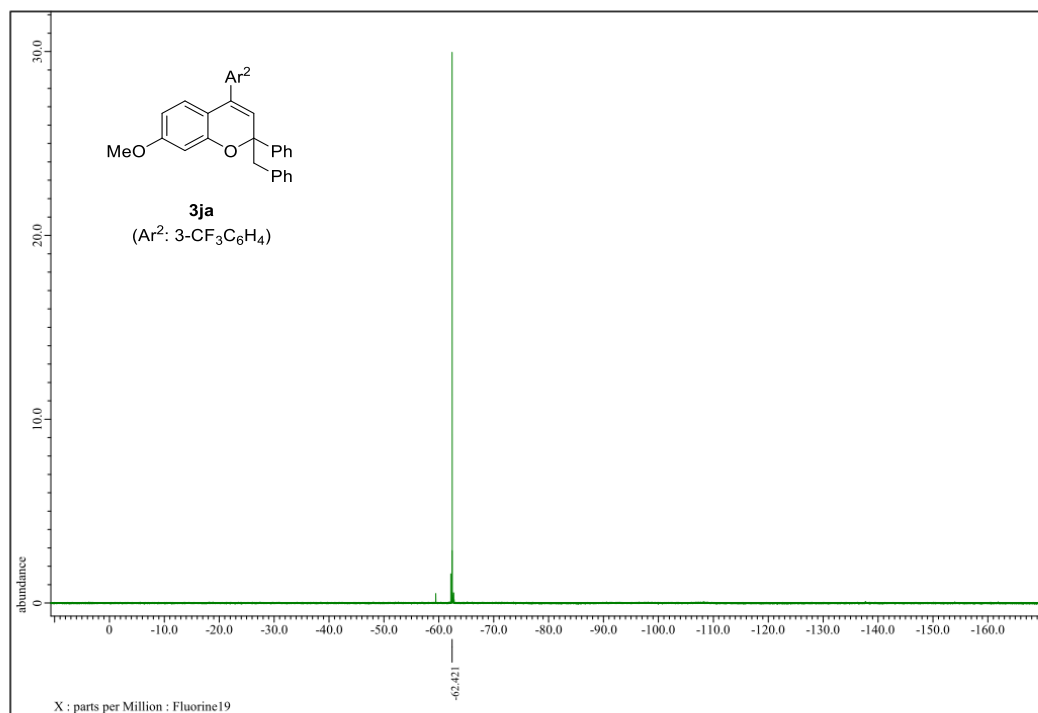

$^1\text{H}$  NMR (600 MHz,  $\text{CDCl}_3$ ) and  $^{13}\text{C}$  NMR (151 MHz,  $\text{CDCl}_3$ ) spectra of **3ka**

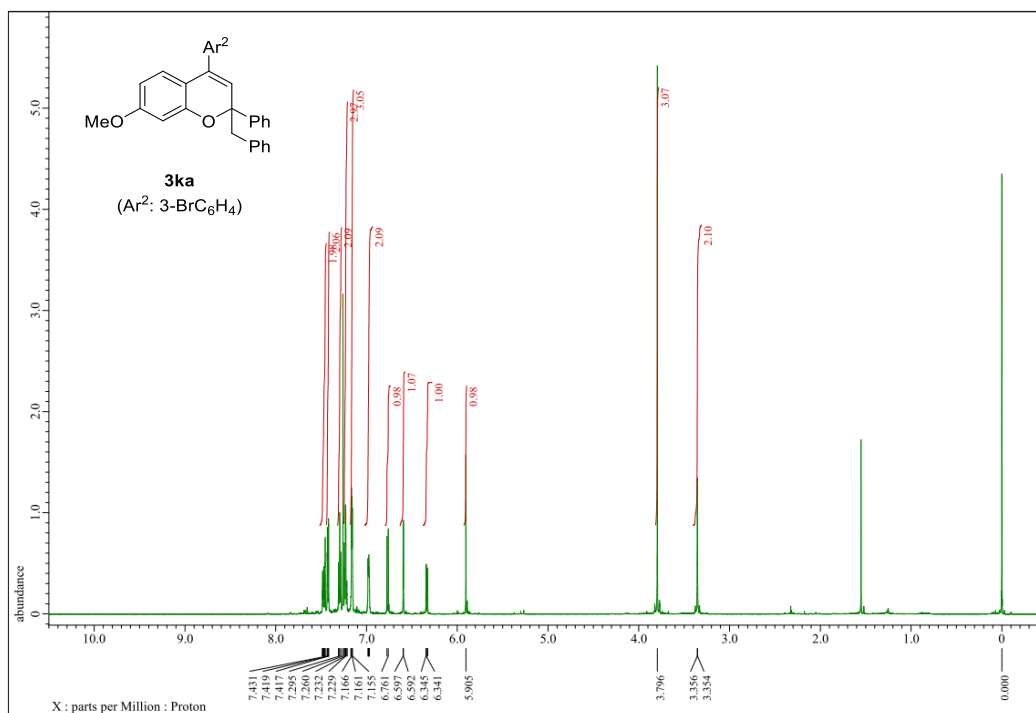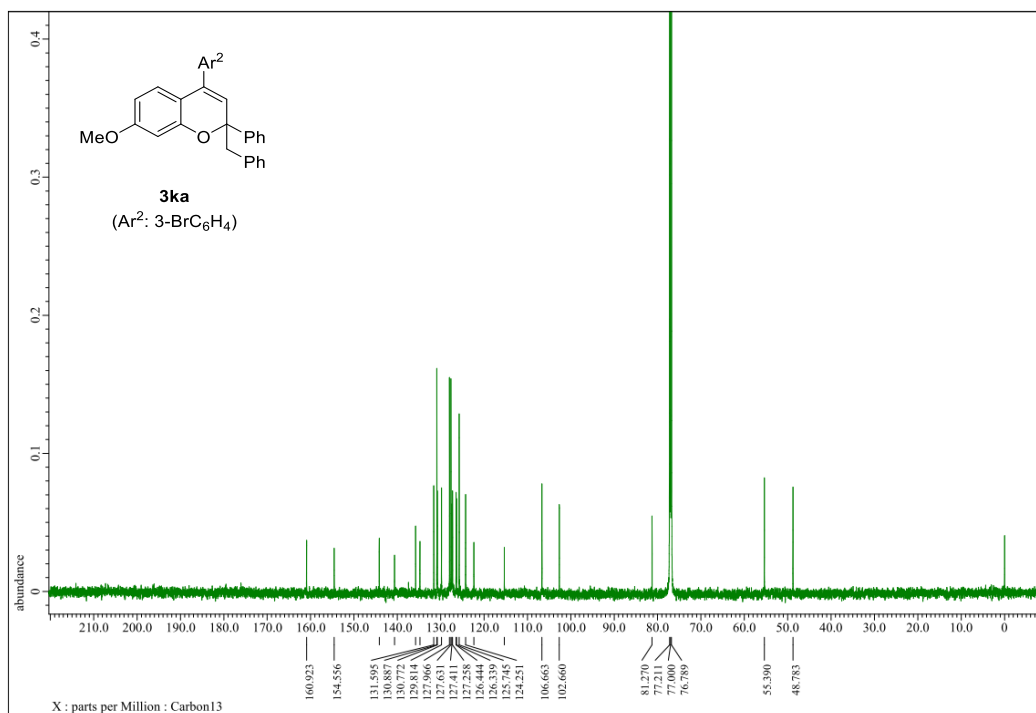

$^1\text{H}$  NMR (600 MHz,  $\text{CDCl}_3$ ) and  $^{13}\text{C}$  NMR (151 MHz,  $\text{CDCl}_3$ ) spectra of **3la**

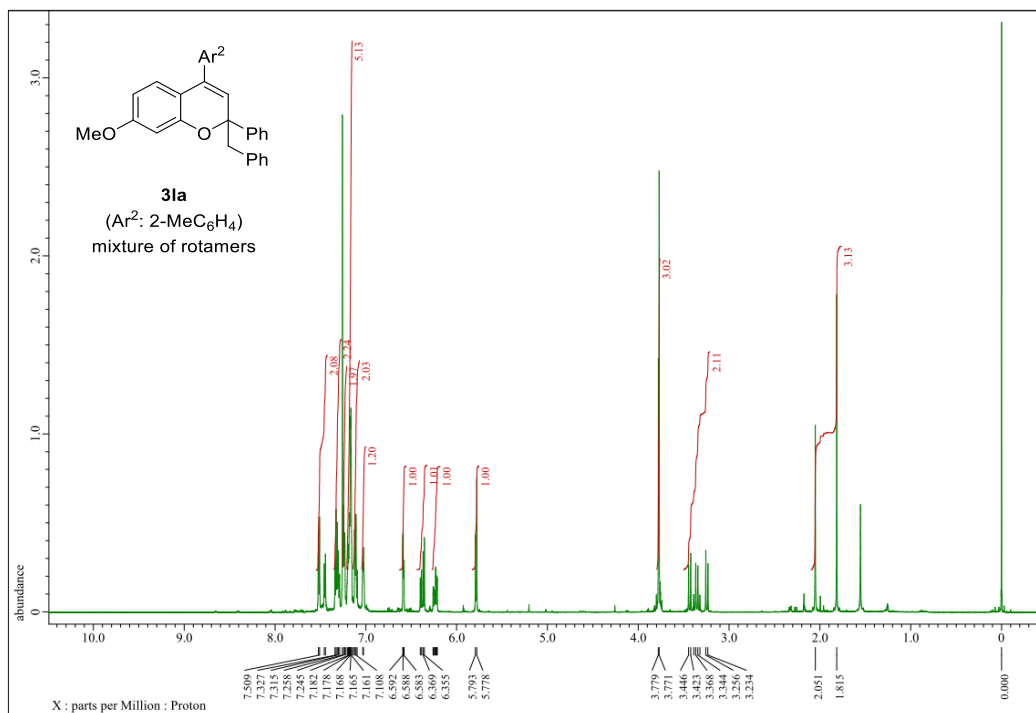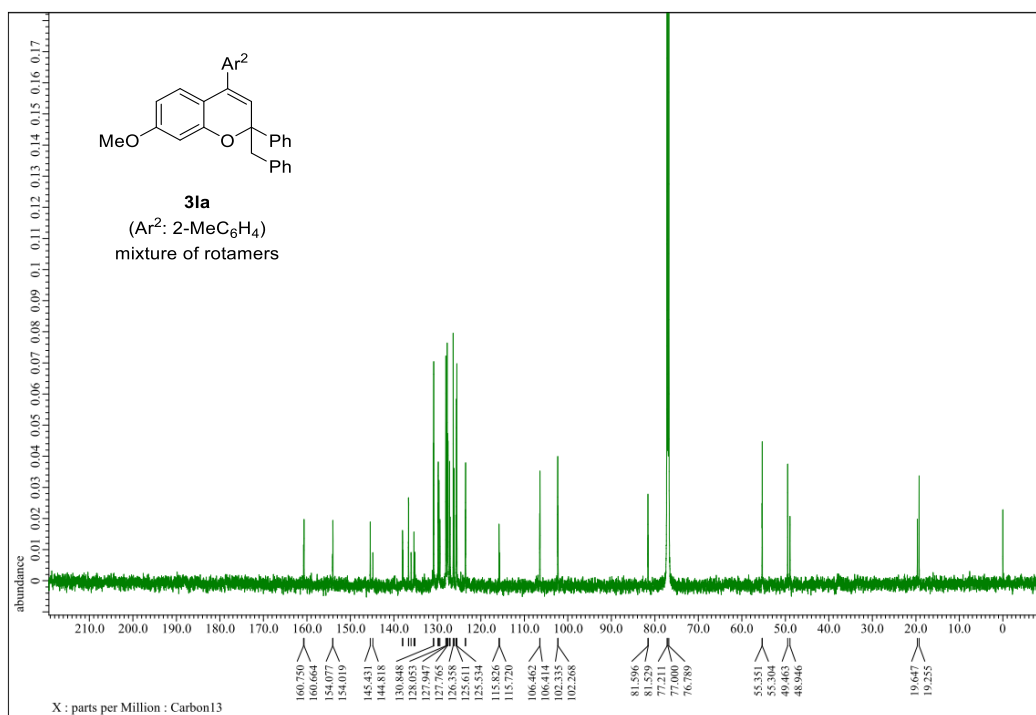

<sup>1</sup>H NMR (600 MHz, CDCl<sub>3</sub>) and <sup>13</sup>C NMR (151 MHz, CDCl<sub>3</sub>) spectra of **3ma** and **3'ma**

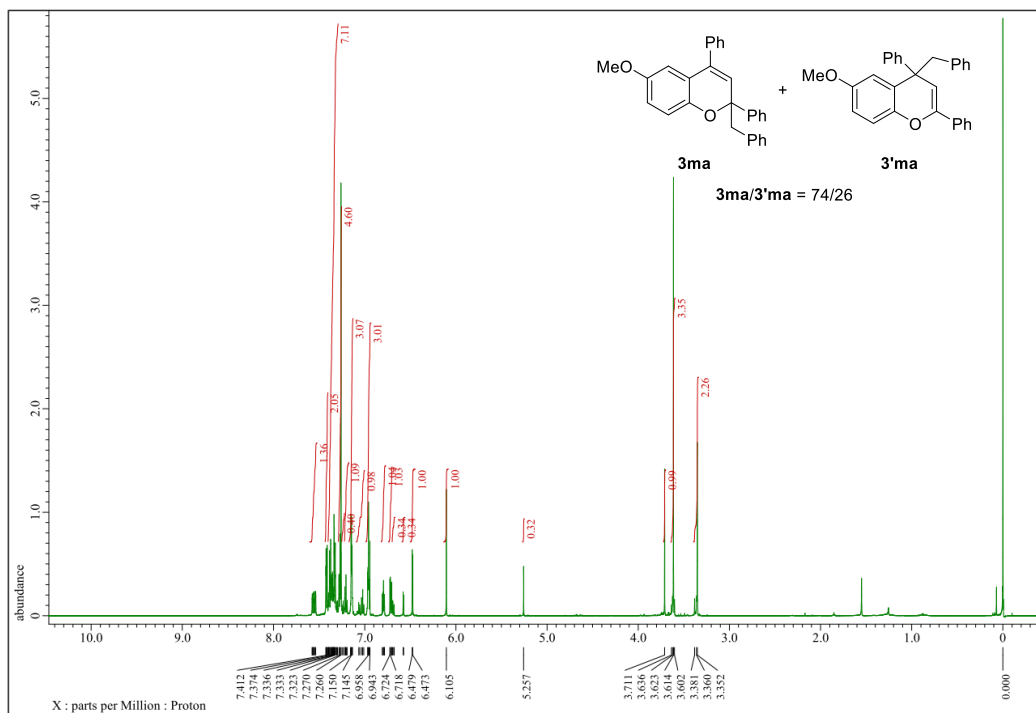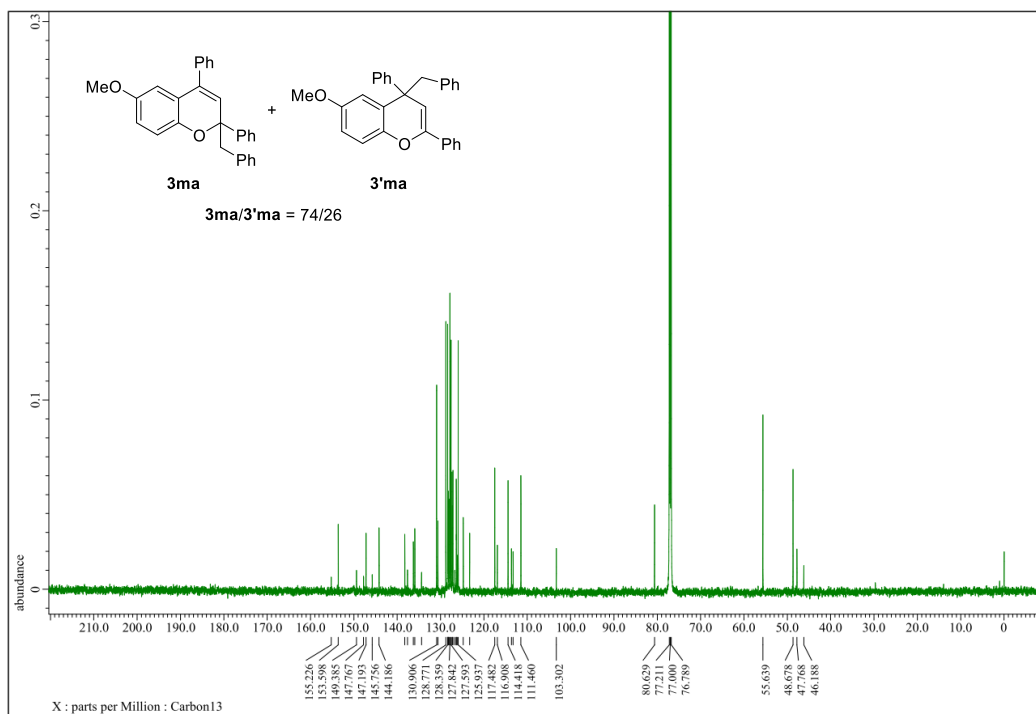

<sup>1</sup>H NMR (600 MHz, CDCl<sub>3</sub>) and <sup>13</sup>C NMR (151 MHz, CDCl<sub>3</sub>) spectra of **3oa** and **3'oa**

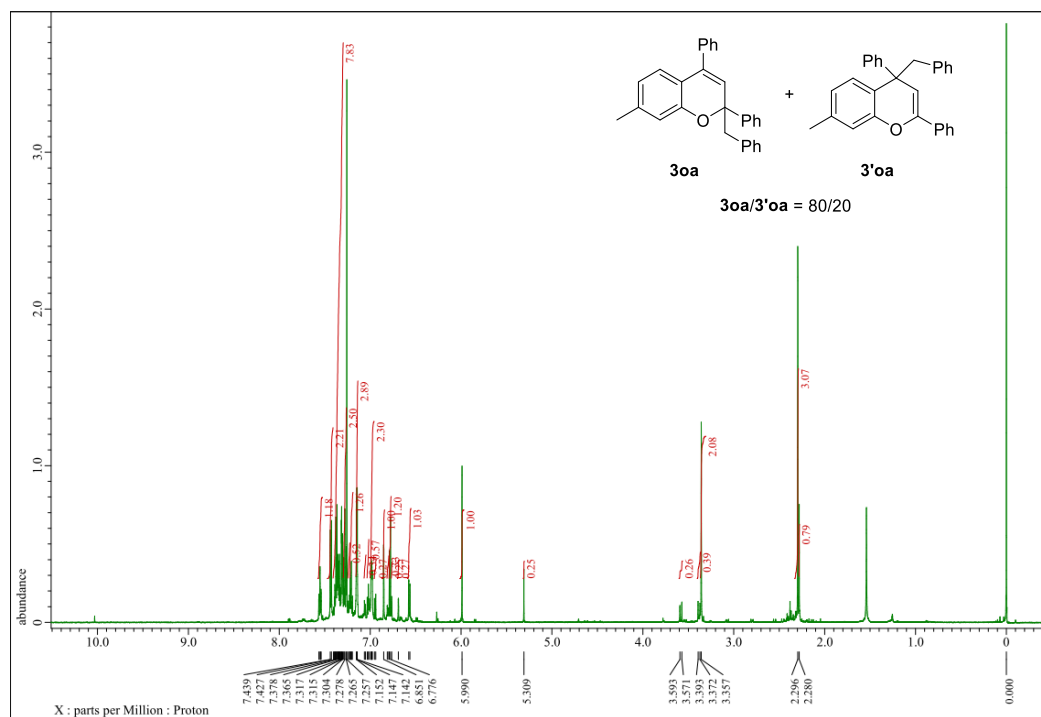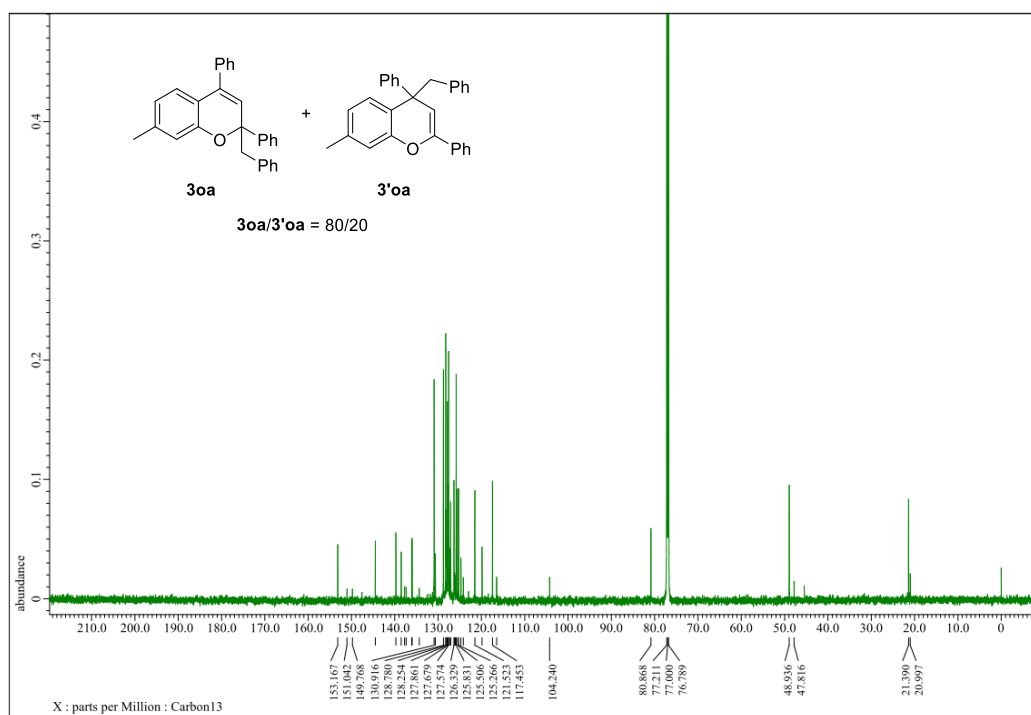



<sup>1</sup>H NMR (600 MHz, CDCl<sub>3</sub>) and <sup>13</sup>C NMR (151 MHz, CDCl<sub>3</sub>) spectra of **3pa** and **3'pa**

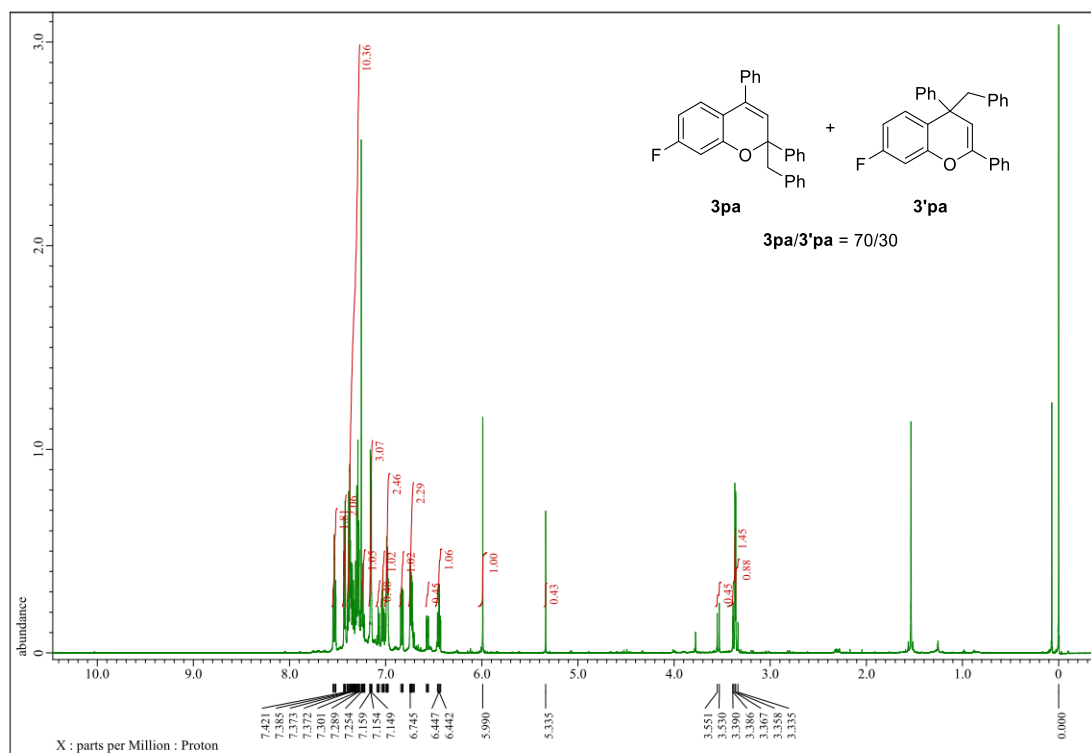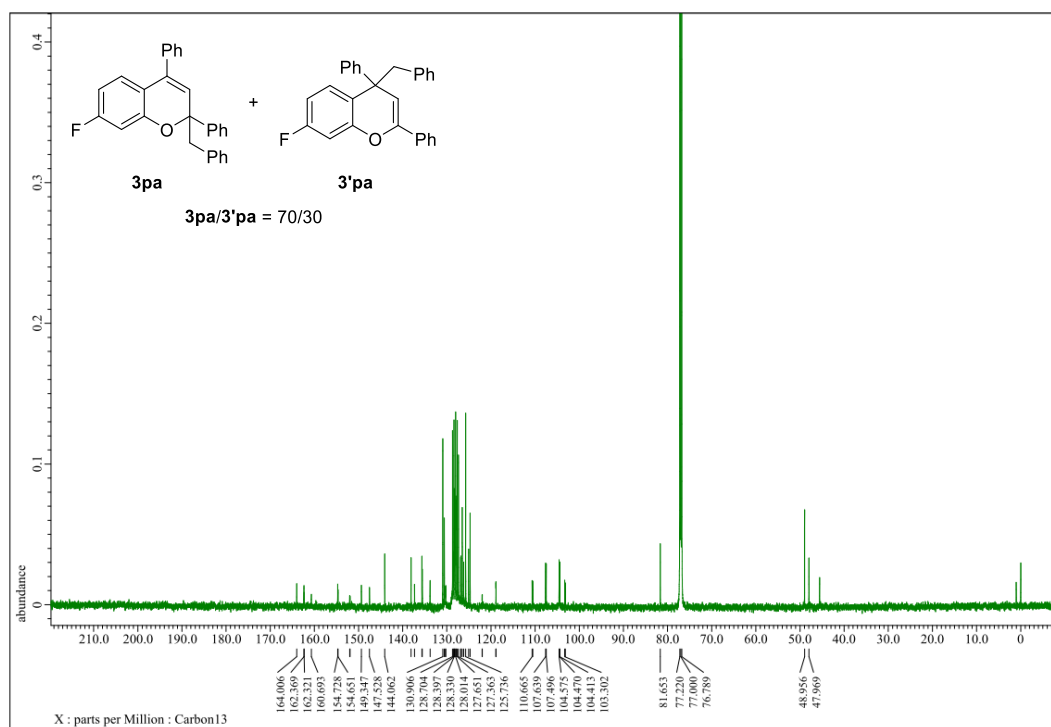

$^{19}\text{F}$  NMR (565 MHz,  $\text{CDCl}_3$ ) spectra of **3pa** and **3'pa**

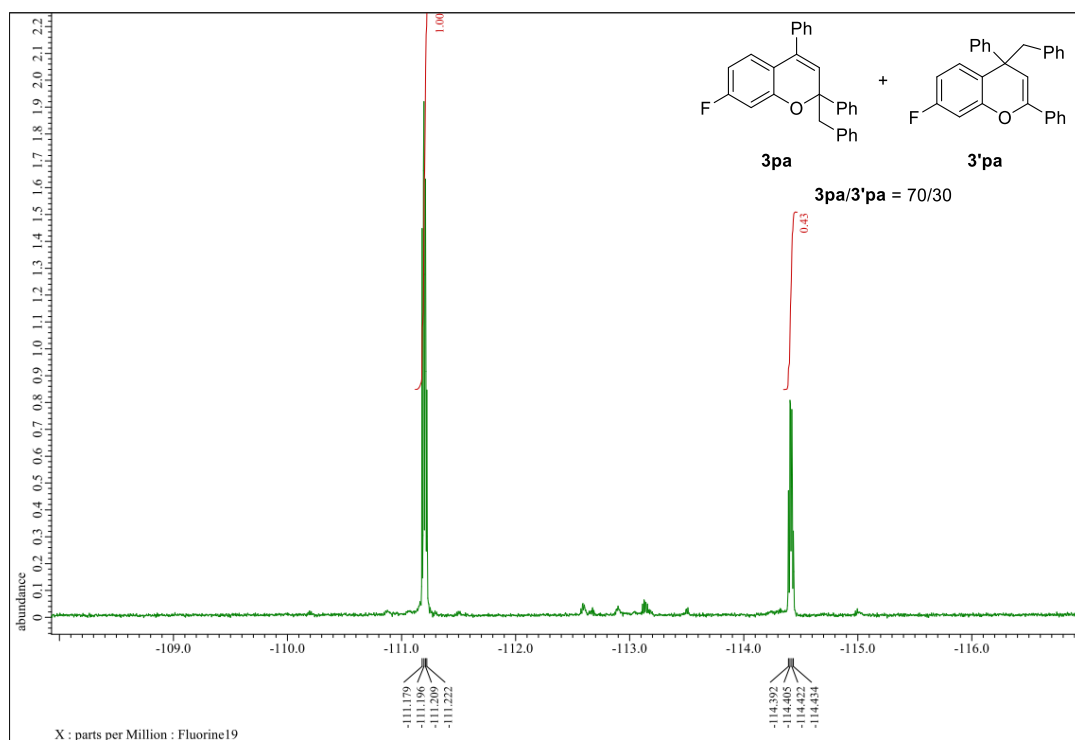

$^1\text{H}$  NMR (600 MHz,  $\text{CDCl}_3$ ) and  $^{13}\text{C}$  NMR (151 MHz,  $\text{CDCl}_3$ ) spectra of **3ab**

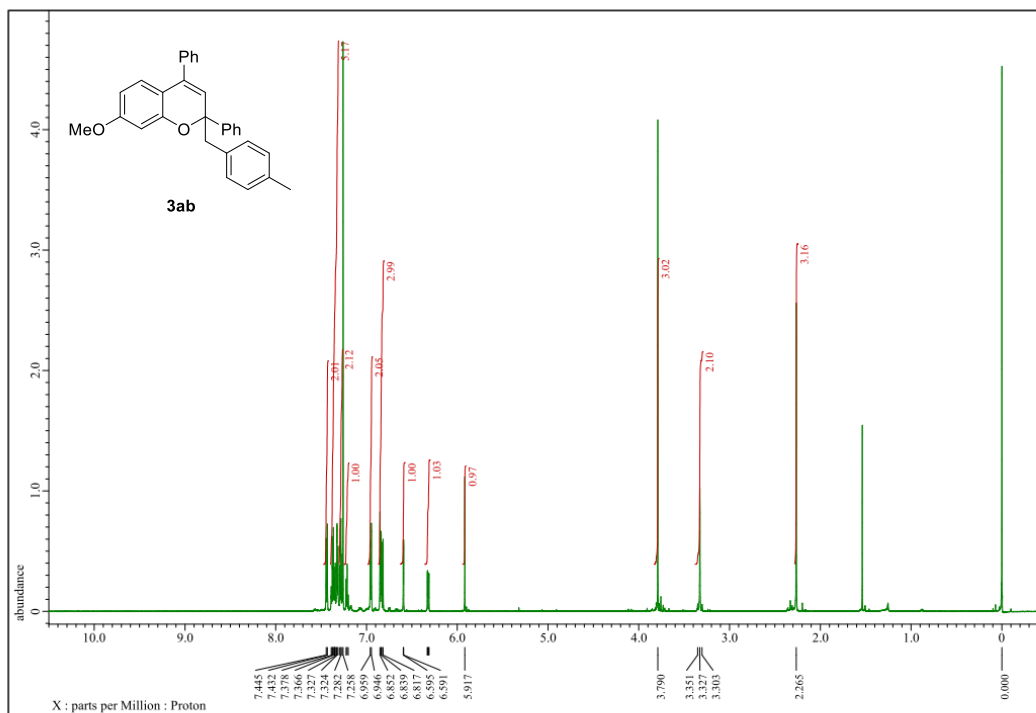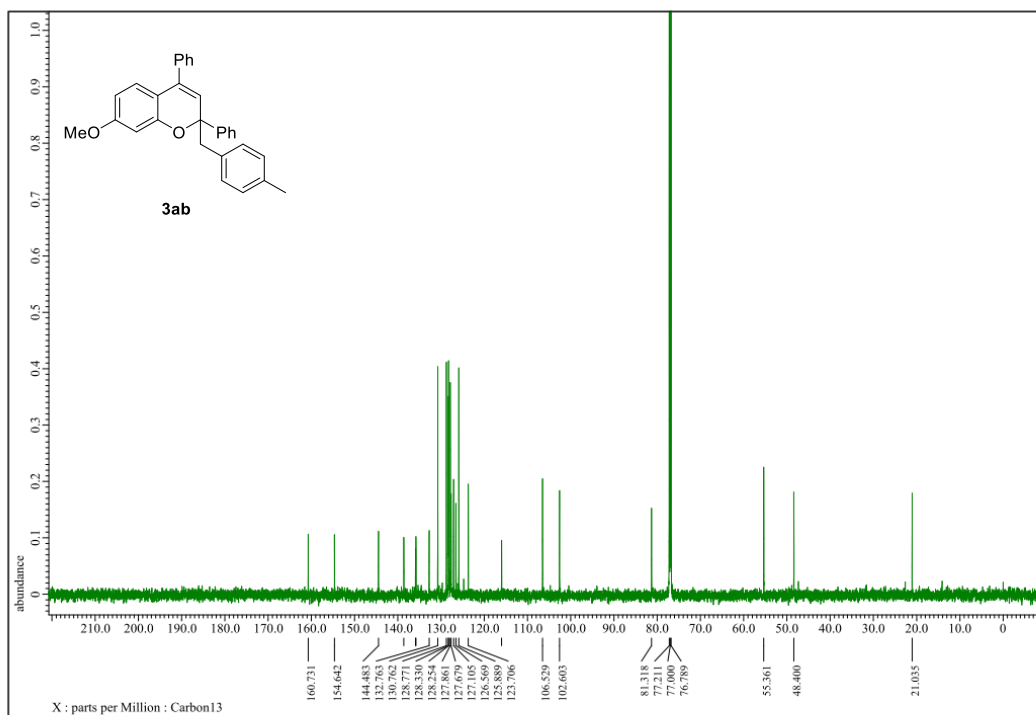

$^1\text{H}$  NMR (600 MHz,  $\text{CDCl}_3$ ) and  $^{13}\text{C}$  NMR (151 MHz,  $\text{CDCl}_3$ ) spectra of **3ac**

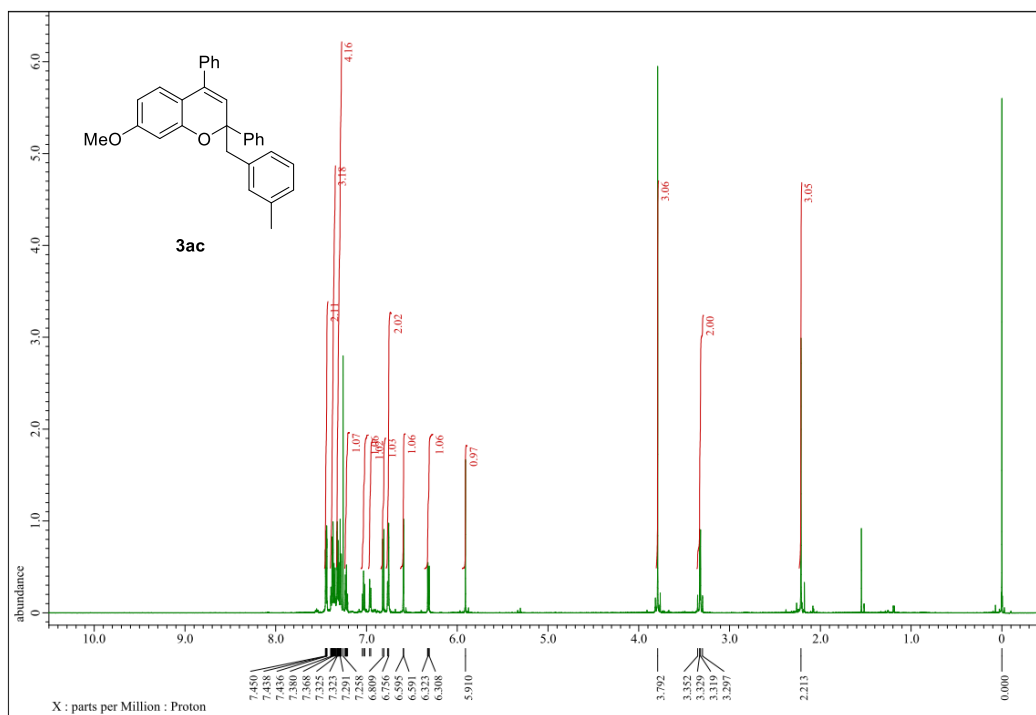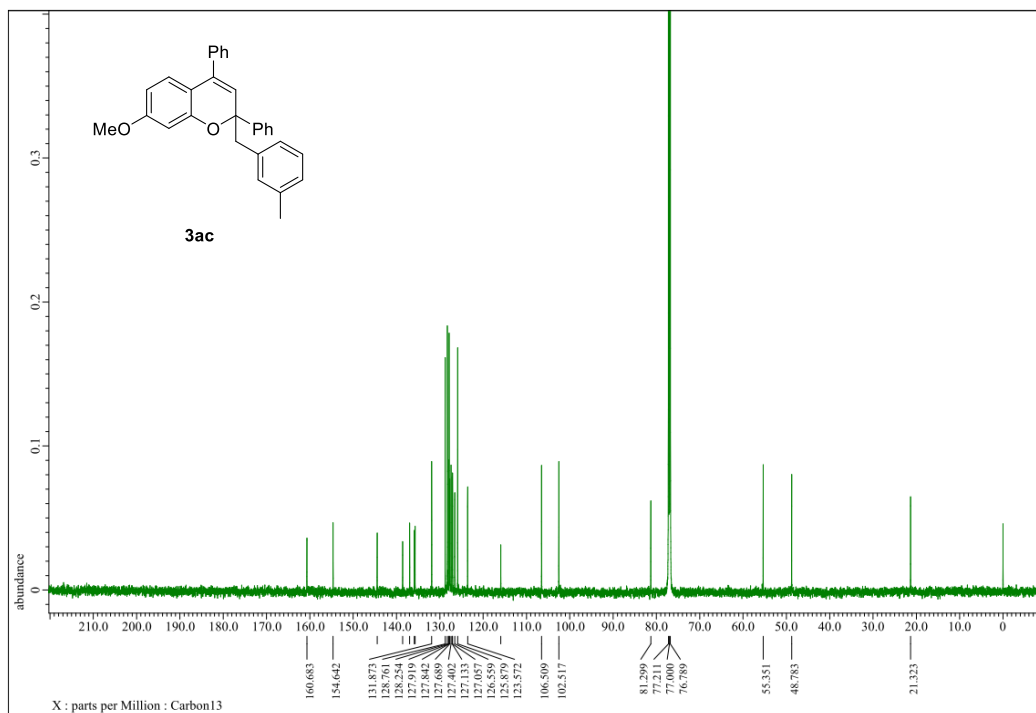

<sup>1</sup>H NMR (600 MHz, CDCl<sub>3</sub>) and <sup>13</sup>C NMR (151 MHz, CDCl<sub>3</sub>) spectra of **3ad**

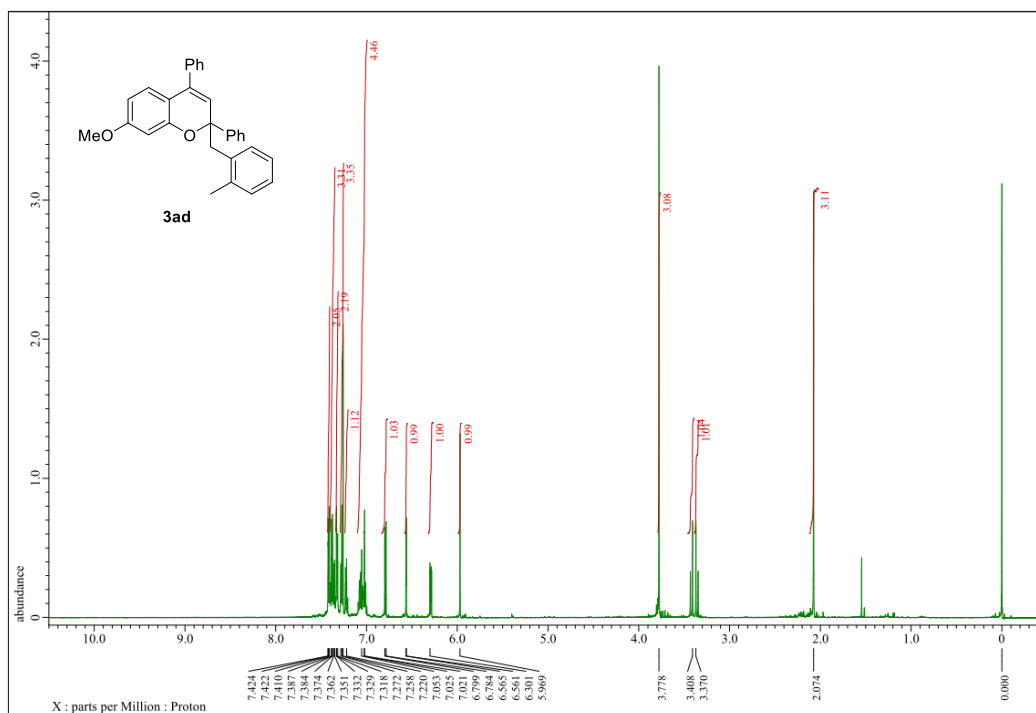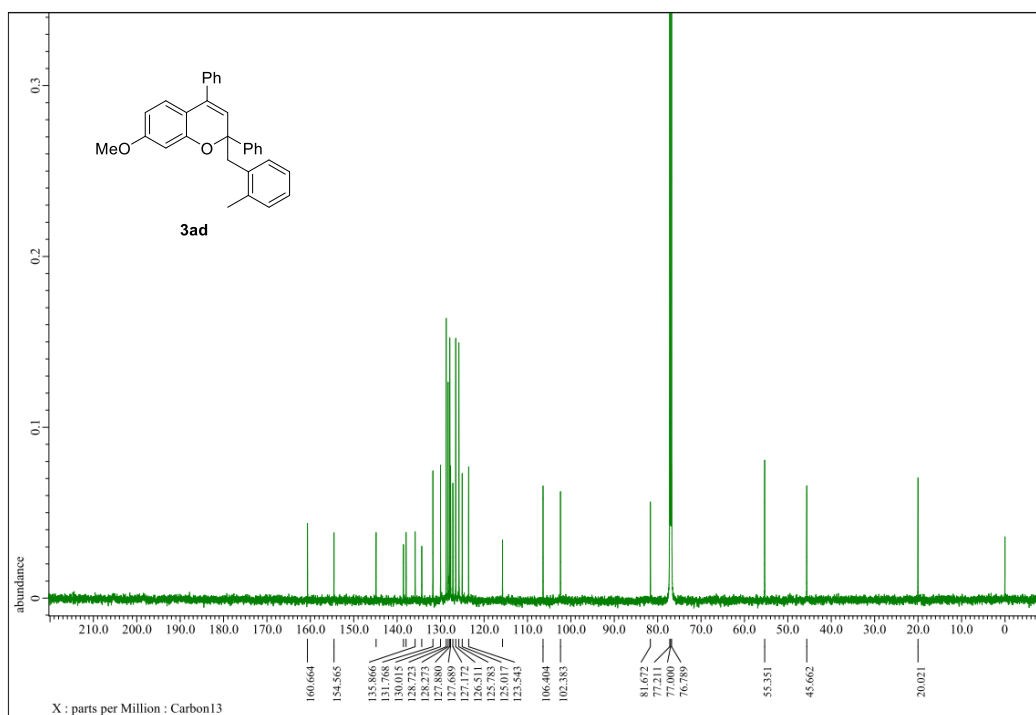

$^1\text{H}$  NMR (600 MHz,  $\text{CDCl}_3$ ) and  $^{13}\text{C}$  NMR (151 MHz,  $\text{CDCl}_3$ ) spectra of **3ae**

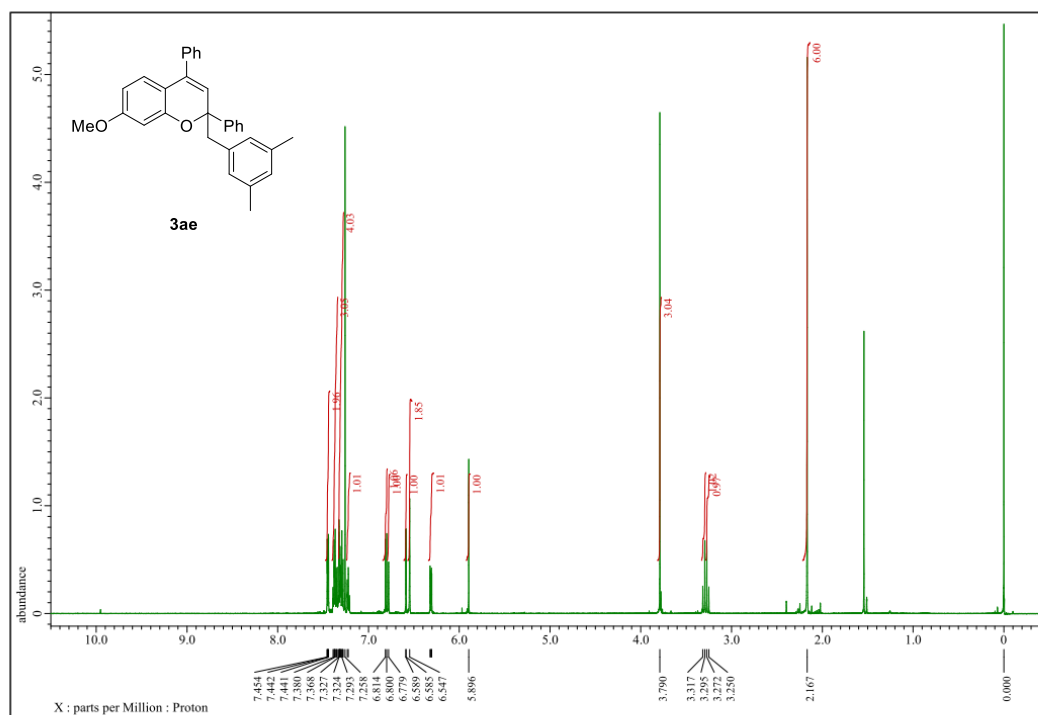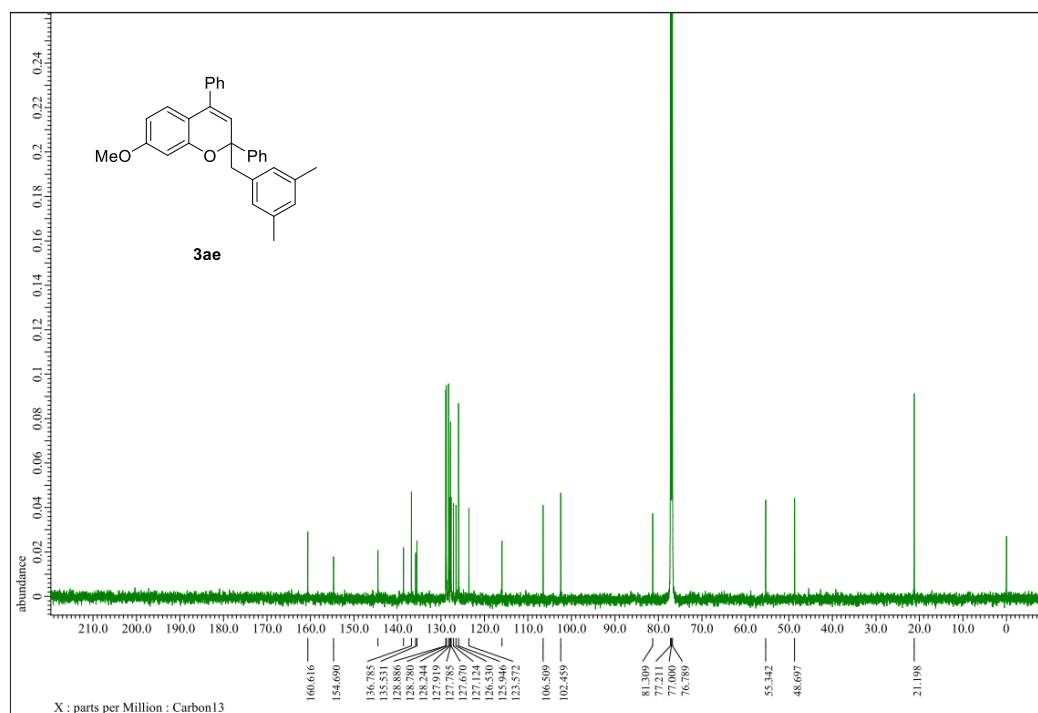



<sup>1</sup>H NMR (600 MHz, CDCl<sub>3</sub>) and <sup>13</sup>C NMR (151 MHz, CDCl<sub>3</sub>) spectra of **3ag**

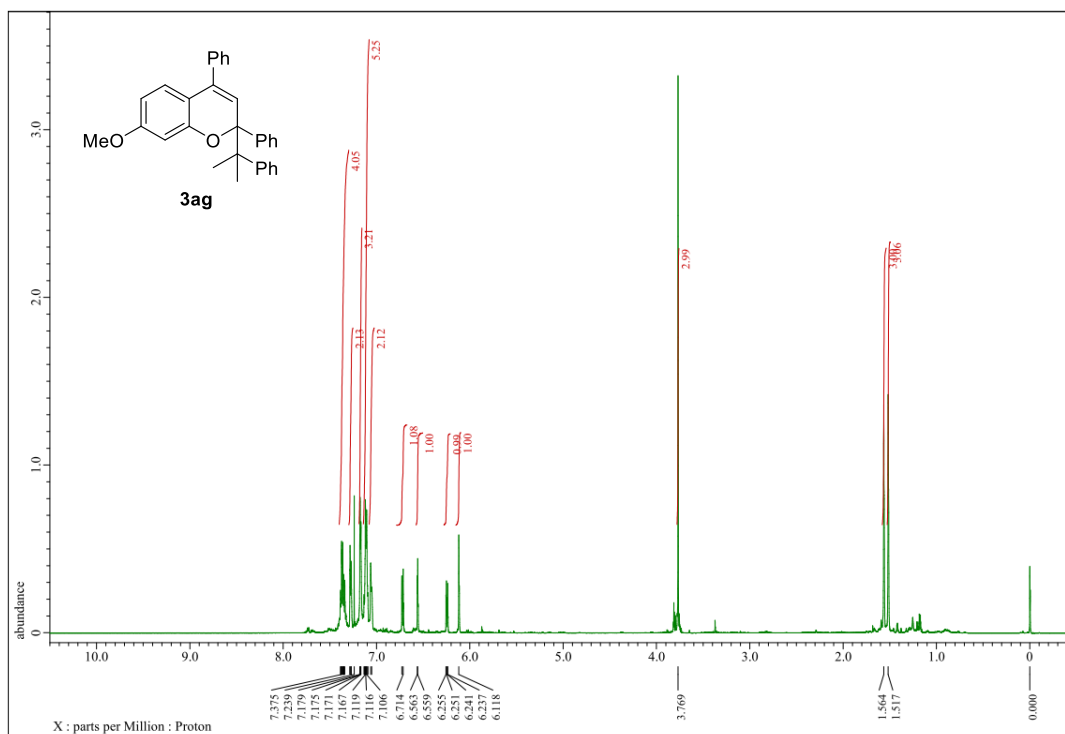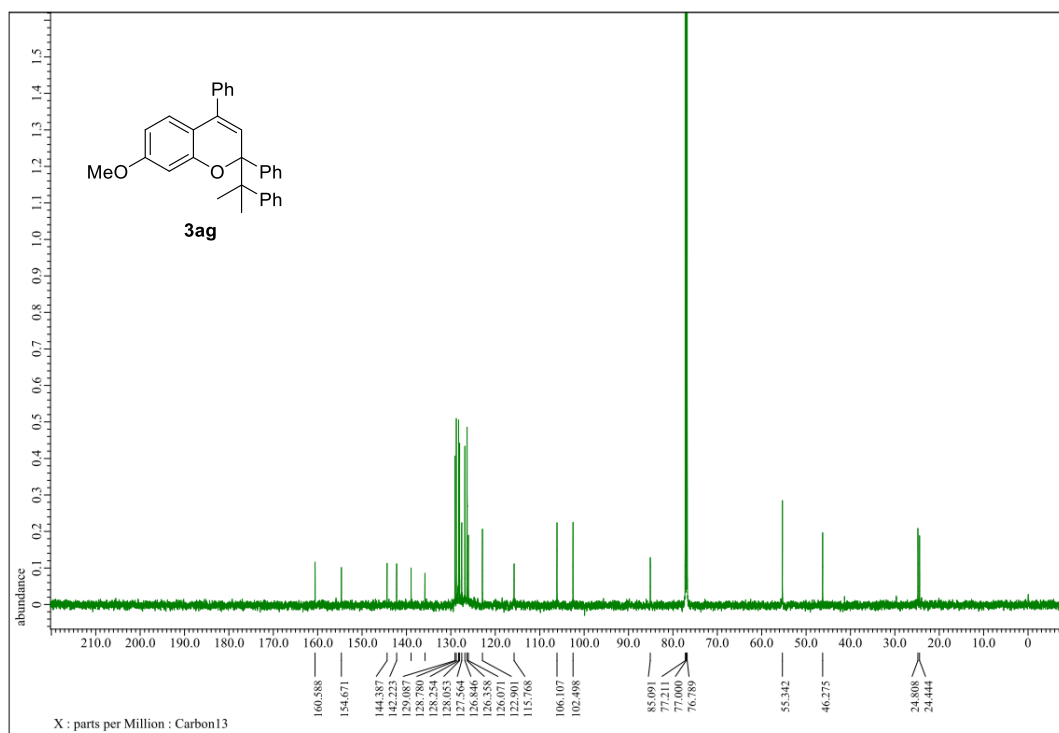



$^1\text{H}$  NMR (600 MHz,  $\text{CDCl}_3$ ) and  $^{13}\text{C}$  NMR (151 MHz,  $\text{CDCl}_3$ ) spectra of **3ah**

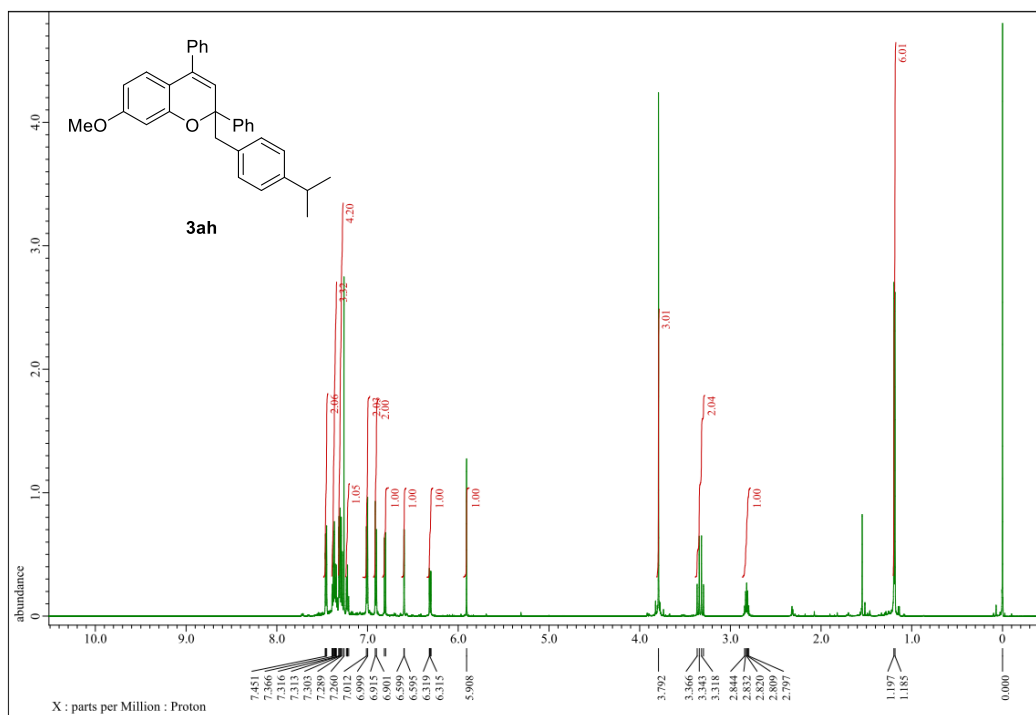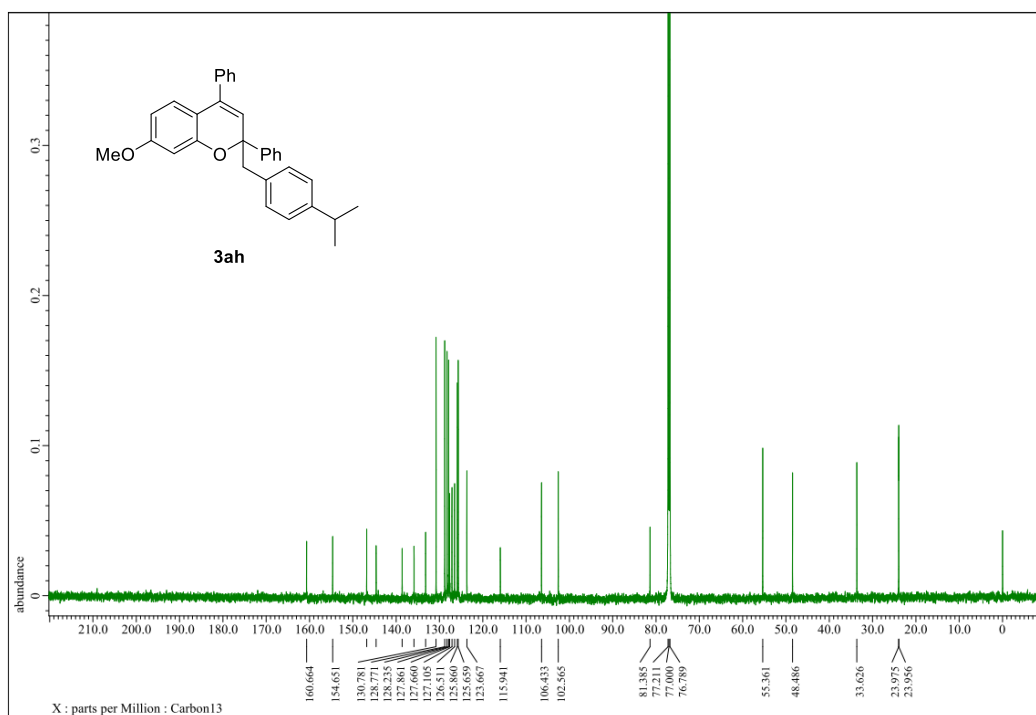

$^1\text{H}$  NMR (600 MHz,  $\text{CDCl}_3$ ) and  $^{13}\text{C}$  NMR (151 MHz,  $\text{CDCl}_3$ ) spectra of **3ai**

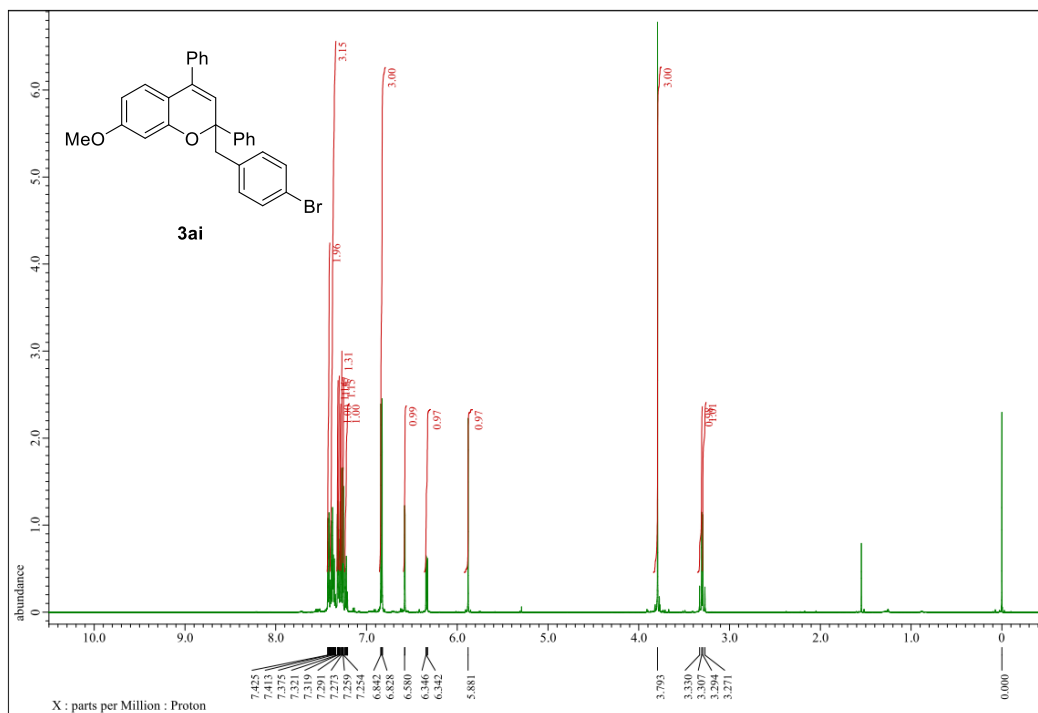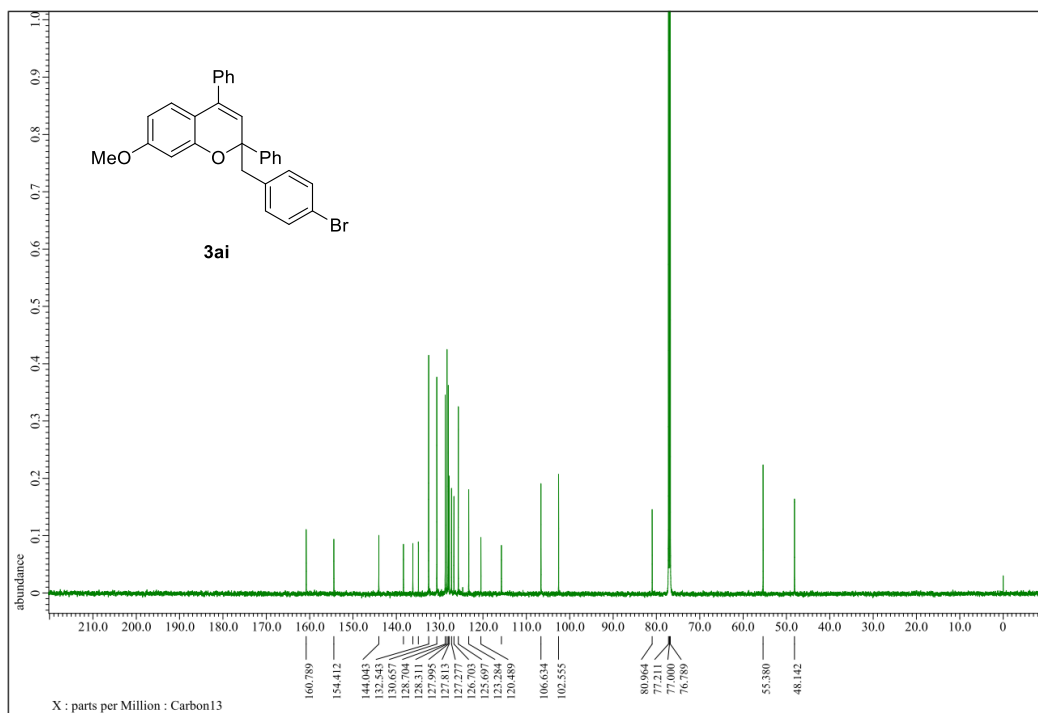

$^1\text{H}$  NMR (600 MHz,  $\text{CDCl}_3$ ) and  $^{13}\text{C}$  NMR (151 MHz,  $\text{CDCl}_3$ ) spectra of **3aj**

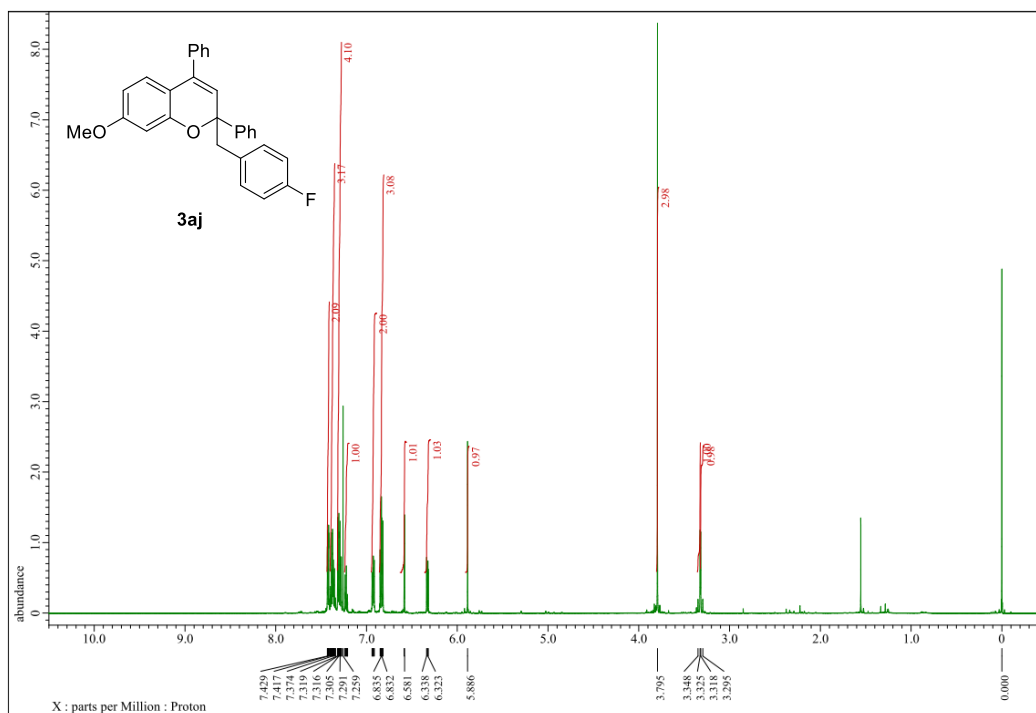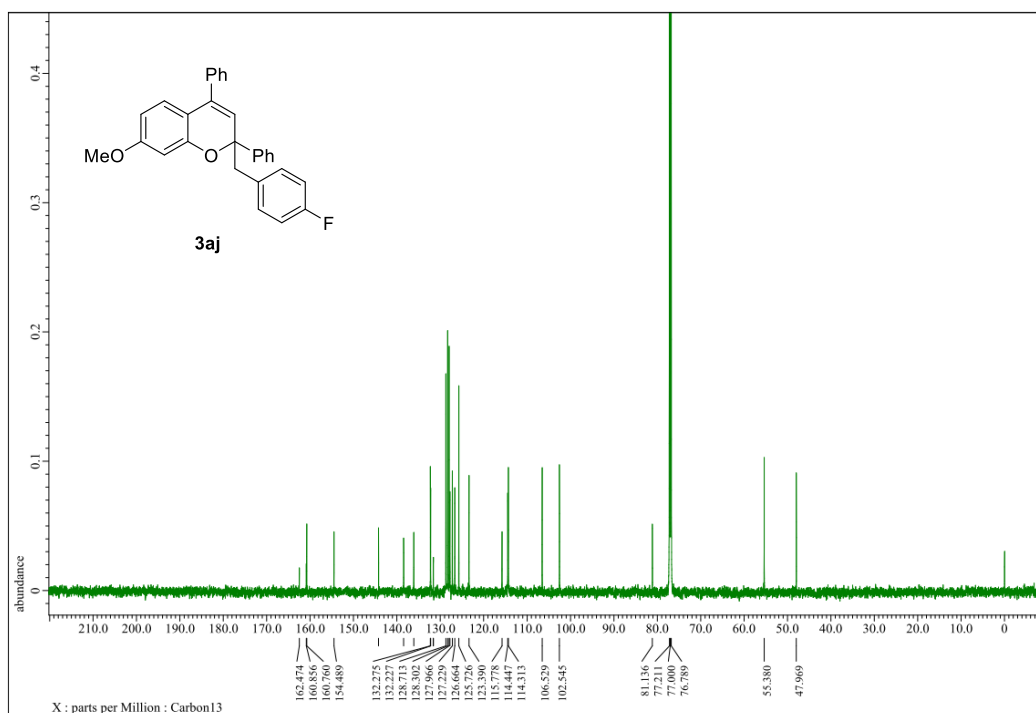

$^{19}\text{F}$  NMR (565 MHz,  $\text{CDCl}_3$ ) spectra of **3aj**

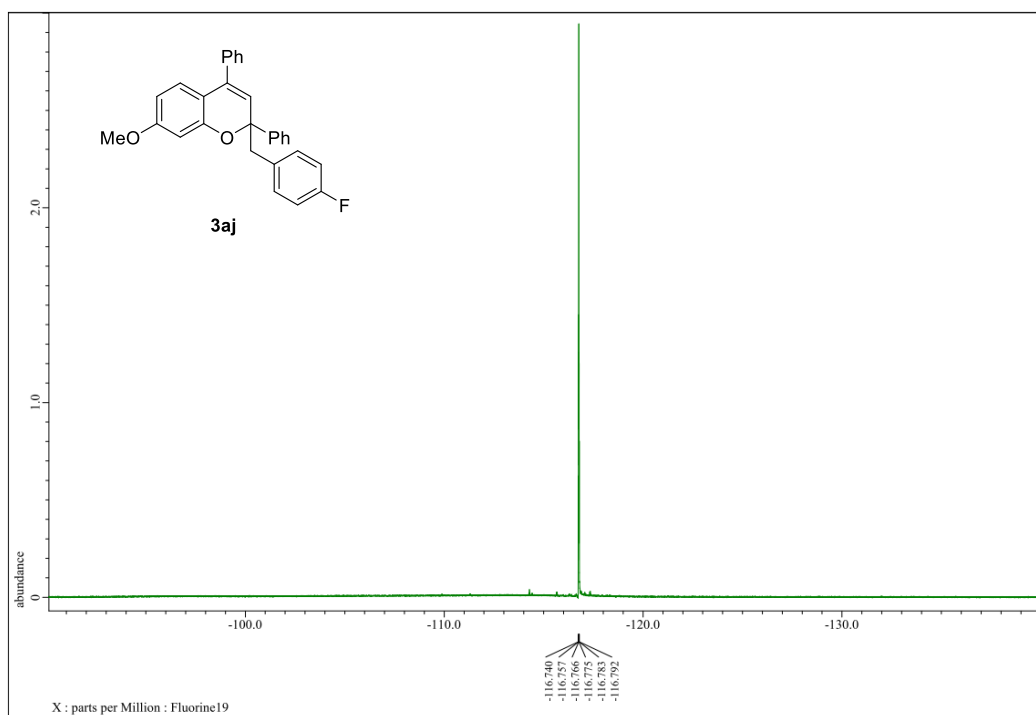

### 13. HPLC chart

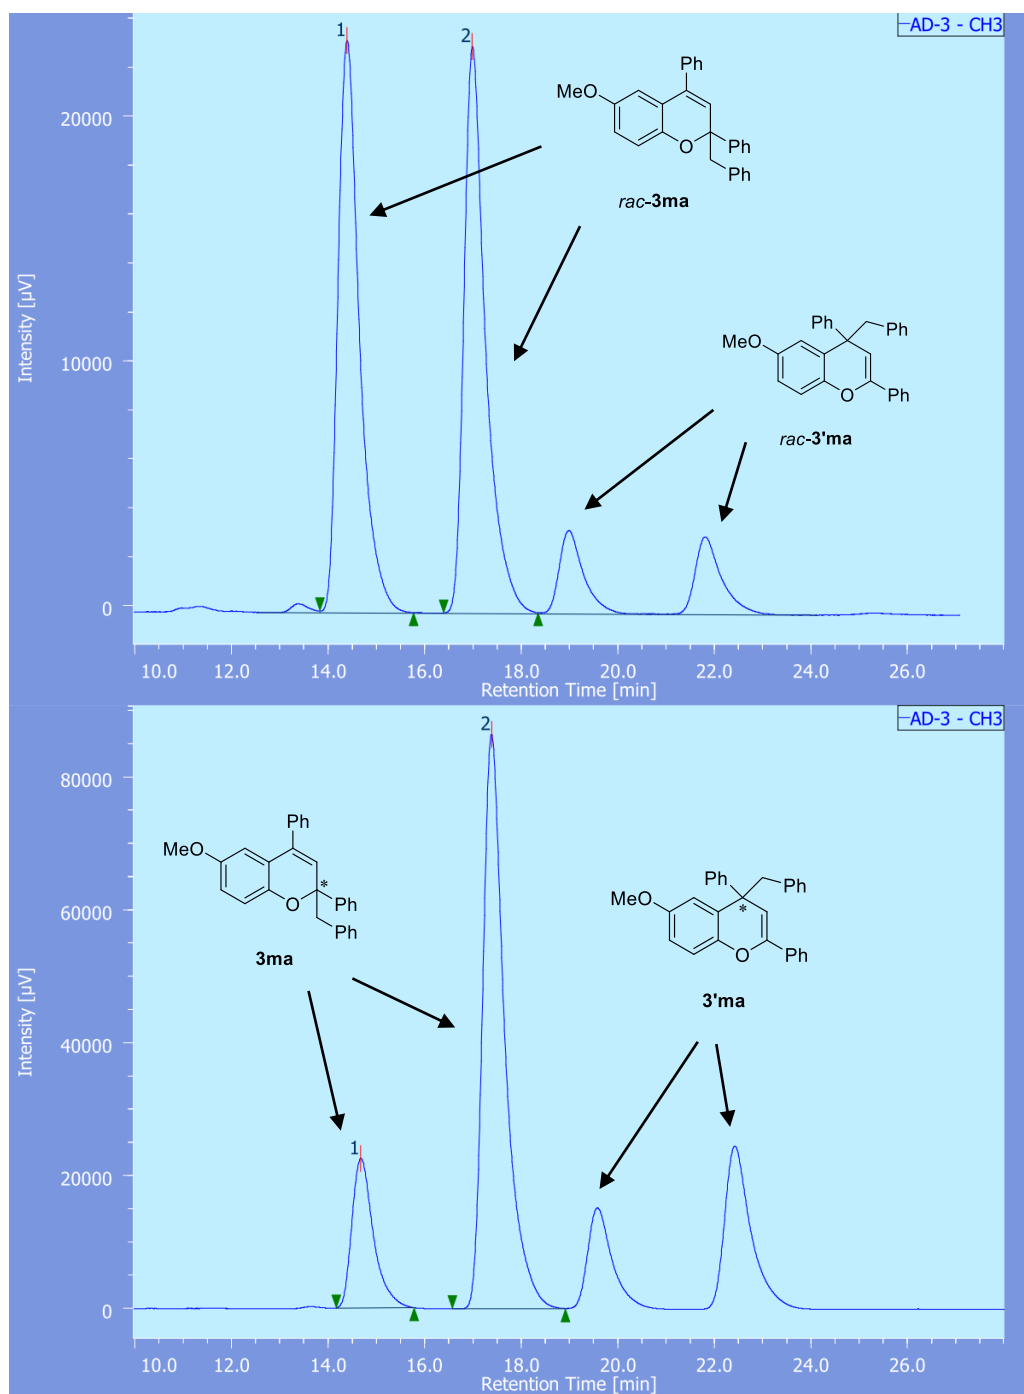

|                 | Retention Time (1) | Retention Time (2) | %Area (1) | %Area (2) |
|-----------------|--------------------|--------------------|-----------|-----------|
| <i>rac-3ma</i>  | 14.4               | 17.0               | 50.0      | 50.0      |
| <i>3ma</i>      | 14.7               | 17.4               | 20.2      | 79.8      |
| <i>rac-3'ma</i> | 19.0               | 21.8               | 49.8      | 50.2      |
| <i>3'ma</i>     | 18.8               | 21.5               | 37.3      | 62.7      |
